# Supplementary material for: A moisture-tolerant route to unprotected α/β-amino acid N-carboxyanhydrides and facile synthesis of hyperbranched polypeptides
Source: PubMed Central journal article supplement (PMC8490447; doi:10.1038/s41467-021-25689-y), 2021-10-04
Supplement: 41467_2021_25689_MOESM1_ESM.pdf [file 41467_2021_25689_MOESM1_ESM.pdf]

# Supplementary Information

## A Moisture-Tolerant Route to Unprotected $\alpha/\beta$ -Amino Acid *N*-Carboxyanhydrides and Facile Synthesis of Hyperbranched Polypeptides

Zi-You Tian,<sup>1</sup> Zhengchu Zhang,<sup>1</sup> Shuo Wang,<sup>1</sup> and Hua Lu<sup>1,\*</sup>

<sup>1</sup>Beijing National Laboratory for Molecular Sciences, Center for Soft Matter Science and Engineering, Key Laboratory of Polymer Chemistry and Physics of Ministry of Education, College of Chemistry and Molecular Engineering, Peking University, Beijing 100871, People's Republic of China.

Email: [chemhualu@pku.edu.cn](mailto:chemhualu@pku.edu.cn)

## Contents

|                                        |    |
|----------------------------------------|----|
| Supplementary Methods .....            | 1  |
| Supplementary Figures and Tables ..... | 20 |
| Supplementary References.....          | 89 |

## Supplementary Methods

### Materials

All of the reagents were purchased from commercial sources and used as received. **Without specific illustration, all of the solvents were analytically pure. The silica gel was dried under 96 °C for 3 – 4 h in an oven before use.**

| Reagent                                    | Manufactory                                    |
|--------------------------------------------|------------------------------------------------|
| THF (AR)                                   | <i>Concord Technology</i> (Tianjin, China)     |
| DMF (AR)                                   | <i>Concord Technology</i> (Tianjin, China)     |
| acetonitrile (AR)                          | <i>Concord Technology</i> (Tianjin, China)     |
| triphosgene                                | <i>J&amp;K</i> (Beijing, China)                |
| propylene oxide                            | <i>HUSHI</i> (Shanghai, China)                 |
| epichlorohydrin                            | <i>HUSHI</i> (Shanghai, China)                 |
| $\gamma$ -benzyl L-glutamate               | <i>Konoscience</i> (Beijing, China)            |
| L-Cbz-Lysine                               | <i>Konoscience</i> (Beijing, China)            |
| $\epsilon$ -trifluoroacetyl L-lysine       | <i>J&amp;K</i> (Beijing, China)                |
| L-alanine                                  | <i>HUSHI</i> (Shanghai, China)                 |
| L-phenylalanine                            | <i>Heowns</i> (Tianjin, China)                 |
| L-valine                                   | <i>J&amp;K</i> (Beijing, China)                |
| L-leucine                                  | <i>J&amp;K</i> (Beijing, China)                |
| L-tryptophan                               | <i>Konoscience</i> (Beijing, China)            |
| L-tyrosine                                 | <i>GL Biochem</i> (Shanghai, China)            |
| glycine                                    | <i>HUSHI</i> (Shanghai, China)                 |
| L-methionine                               | <i>3A Chem</i> (Shanghai, China)               |
| <i>O</i> -tert-butyl L-serine              | <i>Konoscience</i> (Beijing, China)            |
| $\epsilon$ - <i>N</i> -Boc L-lysine        | <i>Konoscience</i> (Beijing, China)            |
| L-serine                                   | <i>J&amp;K</i> (Beijing, China)                |
| L-threonine                                | <i>J&amp;K</i> (Beijing, China)                |
| L-cysteine                                 | <i>Aladdin</i> (Shanghai, China)               |
| D-penicillamine                            | <i>Yuanye Bio-Technology</i> (Shanghai, China) |
| L-glutamic acid                            | <i>HUSHI</i> (Shanghai, China)                 |
| Boc-sarcosine                              | <i>J&amp;K</i> (Beijing, China)                |
| Boc-L-proline                              | <i>GL Biochem</i> (Shanghai, China)            |
| Boc-L-hydroxyproline                       | <i>Bidepharm</i> (Shanghai, China)             |
| L-phenyllactic acid                        | <i>Konoscience</i> (Beijing, China)            |
| mandelic acid                              | <i>J&amp;K</i> (Beijing, China)                |
| $\beta$ -alanine                           | <i>9dingchem</i> (Shanghai, China)             |
| $\beta$ -aminobutyric acid                 | <i>MREDA</i> (Beijing, China)                  |
| L-aspartic acid $\beta$ -methyl ester      | <i>Konoscience</i> (Beijing, China)            |
| L-aspartic acid $\beta$ -methyl ester      | <i>Konoscience</i> (Beijing, China)            |
| 3-amino-3-( <i>p</i> -tolyl)propanoic acid | <i>Konoscience</i> (Beijing, China)            |

| Reagent                                  | Manufactory          |
|------------------------------------------|----------------------|
| 3-amino-3-(4-chlorophenyl)propanoic acid | OKA (Beijing, China) |

#### Content of water of solvents

| Entry                                                                                                                     | Content of water in ppm |
|---------------------------------------------------------------------------------------------------------------------------|-------------------------|
| THF- <i>d</i> <sub>8</sub> used in Figure 1A (CIL Inc)                                                                    | < 200 ppm               |
| THF used for NCA preparation and recrystallization (analytical grade, <i>Concord Technology Inc.</i> (Tianjin, China))    | < 2040 ppm              |
| DMF used for PLG preparation (anhydrous, 99.8%, <i>Sigma-Aldrich, Merck, (Germany)</i> )                                  | < 200 ppm               |
| ACN used for NCA preparation and recrystallization (analytical grade, <i>Concord Technology Inc.</i> (Tianjin, China))    | < 1100 ppm              |
| PE used for recrystallization and column chromatography (analytical grade, <i>Tong Guang Chem. Inc.</i> , Beijing, China) | < 700 ppm               |
| Ethyl acetate used for column chromatography (analytical grade, <i>Tong Guang Chem. Inc.</i> , Beijing, China)            | < 2300 ppm              |

## Characterizations

Nuclear magnetic resonance (NMR) spectra were measured on Bruker AVANCE III 400 ( $^1\text{H}$  at 400 MHz;  $^{13}\text{C}$  at 101 MHz) or Bruker AVANCE III HD 400 ( $^1\text{H}$  at 400 MHz;  $^{13}\text{C}$  at 101 MHz) NMR spectrometers.  $^1\text{H}$  NMR spectra data are reported as follows: chemical shift  $\delta$  (ppm) referenced to either  $\text{CDCl}_3$  (7.26 ppm),  $\text{THF-}d_8$  (1.72 ppm),  $\text{DMSO-}d_6$  (2.50 ppm) or  $\text{D}_2\text{O}$  (4.79 ppm), multiplicity (s = singlet, d = doublet, t = triplet, q = quartet, m = multiplet, dd = doublet of doublets, dt = doublet of triplets, ddd = doublet of doublet of doublets), coupling constant  $J$  (Hz), and integration.  $^{13}\text{C}$  NMR spectra data are reported as follows: chemical shift  $\delta$  (ppm) referenced to either  $\text{CDCl}_3$  (77.16 ppm),  $\text{DMSO-}d_6$  (39.52 ppm),  $\text{THF-}d_8$  (25.31 ppm) or tetramethylsilane (TMS, 0.00 ppm). High-resolution mass spectrometry (HRMS) data were recorded on Bruker Apex IV or Bruker Solarix XR fourier transform ion cyclotron resonance (FTICR) mass spectrometers (electrospray ionization, ESI). To obtain the absolute molecular weight ( $M_n$ ) and dispersity ( $\mathcal{D}$ ) of PLG, the aqueous SEC was performed on an ÄKTA equipped with a differential refractive index detector Optilab T-rEX (658.0 nm) and a light scattering detector miniDAWN TREOS (Wyatt, USA). The  $dn/dc$  value of PLG in PBS was measured as  $0.1184 \pm 0.002859$  mL/g.

## Glassware

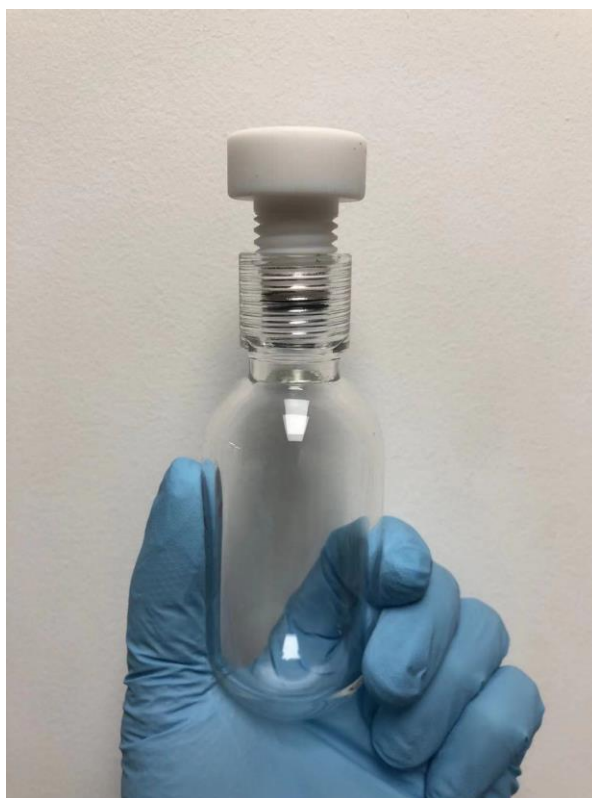

**!!!NOTE:** Pressure vessel with heavy wall was recommended to prevent potential phosgene and PO leakage/escape.

### 3b: L-Cbz-Lysine NCA

Air humidity: 56%

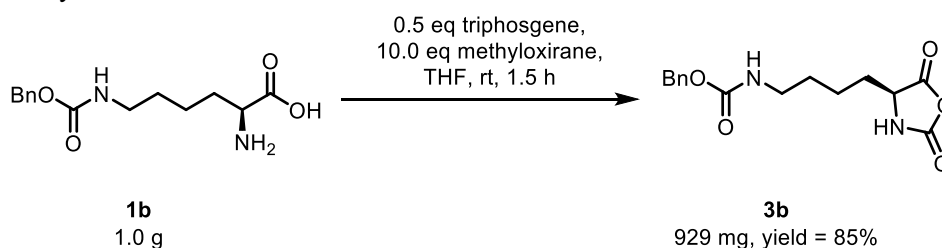

To a pressure vessel with heavy wall, Cbz - L-lysine **1b** (1.0 g, 3.6 mmol, 1.0 eq), THF (15 mL), methyloxirane (2.5 mL, 36 mmol, 10.0 eq) were added sequentially under magnetic stirring. Triphosgene (534 mg, 1.8 mmol, 0.5 eq) was finally added in one portion and the vessel was sealed immediately. The reaction was stirred at room temperature for ~1.5 h in total and cooled down to ~4 °C in an ice bath. **For safety reason, the excessive triphosgene** was quenched by adding 10 mL **cold water** at ~4 °C with 1-3 min stirring. The mixture was extracted with ethyl acetate (EA, 20 mL × 2) at room temperature. The combined organic phase was washed with brine and dried with anhydrous Na<sub>2</sub>SO<sub>4</sub>. After the removal of solvent by rotatory evaporation *in vacuum under 45 °C*, the crude product was purified by crystallization in hexane/THF **below 10 °C (preferably in a cold room)** without N<sub>2</sub> protection. The pure product **3b** was obtained as a white crystal (929 mg, yield =

85%). The NCA was stored at -10 °C for 2 months.

**<sup>1</sup>H NMR** (400 MHz, DMSO-*d*<sub>6</sub>) δ 9.08 (s, 1H), 7.40 – 7.28 (m, 5H), 7.26 (t, *J* = 6.1 Hz, 1H), 5.00 (s, 2H), 4.43 (dd, *J* = 7.4, 5.1 Hz, 1H), 2.99 (dt, *J* = 6.1, 6.1 Hz, 2H), 1.80 – 1.58 (m, 1H), 1.48 – 1.22 (m, 4H).

**<sup>13</sup>C NMR** (101 MHz, DMSO-*d*<sub>6</sub>) δ 171.7, 156.1, 152.0, 137.3, 128.4, 127.8, 127.8, 124.2, 65.2, 57.0, 30.7, 28.8, 21.6.

**HRMS** (ESI-FTICR, *m/z*): [M + H]<sup>+</sup> calculated for C<sub>15</sub>H<sub>19</sub>N<sub>2</sub>O<sub>5</sub><sup>+</sup>: 307.1288; found: 307.1287.

**FT-IR** (cm<sup>-1</sup>) 3340, 1857, 1775.

### 3c: ε-trifluoroacetyl L-lysine NCA

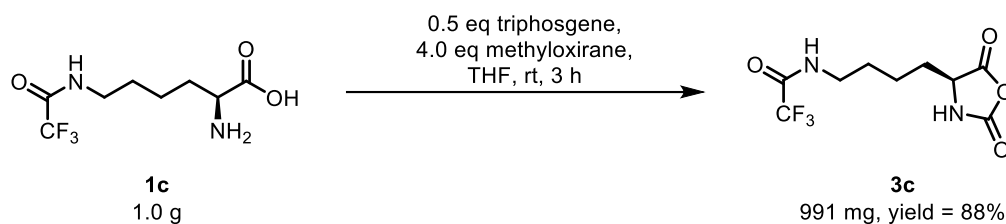

To a pressure vessel with heavy wall, ε-trifluoroacetyl L-lysine **1c** (1.0 g, 4.2 mmol, 1.0 eq), THF (20 mL), methyloxirane (1.2 mL, 17.2 mmol, 4.0 eq) were added sequentially under magnetic stirring. Triphosgene (624 mg, 2.1 mmol, 0.5 eq) was finally added in one portion and the vessel was sealed immediately. The reaction was stirred at room temperature for ~3 h in total. After the removal of solvent by rotatory evaporation *in vacuum under 45 °C*, the crude product was purified by crystallization in hexane/THF **below 10 °C (preferably in a cold room)** without N<sub>2</sub> protection. The pure product **3c** was obtained as a white crystal (991 mg, yield = 88%). The NCA was stored at -10 °C for 2 months.

**<sup>1</sup>H NMR** (400 MHz, DMSO-*d*<sub>6</sub>) δ 9.42 (t, *J* = 6.5 Hz, 1H), 9.10 (s, 1H), 4.43 (t, *J* = 6.5 Hz, 1H), 3.17 (q, *J* = 6.5 Hz, 2H), 1.75 (ddt, *J* = 15.5, 10.6, 5.2 Hz, 1H), 1.69 – 1.59 (m, 1H), 1.49 (p, *J* = 7.4 Hz, 2H), 1.43 – 1.34 (m, 1H), 1.34 – 1.21 (m, 1H).

**<sup>13</sup>C NMR** (101 MHz, DMSO-*d*<sub>6</sub>) δ 171.7, 156.8, 156.4, 156.0, 155.7, 152.0, 120.3, 117.4, 114.6, 111.7, 57.0, 30.6, 27.7, 21.6.

**HRMS** (ESI-FTICR, *m/z*): [M + H]<sup>+</sup> calculated for C<sub>9</sub>H<sub>12</sub>F<sub>3</sub>N<sub>2</sub>O<sub>4</sub><sup>+</sup>: 269.0744; found: 269.0737.

**FT-IR** (cm<sup>-1</sup>) 1857, 1792, 1725.

### 3d: L-Alanine NCA

Air humidity: 68%

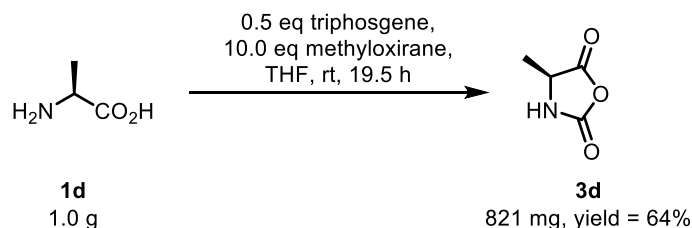

To a pressure vessel with heavy wall, L-alanine **1d** (1.0 g, 11.2 mmol, 1.0 eq), THF (30 mL), methyloxirane (8.0 mL, 112.2 mmol, 10.0 eq) were added sequentially under magnetic stirring.

Triphosgene (1.7 g, 5.6 mmol, 0.5 eq) was finally added in one portion and the vessel was sealed immediately. The reaction was stirred at room temperature for ~19.5 h in total and cooled down to ~ 4 °C in an ice bath. **For safety reason, the excessive triphosgene** was quenched by adding 10 mL **cold water** at ~ 4 °C with 1-3 min stirring. The mixture was extracted with ethyl acetate (EA, 20 mL × 2) at room temperature. The combined organic phase was washed with brine and dried with anhydrous Na<sub>2</sub>SO<sub>4</sub>. After the removal of solvent by rotatory evaporation *in vacuum*, the crude product was purified by crystallization in hexane/THF **below 10 °C (preferably in a cold room)** without N<sub>2</sub> protection. The pure product **3d** was obtained as white needle crystal (821 mg, yield = 64%). The NCA was stored at -10 °C for 2 months.

<sup>1</sup>H NMR (400 MHz, CDCl<sub>3</sub>) δ 6.76 (br, 1H), 4.42 (qd, *J* = 7.0, 1.0 Hz, 1H), 1.56 (d, *J* = 7.0 Hz, 3H).

<sup>13</sup>C NMR (101 MHz, CDCl<sub>3</sub>) δ 170.3, 152.6, 53.5, 17.8.

HRMS (ESI-FTICR, *m/z*): [M + NH<sub>4</sub>]<sup>+</sup> calculated for C<sub>4</sub>H<sub>9</sub>N<sub>2</sub>O<sub>3</sub><sup>+</sup>: 133.0608; found: 133.0607.

FT-IR (cm<sup>-1</sup>) 3184, 1858, 1790.

### 3e: L-Phenylalanine NCA

Air humidity: 63%

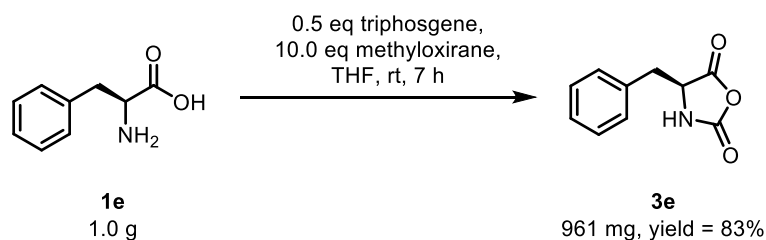

To a pressure vessel with heavy wall, L-phenylalanine **1e** (1.0 g, 6.1 mmol, 1.0 eq), THF (15 mL), methyloxirane (4.3 mL, 60 mmol, 10.0 eq) were added sequentially under magnetic stirring. Triphosgene (897 mg, 4.0 mmol, 0.5 eq) was finally added in one portion and the vessel was sealed immediately. The reaction was stirred at room temperature for 7 h in total and cooled down to ~ 4 °C in an ice bath. **For safety reason, excessive triphosgene** was quenched by adding 10 mL **cold water** at ~ 4 °C with 1-3 min stirring. The mixture was extracted with ethyl acetate (EA, 20 mL × 2) at room temperature. The combined organic phase was washed with brine and dried with anhydrous Na<sub>2</sub>SO<sub>4</sub>. After the removal of solvent by rotatory evaporation *in vacuum under 45 °C*, the crude product was purified by crystallization in hexane/THF **below 10 °C (preferably in a cold room)** without N<sub>2</sub> protection. The pure product **3e** was obtained as a white needle crystal (961 mg, yield = 83%). The NCA was stored at -10 °C for 2 months.

<sup>1</sup>H NMR (400 MHz, CDCl<sub>3</sub>) δ 7.38 – 7.27 (m, 3H), 7.17 (dd, *J* = 7.7, 1.8 Hz, 2H), 6.48 (br, 1H), 4.53 (ddd, *J* = 7.8, 4.3, 1.0 Hz, 1H), 3.24 (dd, *J* = 14.2, 4.3 Hz, 1H), 3.01 (dd, *J* = 14.2, 7.8 Hz, 1H).

<sup>13</sup>C NMR (101 MHz, CDCl<sub>3</sub>) δ 168.9, 152.1, 134.0, 129.3, 128.1, 59.0, 37.9.

HRMS (ESI-FTICR, *m/z*): [M + NH<sub>4</sub>]<sup>+</sup> calculated for C<sub>10</sub>H<sub>13</sub>N<sub>2</sub>O<sub>3</sub><sup>+</sup>: 209.0921; found: 209.0919.

FT-IR (cm<sup>-1</sup>) 1848, 1775.

### 3f: L-valine NCA

Air humidity: 45%

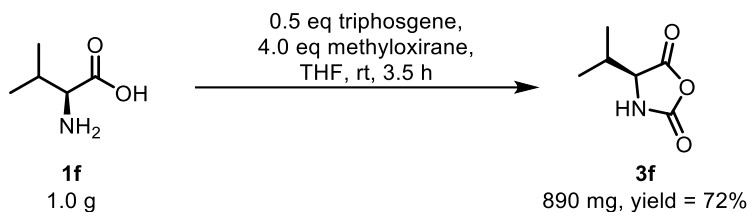

To a pressure vessel with heavy wall, L-valine **1f** (1.0 g, 8.6 mmol, 1.0 eq), THF (20 mL), methyloxirane (2.4 mL, 34.3 mmol, 4.0 eq) were added sequentially under magnetic stirring. Triphosgene (1.3 g, 4.4 mmol, 0.5 eq) was finally added in one portion and the vessel was sealed immediately. The reaction was stirred at room temperature for 3.5 h in total and cooled down to ~ 4 °C in an ice bath. **For safety reason, the excessive triphosgene** was quenched by adding 10 mL **cold water** at ~ 4 °C with 1-3 min stirring. The mixture was extracted with ethyl acetate (EA, 20 mL × 2) at room temperature. The combined organic phase was washed with brine and dried with anhydrous Na<sub>2</sub>SO<sub>4</sub>. After the removal of solvent by rotatory evaporation *in vacuum under 45 °C*, the crude product was purified by crystallization in hexane/THF **below 10 °C (preferably in a cold room)** without N<sub>2</sub> protection. The pure product **3f** was obtained as a white needle crystal (890 mg, yield = 72%). The NCA was stored at -10 °C for 2 months.

<sup>1</sup>H NMR (400 MHz, CDCl<sub>3</sub>) δ 6.85 (br, 1H), 4.22 (dd, *J* = 4.2, 1.0 Hz, 1H), 2.25 (heptd, *J* = 6.9, 4.2 Hz, 1H), 1.08 (d, *J* = 6.9 Hz, 3H), 1.03 (d, *J* = 6.9 Hz, 3H).

<sup>13</sup>C NMR (101 MHz, CDCl<sub>3</sub>) δ 169.1, 153.7, 63.2, 30.9, 18.3, 16.7.

HRMS (ESI-FTICR, *m/z*): [M + H]<sup>+</sup> calculated for C<sub>6</sub>H<sub>10</sub>NO<sub>3</sub><sup>+</sup>: 144.0655; found: 144.0656.

FT-IR (cm<sup>-1</sup>) 3296, 1839, 1752.

### 3g: L- leucine NCA

Air humidity: 45%

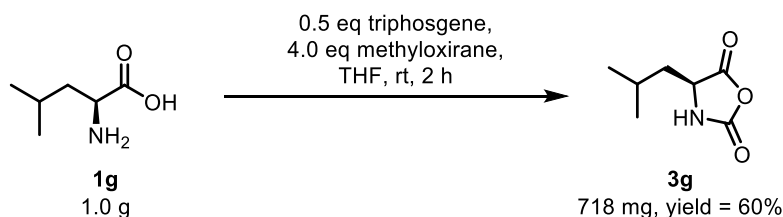

To a pressure vessel with heavy wall, L-leucine **1g** (1.0 g, 7.7 mmol, 1.0 eq), THF (20 mL), methyloxirane (30 mL, 39.0 mmol, 4.0 eq) were added sequentially under magnetic stirring. Triphosgene (1.2 g, 3.9 mmol, 0.5 eq) was finally added in one portion and the vessel was sealed immediately. The reaction was stirred at room temperature for 2 h in total and cooled down to ~ 4 °C in an ice bath. **For safety reason, the excessive triphosgene** was quenched by adding 10 mL **cold water** at ~ 4 °C with 1-3 min stirring. The mixture was extracted with ethyl acetate (EA, 20 mL × 2) at room temperature. The combined organic phase was washed with brine and dried with anhydrous Na<sub>2</sub>SO<sub>4</sub>. After the removal of solvent by rotatory evaporation *in vacuum under 45 °C*, the crude product was purified by crystallization in hexane/THF **below 10 °C (preferably in a cold room)** without N<sub>2</sub> protection. The pure product **3g** was obtained as a white needle crystal (718 mg, yield = 60%). The NCA was stored at -10 °C for 2 months.



**<sup>1</sup>H NMR** (400 MHz, DMSO-*d*<sub>6</sub>) δ 9.13 (br, 1H), 4.45 (dd, *J* = 8.7, 5.5 Hz, 1H), 1.81 – 1.65 (m, 1H), 1.65 – 1.49 (m, 2H), 0.92 – 0.85 (m, 6H).

**<sup>13</sup>C NMR** (101 MHz, DMSO-*d*<sub>6</sub>) δ 172.1, 152.0, 55.6, 40.1, 24.2, 22.8, 21.2.

**HRMS** (ESI-FTICR, *m/z*): [M + Na]<sup>+</sup> calculated for C<sub>7</sub>H<sub>11</sub>NNaO<sub>3</sub><sup>+</sup>: 180.0631; found: 180.0632.

**FT-IR** (cm<sup>-1</sup>) 1828, 1787.

### 3h: L-Tryptophan NCA

Air humidity: 43%

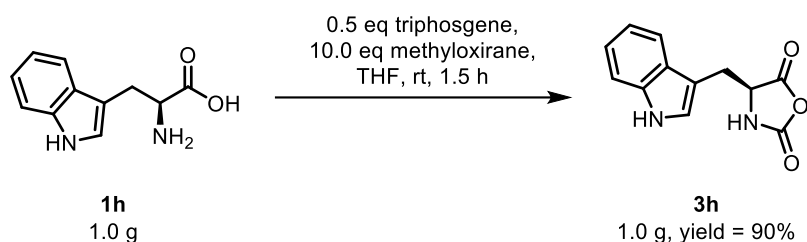

To a pressure vessel with heavy wall, L-tryptophan **1h** (1.0 g, 4.9 mmol, 1.0 eq), THF (15 mL), methyloxirane (3.4 mL, 49 mmol, 10.0 eq) were added sequentially under magnetic stirring. The triphosgene (749 mg, 2.5 mmol, 0.5 eq) was finally added in one portion and the vessel was sealed immediately. The reaction was stirred at room temperature for 1.5 h in total and cooled down to ~ 4 °C in an ice bath. **For safety reason, excessive triphosgene** was quenched by adding 15 mL **cold water** at ~ 4 °C with 1-3 min stirring. The mixture was extracted with ethyl acetate (EA, 20 mL × 2) at room temperature. The combined organic phase was washed with brine and dried with anhydrous Na<sub>2</sub>SO<sub>4</sub>. After the removal of solvent by rotatory evaporation *in vacuum under 35 °C*, the crude product was purified by crystallization in hexane/THF **below 10 °C (preferably in a cold room)** without N<sub>2</sub> protection. The pure product **3h** was obtained as a crystal (1.0 g, yield = 90%). The NCA was stored at -10 °C for 2 months.

**<sup>1</sup>H NMR** (400 MHz, DMSO-*d*<sub>6</sub>) δ 11.00 (d, *J* = 2.5 Hz, 1H), 9.09 (s, 1H), 7.55 (d, *J* = 7.9 Hz, 1H), 7.36 (d, *J* = 8.1 Hz, 1H), 7.15 (d, *J* = 2.5 Hz, 1H), 7.13 – 7.05 (m, 1H), 7.05 – 6.96 (m, 1H), 4.78 (t, *J* = 5.0 Hz, 1H), 3.22 (dd, *J* = 15.0, 5.0 Hz, 1H), 3.14 (dd, *J* = 15.0, 5.0 Hz, 1H).

**<sup>13</sup>C NMR** (101 MHz, DMSO-*d*<sub>6</sub>) δ 171.3, 151.9, 136.0, 127.2, 124.5, 121.1, 118.6, 118.5, 111.5, 107.1, 58.3, 26.5.

**HRMS** (ESI-FTICR, *m/z*): [M + H]<sup>+</sup> calculated for C<sub>12</sub>H<sub>11</sub>N<sub>2</sub>O<sub>3</sub><sup>+</sup>: 231.0764; found: 231.0763.

**FT-IR** (cm<sup>-1</sup>) 3416, 1854, 1775.

### 3i: L-Tyrosine NCA

Air humidity: 63%

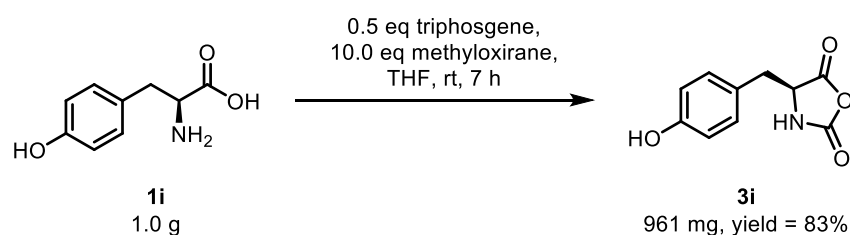

To a pressure vessel with heavy wall, L-tyrosine **1i** (1.0 g, 6.1 mmol, 1.0 eq), THF (15 mL), methyloxirane (4.3 mL, 61 mmol, 10.0 eq) were added sequentially under magnetic stirring.

Triphosgene (897 mg, 3.0 mmol, 0.5 eq) was finally added in one portion and the vessel was sealed immediately. The reaction was stirred at room temperature for 7 h in total and cooled down to ~ 4 °C in an ice bath. **For safety reason, the excessive triphosgene** was quenched by adding 10 mL **cold water** at ~ 4 °C with 1-3 min stirring. The mixture was extracted with ethyl acetate (EA, 20 mL × 2) at room temperature. The combined organic phase was washed with brine and dried with anhydrous Na<sub>2</sub>SO<sub>4</sub>. After the removal of solvent by rotatory evaporation *in vacuum under 45 °C*, the crude product was purified by crystallization in hexane/THF **below 10 °C (preferably in a cold room)** without N<sub>2</sub> protection. The pure product **3i** was obtained as a white needle crystal (961 mg, yield = 83%). The NCA was stored at -10 °C for 2 months.

<sup>1</sup>H NMR (400 MHz, DMSO-*d*<sub>6</sub>) δ 9.34 (br, 1H), 9.03 (br, 1H), 6.97 (d, *J* = 8.4 Hz, 2H), 6.69 (d, *J* = 8.4 Hz, 2H), 4.70 (td, *J* = 5.0, 1.0 Hz, 1H), 2.93 (dd, *J* = 14.5, 5.0 Hz, 1H), 2.89 (dd, *J* = 14.5, 5.0 Hz, 1H).

<sup>13</sup>C NMR (101 MHz, DMSO-*d*<sub>6</sub>) δ 170.9, 156.5, 151.7, 130.7, 124.6, 115.2, 58.5, 35.5.

HRMS (ESI-FTICR, *m/z*): [M + NH<sub>4</sub>]<sup>+</sup> calculated for C<sub>10</sub>H<sub>13</sub>N<sub>2</sub>O<sub>4</sub><sup>+</sup>: 225.0870; found: 225.0869.

FT-IR (cm<sup>-1</sup>) 3305, 1857, 1763.

### 3j: Glycine NCA

Air humidity: 78%

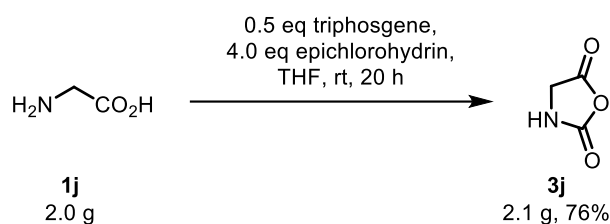

To a pressure vessel with heavy wall, glycine **1j** (2.0 g, 26.8 mmol, 1.0 eq), THF (80 mL), epichlorohydrin (8.4 mL, 107.1 mmol, 4.0 eq) were added sequentially under magnetic stirring. Triphosgene (4.0 g, 13.5 mmol, 0.5 eq) was finally added in one portion and the vessel was sealed immediately. The reaction was stirred at room temperature for 20 h in total. After the removal most of solvent by rotatory evaporation *in vacuum under 45 °C*, the crude product was purified by crystallization in PE/THF **below 10 °C (preferably in a cold room)** without N<sub>2</sub> protection. The pure product **3j** was obtained as a white powder (2.1 g, yield = 76%). The NCA was stored at -10 °C for 2 months.

<sup>1</sup>H NMR (400 MHz, DMSO-*d*<sub>6</sub>) δ 8.83 (s, 1H), 4.18 (s, 2H).

<sup>13</sup>C NMR (101 MHz, DMSO-*d*<sub>6</sub>) δ 169.4, 153.0, 46.3.

FT-IR (cm<sup>-1</sup>) 1863, 1790.

### 3k: EG<sub>3</sub>-GluNCA

Air humidity: 66%

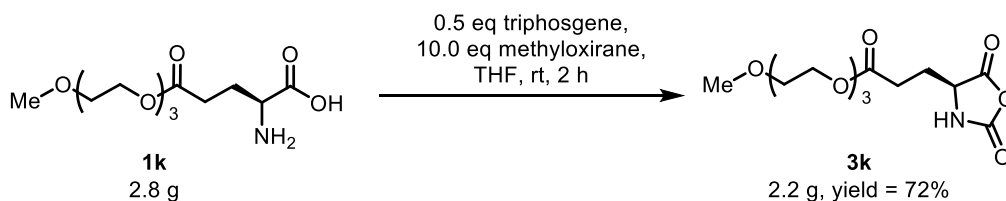

To a pressure vessel with heavy wall,  $\gamma$ -(2-(2-(2-methoxyethoxy)ethoxy)ethyl) L-glutamate **1k** (2.8 g, 9.6 mmol, 1.0 eq), THF (50 mL), methyloxirane (6.7 mL, 96.1 mmol, 10.0 eq) were added sequentially under magnetic stirring. Triphosgene (1.5 g, 4.8 mmol, 0.5 eq) was finally added in one portion and the vessel was sealed immediately. The reaction was stirred at room temperature for 2 h. (**This NCA cannot be washed with water!!!**) After the removal of solvent by rotatory evaporation *in vacuum under 50 °C*, the crude product was purified by flash column chromatography (PE/EA = 5:1 ~ EA). The pure product **3k** was obtained as a colorless oil (2.2 g, yield = 72%). The NCA was stored at -30 °C for 1 month.

**<sup>1</sup>H NMR** (400 MHz, DMSO-*d*<sub>6</sub>)  $\delta$  9.09 (br, 1H), 4.46 (ddd,  $J = 7.9, 5.4, 1.2$  Hz, 1H), 4.20 – 4.07 (m, 2H), 3.60 (dd,  $J = 5.3, 4.2$  Hz, 2H), 3.57 – 3.47 (m, 5H), 3.46 – 3.39 (m, 2H), 3.24 (s, 3H), 2.47 (t,  $J = 7.6$  Hz, 2H), 2.10 – 1.96 (m, 1H), 1.99 – 1.83 (m, 1H).

**<sup>13</sup>C NMR** (101 MHz, DMSO-*d*<sub>6</sub>)  $\delta$  171.8, 171.4, 151.9, 71.3, 69.8, 69.7, 69.6, 68.2, 63.5, 58.1, 56.2, 29.1, 26.5.

**HRMS** (ESI-FTICR,  $m/z$ ):  $[M + H]^+$  calculated for C<sub>13</sub>H<sub>22</sub>NO<sub>8</sub><sup>+</sup>: 320.1340; found: 320.1339.

**FT-IR** (cm<sup>-1</sup>) 1855, 1782.

### 3l: L-Methionine NCA

Air humidity: 60%

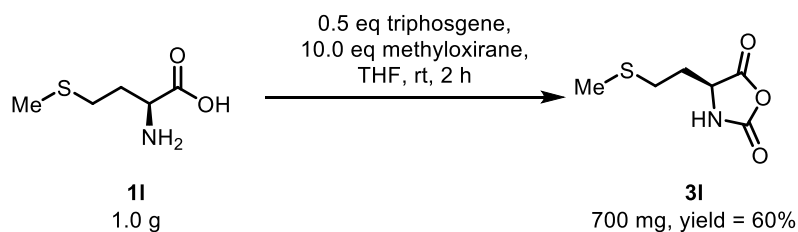

To a pressure vessel with heavy wall, L-methionine **1l** (1.0 g, 6.7 mmol, 1.0 eq), THF (20 mL), methyloxirane (4.7 mL, 67 mmol, 10.0 eq) were added sequentially under magnetic stirring. Triphosgene (1.0 g, 3.4 mmol, 0.5 eq) was finally added in one portion and the vessel was sealed immediately. The reaction was stirred at room temperature for 2 h in total and cooled down to ~ 4 °C in an ice bath. **For safety reason, the excessive triphosgene** was quenched by adding 15 mL **cold water** at ~ 4 °C with 1-3 min stirring. The mixture was extracted with ethyl acetate (EA, 20 mL  $\times$  2) at room temperature. The combined organic phase was washed with brine and dried with anhydrous Na<sub>2</sub>SO<sub>4</sub>. After the removal of solvent by rotatory evaporation *in vacuum under 45 °C*, the crude product was purified by flash column chromatography (PE/EA = 5:1 ~ EA). The pure product **3l** was obtained as a colorless oil (700 mg, yield = 60%). The NCA was stored at -20 °C for 1 month.

**<sup>1</sup>H NMR** (400 MHz, CDCl<sub>3</sub>)  $\delta$  7.06 (br, 1H), 4.51 (ddd,  $J = 7.4, 5.0, 1.1$  Hz, 1H), 2.67 (t,  $J = 6.6$  Hz, 2H), 2.25 (dtd,  $J = 14.6, 6.6, 5.0$  Hz, 1H), 2.17 – 2.01 (m, 1H), 2.09 (s, 3H).

$^{13}\text{C}$  NMR (101 MHz,  $\text{CDCl}_3$ )  $\delta$  169.9, 152.9, 56.7, 30.2, 29.8, 15.2.

HRMS (ESI-FTICR,  $m/z$ ):  $[\text{M} + \text{H}]^+$  calculated for  $\text{C}_6\text{H}_{10}\text{NO}_3\text{S}^+$ : 176.0376; found: 176.0375.

FT-IR ( $\text{cm}^{-1}$ ) 1854, 1787.

### 3m: pOEt-TyrNCA

Air humidity: 32%

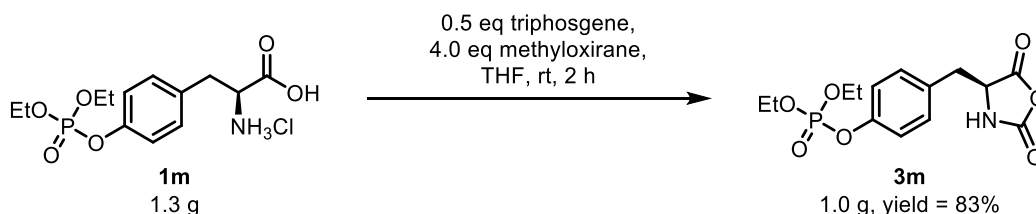

To a pressure vessel with heavy wall, *O*-diethylphospho L-tyrosine<sup>[1]</sup> **1m** (1.3 g, 3.8 mmol, 1.0 eq), THF (20 mL), methyloxirane (2.7 mL, 38.6 mmol, 10.0 eq) were added sequentially under magnetic stirring. Triphosgene (908 mg, 3.1 mmol, 0.8 eq) was finally added in one portion and the vessel was sealed immediately. The reaction was stirred at room temperature for 2 h. (**This NCA cannot be washed with water!!!**) After the removal of solvent by rotatory evaporation *in vacuum under 45 °C*, the crude product was purified by flash column chromatography (PE/EA = 5:1 ~ 1:1 ~ EA). The pure product **3m** was obtained as a yellow oil (1.0 g, yield = 83%). The NCA was stored at -20 °C.

$^1\text{H}$  NMR (400 MHz,  $\text{DMSO-}d_6$ )  $\delta$  9.11 (s, 1H), 7.22 (d,  $J = 8.2$  Hz, 2H), 7.16 (d,  $J = 8.2$  Hz, 2H), 4.77 (t,  $J = 5.3$  Hz, 1H), 4.19 – 4.08 (m, 4H), 3.03 (d,  $J = 5.3$  Hz, 2H), 1.24 (t,  $J = 7.1$  Hz, 6H).

$^{13}\text{C}$  NMR (101 MHz,  $\text{DMSO-}d_6$ )  $\delta$  170.8, 151.7, 149.6, 149.5, 131.7, 131.2, 119.9, 119.9, 64.4, 64.3, 58.2, 35.6, 15.9, 15.9.

HRMS (ESI-FTICR,  $m/z$ ):  $[\text{M} + \text{H}]^+$  calculated for  $\text{C}_{14}\text{H}_{19}\text{NO}_7\text{P}^+$ : 344.0894; found: 344.0891.

FT-IR ( $\text{cm}^{-1}$ ) 1857, 1790, 1740.

### 3n: *t*Bu-SerNCA

Air humidity: 80%

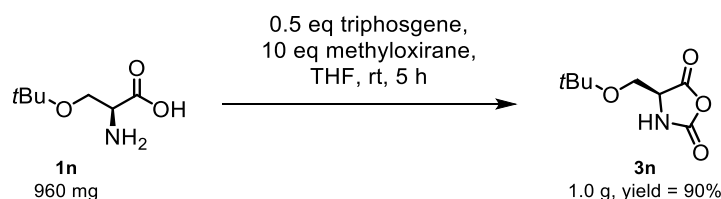

To a pressure vessel with heavy wall, *O-tert*-butyl L-serine **1n** (960 mg, 6.0 mmol, 1.0 eq), THF (50 mL), methyloxirane (4.2 mL, 59.6 mmol, 10.0 eq) were added sequentially under magnetic stirring. Triphosgene (930 mg, 3.1 mmol, 0.5 eq) was finally added in one portion and the vessel was sealed immediately. The reaction was stirred at room temperature for 5 h. (**This NCA cannot be washed with water!!!**). After the removal of solvent by rotatory evaporation *in vacuum under 35 °C*, the crude product was purified by flash column chromatography (PE/EA = 5:1 ~ EA). The pure product **3n** was obtained as a colorless oil (1.0 g, yield = 90%). The NCA was stored at -20 °C for 1 week.

$^1\text{H}$  NMR (400 MHz,  $\text{DMSO-}d_6$ )  $\delta$  8.95 (br, 1H), 4.57 (dt,  $J = 2.8, 1.5$  Hz, 1H), 3.62 (dd,  $J = 10.3,$

2.8 Hz, 1H), 3.50 (dd,  $J = 10.3, 2.8$  Hz, 1H), 1.10 (s, 9H).

$^{13}\text{C}$  NMR (101 MHz, DMSO- $d_6$ )  $\delta$  170.2, 152.3, 73.2, 59.9, 58.6, 27.1.

HRMS (ESI-FTICR,  $m/z$ ):  $[\text{M} + \text{NH}_4]^+$  calculated for  $\text{C}_8\text{H}_{17}\text{N}_2\text{O}_4^+$ : 205.1183; found: 205.1179.

FT-IR ( $\text{cm}^{-1}$ ) 1778, 1749.

### 3o: $\epsilon$ -N-Boc L-lysine NCA

Air humidity: 48%

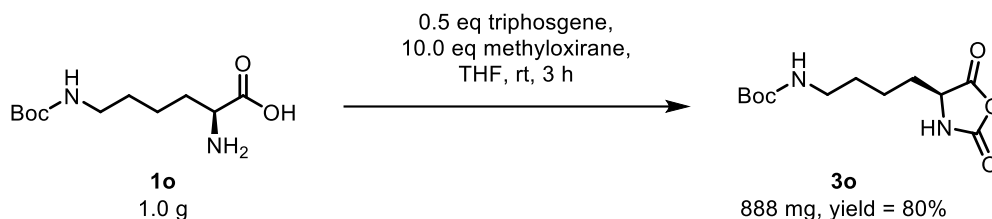

To a pressure vessel with heavy wall,  $\epsilon$ -N-Boc L-lysine **1o** (1.0 g, 4.1 mmol, 1.0 eq), THF (20 mL), methyloxirane (2.8 mL, 40.6 mmol, 10.0 eq) were added sequentially under magnetic stirring. Triphosgene (620 mg, 2.1 mmol, 0.5 eq) was finally added in one portion and the vessel was sealed immediately. The reaction was stirred at room temperature for 3 h in total. **For safety reason, the excessive triphosgene** was quenched by adding 10 mL **cold water** at  $\sim 4$  °C with 1-3 min stirring. The mixture was extracted with ethyl acetate (EA, 20 mL  $\times$  2) at room temperature. The combined organic phase was washed with brine and dried with anhydrous  $\text{Na}_2\text{SO}_4$ . After the removal of solvent by rotatory evaporation *in vacuum under 45 °C*, the crude product was purified by crystallization in hexane/THF **below 10 °C (preferably in a cold room)** without  $\text{N}_2$  protection. The pure product **3o** was obtained as a white crystal (888 mg, yield = 80%). The NCA was stored at -10 °C for 1 month.

$^1\text{H}$  NMR (400 MHz, DMSO- $d_6$ )  $\delta$  9.07 (br, 1H), 6.79 (t,  $J = 6.0$  Hz, 1H), 4.42 (dd,  $J = 7.3, 5.2$  Hz, 1H), 2.89 (q,  $J = 6.0$  Hz, 2H), 1.78 – 1.57 (m, 2H), 1.37 (s, 9H), 1.43 – 1.19 (m, 4H).

$^{13}\text{C}$  NMR (101 MHz, DMSO- $d_6$ )  $\delta$  171.7, 155.6, 152.0, 77.4, 57.0, 30.6, 28.9, 28.3, 21.6.

HRMS (EI,  $m/z$ ):  $[\text{M}]^+$  calculated for  $\text{C}_{12}\text{H}_{21}\text{N}_2\text{O}_5^+$ : 273.1445; found: 273.1447.

FT-IR ( $\text{cm}^{-1}$ ) 1855, 1782, 1689.

### 3p: L-Serine NCA

Air humidity: 40%

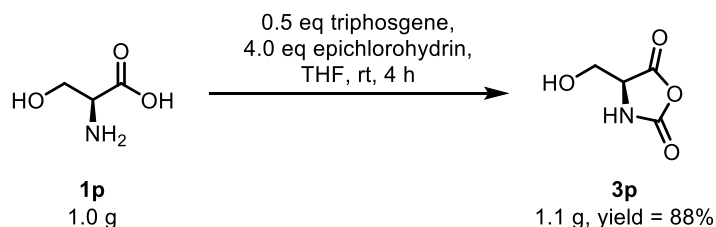

To a pressure vessel with heavy wall, L-serine **1p** (1.0 g, 9.5 mmol, 1.0 eq), THF (20 mL), epichlorohydrin (3.0 mL, 38.1 mmol, 4.0 eq) were added sequentially under magnetic stirring. Triphosgene (1.4 g, 4.8 mmol, 0.5 eq) was finally added in one portion and the vessel was sealed immediately. The reaction was stirred at room temperature for 4 h. **(This NCA cannot be washed with water!!!)** After filtration and the removal of solvent by rotatory evaporation *in vacuum under 45 °C*, the crude product was purified by crystallization in hexane/THF **below 10 °C (preferably in**

a cold room) without N<sub>2</sub> protection. The pure product **3p** was obtained as a colorless crystal (1.1 g, yield = 88%). The NCA was stored at -20 °C for 1 month.

<sup>1</sup>H NMR (400 MHz, THF-*d*<sub>8</sub>) δ 7.88 (br, 1H), 4.65 (dd, *J* = 6.4, 4.8 Hz, 1H), 4.32 (t, *J* = 3.3 Hz, 1H), 3.81 (ddd, *J* = 11.5, 6.4, 3.3 Hz, 1H), 3.70 (ddd, *J* = 11.5, 4.8, 3.3 Hz, 1H)..

<sup>13</sup>C NMR (101 MHz, THF) δ 170.6, 153.6, 61.6, 61.5.

FT-IR (cm<sup>-1</sup>) 3480, 1851, 1772.

### 3q: L-Threonine NCA

Air humidity: 58%

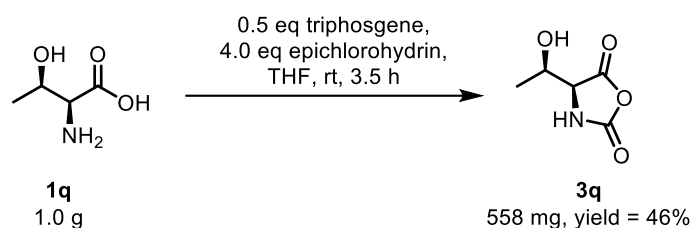

To a pressure vessel with heavy wall, L-threonine **1q** (1.0 g, 8.4 mmol, 1.0 eq), THF (20 mL), epichlorohydrin (2.6 mL, 33.6 mmol, 4.0 eq) were added sequentially under magnetic stirring. Triphosgene (1.3 g, 4.2 mmol, 0.5 eq) was finally added in one portion and the vessel was sealed immediately. The reaction was stirred at room temperature for 5 h in total. After filtration and the removal of solvent by rotatory evaporation *in vacuum under 45 °C*, the crude product was purified by crystallization in hexane/THF **below 10 °C (preferably in a cold room)** without N<sub>2</sub> protection. The pure product **3q** was obtained as a colorless crystal (558 mg, yield = 46%). The NCA was stored at -20 °C for 1 month.

<sup>1</sup>H NMR (400 MHz, DMSO-*d*<sub>6</sub>) δ 9.05 (br, 1H), 5.17 (br, 1H), 4.32 (dd, *J* = 2.3, 1.1 Hz, 1H), 3.98 (qd, *J* = 6.6, 2.3 Hz, 1H), 1.14 (d, *J* = 6.6 Hz, 3H).

<sup>13</sup>C NMR (101 MHz, DMSO-*d*<sub>6</sub>) δ 170.5, 152.7, 65.4, 63.7, 19.9.

HRMS (ESI-FTICR, *m/z*): [M + H]<sup>+</sup> calculated for C<sub>5</sub>H<sub>8</sub>NO<sub>4</sub><sup>+</sup>: 146.0448; found: 146.0446.

FT-IR (cm<sup>-1</sup>) 3337, 1846, 1762.

### 3s: D-Penicillamine NCA

Air humidity: 68%

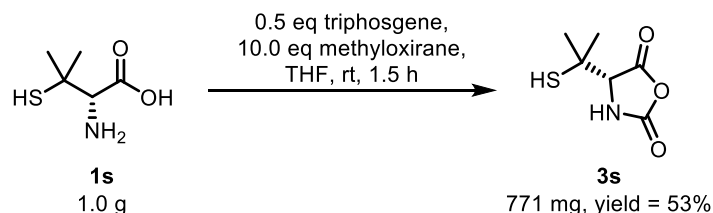

To a pressure vessel with heavy wall, D-penicillamine **1s** (1.0 g, 6.7 mmol, 1.0 eq), THF (20 mL), methyloxirane (5.8 mL, 82.5 mmol, 10.0 eq) were added sequentially under magnetic stirring. Triphosgene (1.2 g, 4.1 mmol, 0.5 eq) was finally added in one portion and the vessel was sealed immediately. The reaction was stirred at room temperature for 1.5 h. After the removal of solvent

by rotatory evaporation *in vacuum under 45 °C*, the crude product was purified by crystallization in PE/THF **below 10 °C (preferably in a cold room)** without N<sub>2</sub> protection. The pure product **3s** was obtained as a white crystal (771 mg, yield = 53%). The NCA was stored at -10 °C for 2 months.

<sup>1</sup>H NMR (400 MHz, CD<sub>2</sub>Cl<sub>2</sub>) δ 6.49 (br, 1H), 4.28 (d, *J* = 1.1 Hz, 1H), 2.10 (s, 1H), 1.55 (s, 3H), 1.49 (s, 3H).

<sup>13</sup>C NMR (101 MHz, CD<sub>2</sub>Cl<sub>2</sub>) δ 166.8, 152.2, 68.4, 46.1, 29.9, 26.3.

HRMS (ESI-FTICR, *m/z*): [M + H]<sup>+</sup> calculated for C<sub>6</sub>H<sub>10</sub>NO<sub>3</sub>S<sup>+</sup>: 176.0376; found: 176.0378

FT-IR (cm<sup>-1</sup>) 3188, 1857, 1787.

#### Preparation of poly-L-glutamic acid:

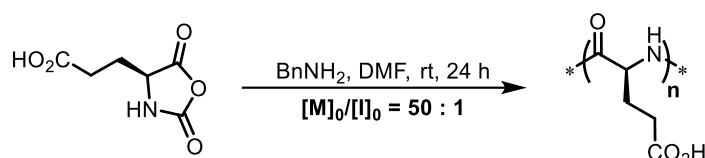

To the solution of L-glutamic acid NCA (250 mg, 1.4 mmol, 50 eq) in anhydrous DMF (500 μL), the initiator benzyl amine (29 μL × 1.0 M, 1.0 eq) was added. The reaction was stirred at room temperature for 16 h. After extensive dialysis and lyophilization, the polymer was obtained as a white powder. The experiments were independently repeated twice. The obtained *M<sub>n</sub>* was measured as 8.2 ± 0.2 kg/mol, and *D* was in the range of 1.04-1.06 by aqueous SEC.

#### 4a: Sarcosine NCA

Air humidity: 44%

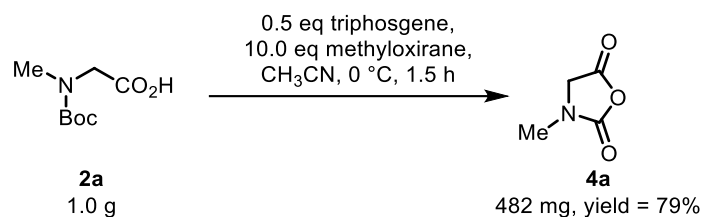

To a 100 mL flask, Boc-sarcosine **2a** (1.0 g, 5.3 mmol, 1.0 eq), CH<sub>3</sub>CN (20 mL), methyloxirane (3.7 mL, 53 mmol, 10.0 eq) were added sequentially under magnetic stirring in an ice bath. Triphosgene (785 mg, 2.7 mmol, 0.5 eq) was finally added in one portion and the flask was kept half-open to facilitate the *in situ* deprotection of Boc. The reaction was stirred at ~ 4 °C in an ice bath for 1.5 h. **For safety reason, the excessive triphosgene** was quenched by adding 10 mL **cold water** at ~ 4 °C with 1-3 min stirring. The mixture was extracted with ethyl acetate (EA, 20 mL × 2) at room temperature. The combined organic phase was washed with brine and dried with anhydrous Na<sub>2</sub>SO<sub>4</sub>. After the removal of solvent by rotatory evaporation *in vacuum under 45 °C*, the crude product was purified by crystallization in hexane/THF **below 10 °C (preferably in a cold room)** without N<sub>2</sub> protection. The pure product **4a** was obtained as a white granular crystal (482 mg, yield = 79%). The NCA was stored at -20 °C for 1 month.

<sup>1</sup>H NMR (400 MHz, CDCl<sub>3</sub>) δ 4.13 (s, 2H), 3.03 (s, 3H).

$^{13}\text{C}$  NMR (101 MHz,  $\text{CDCl}_3$ )  $\delta$  165.5, 152.4, 51.0, 30.4.

FT-IR ( $\text{cm}^{-1}$ ) 1849, 1765.

### 7b: L-Mandelic acid OCA

Air humidity: 65%

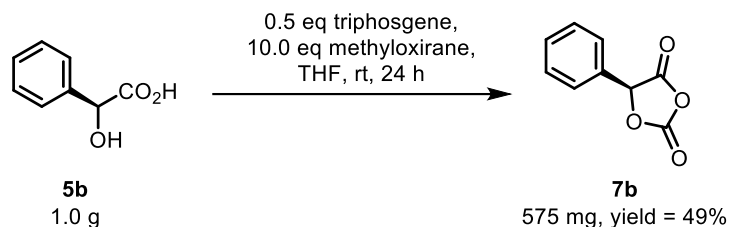

To a pressure vessel with heavy wall, L-mandelic acid **5b** (1.0 g, 6.6 mmol, 1.0 eq), THF (20 mL), methyloxirane (4.6 mL, 66 mmol, 10.0 eq) were added sequentially under magnetic stirring. Triphosgene (976 mg, 3.3 mmol, 0.5 eq) was finally added in one portion and the vessel was sealed immediately. The reaction was stirred at room temperature for 24 h in total. After the removal of solvent by rotatory evaporation *in vacuum under 45 °C*, the crude product was purified by crystallization in hexane/THF **below 10 °C (preferably in a cold room)** without  $\text{N}_2$  protection. The pure product **7b** was obtained as a white needle crystal (575 mg, yield = 49%). The NCA was stored at -10 °C for 2 month.

$^1\text{H}$  NMR (400 MHz,  $\text{DMSO-}d_6$ )  $\delta$  7.47 – 7.40 (m, 2H), 7.39 – 7.24 (m, 3H), 5.04 (s, 1H).

$^{13}\text{C}$  NMR (101 MHz,  $\text{DMSO-}d_6$ )  $\delta$  174.2, 140.3, 128.2, 127.8, 126.7, 72.5.

HRMS (EI,  $m/z$ ):  $[\text{M}]^+$  calculated for  $\text{C}_9\text{H}_6\text{O}_4^+$ : 178.02606; found: 178.02615.

FT-IR ( $\text{cm}^{-1}$ ) 3447, 1727.

### 8a: $\beta$ -alanine NCA

Air humidity: 45%

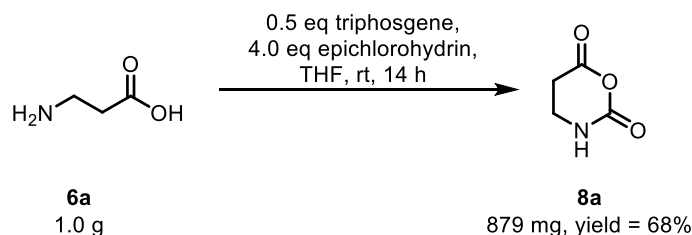

To a pressure vessel with heavy wall,  $\beta$ -alanine **6a** (1.0 g, 11.3 mmol, 1.0 eq), THF (40 mL), epichlorohydrin (3.5 mL, 45.1 mmol, 4.0 eq) were added sequentially under magnetic stirring. Triphosgene (1.7 g, 5.7 mmol, 0.5 eq) was finally added in one portion and the vessel was sealed immediately. The reaction was stirred at room temperature for 14 h and filtered directly. After the removal of solvent by rotatory evaporation *in vacuum under 40 °C*, the crude product was purified by crystallization in PE/THF **below 10 °C (preferably in a cold room)** without  $\text{N}_2$  protection. The pure product **8a** was obtained as a white crystal (879 mg, yield = 68%). The NCA was stored at -20 °C for 1 month.

$^1\text{H}$  NMR (400 MHz,  $\text{DMSO-}d_6$ )  $\delta$  8.38 (br, 1H), 3.26 (td,  $J$  = 6.7, 2.8 Hz, 2H), 2.75 (t,  $J$  = 6.7 Hz, 2H).



$^{13}\text{C}$  NMR (101 MHz, DMSO- $d_6$ )  $\delta$  167.0, 149.6, 34.3, 28.3.

FT-IR ( $\text{cm}^{-1}$ ) 1801, 1763.

### 8b: $\beta$ -aminobutyric acid NCA

Air humidity: 45%

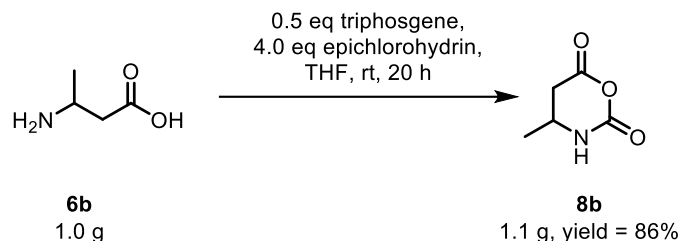

To a pressure vessel with heavy wall,  $\beta$ -aminobutyric acid **6b** (1.0 g, 9.8 mmol, 1.0 eq), THF (30 mL), epichlorohydrin (3.0 mL, 39.2 mmol, 4.0 eq) were added sequentially under magnetic stirring. Triphosgene (1.4 g, 4.9 mmol, 0.5 eq) was finally added in one portion and the vessel was sealed immediately. The reaction was stirred at room temperature for 20 h and filtered directly. After the removal of solvent by rotatory evaporation *in vacuum under 45 °C*, the crude product was purified by crystallization in PE/THF **below 10 °C (preferably in a cold room)** without  $\text{N}_2$  protection. The pure product **8b** was obtained as a white crystal (1.1 g, yield = 86%). The NCA was stored at -20 °C for 1 month.

$^1\text{H}$  NMR (400 MHz, DMSO- $d_6$ )  $\delta$  8.46 (s, 1H), 3.71 – 3.59 (m, 1H), 2.81 (dd,  $J = 15.9, 4.0$  Hz, 1H), 2.58 (dd,  $J = 15.9, 9.2$  Hz, 1H), 1.11 (d,  $J = 6.5$  Hz, 3H).

$^{13}\text{C}$  NMR (101 MHz, DMSO- $d_6$ )  $\delta$  166.7, 149.1, 41.9, 35.5, 20.2.

HRMS (EI,  $m/z$ ):  $[\text{M}+\text{H}]^+$  calculated for  $\text{C}_5\text{H}_8\text{NO}_3^+$ : 130.0499; found: 130.0499.

FT-IR ( $\text{cm}^{-1}$ ) 1804, 1760.

### 8d: L-aspartic acid $\beta$ -benzyl ester NCA

Air humidity: 60%

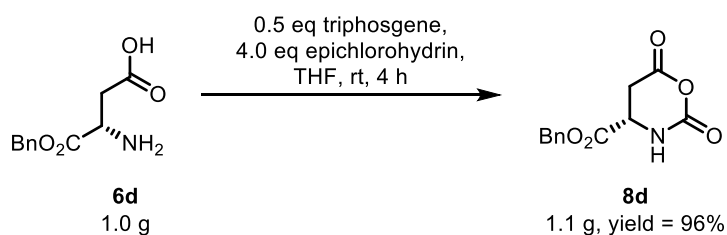

To a pressure vessel with heavy wall, L-aspartic acid  $\beta$ -methyl ester **6d** (1.0 g, 4.6 mmol, 1.0 eq), THF (30 mL), epichlorohydrin (1.4 mL, 17.9 mmol, 4.0 eq) were added sequentially under magnetic stirring. Triphosgene (675 mg, 2.3 mmol, 0.5 eq) was finally added in one portion and the vessel was sealed immediately. The reaction was stirred at room temperature for 4 h. After the removal of solvent by rotatory evaporation *in vacuum under 45 °C*, the crude product was purified by crystallization in PE/THF **below 10 °C (preferably in a cold room)** without  $\text{N}_2$  protection. The pure product **8d** was obtained as a white crystal (1.1 g, yield = 96%). The NCA was stored at -20 °C for 2 months.

**<sup>1</sup>H NMR** (400 MHz, DMSO-*d*<sub>6</sub>) δ 9.06 – 8.99 (br, 1H), 7.38 (s, 6H), 5.19 (s, 2H), 4.52 – 4.20 (m, 1H), 3.26 (dd, *J* = 16.8, 7.1 Hz, 1H), 2.94 (d, *J* = 16.8 Hz, 1H).

**<sup>13</sup>C NMR** (101 MHz, DMSO-*d*<sub>6</sub>) δ 170.3, 165.1, 148.8, 135.3, 128.6, 128.4, 128.1, 67.1, 48.3, 30.6.

**HRMS** (EI, *m/z*): [M+H]<sup>+</sup> calculated for C<sub>12</sub>H<sub>12</sub>NO<sub>5</sub><sup>+</sup>: 250.0710; found: 250.0708.

**FT-IR** (cm<sup>-1</sup>) 1808, 1764.

### 8e: 3-amino-3-(*p*-tolyl)propanoic acid NCA

Air humidity: 70%

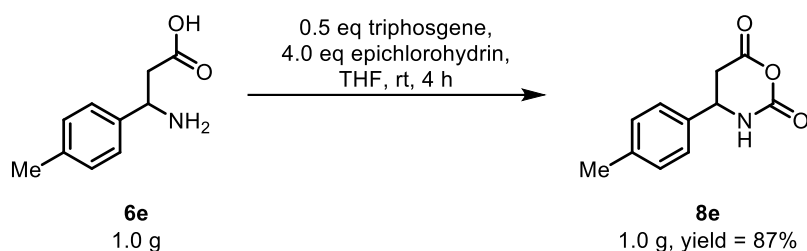

To a pressure vessel with heavy wall, 3-amino-3-(*p*-tolyl)propanoic acid **6e** (1.0 g, 5.7 mmol, 1.0 eq), THF (30 mL), epichlorohydrin (1.8 mL, 22.3 mmol, 4.0 eq) were added sequentially under magnetic stirring. Triphosgene (827 mg, 2.8 mmol, 0.5 eq) was finally added in one portion and the vessel was sealed immediately. The reaction was stirred at room temperature for 4 h and filtered directly. After the removal of solvent by rotatory evaporation *in vacuum under 45 °C*, the crude product was purified by crystallization in PE/THF **below 10 °C (preferably in a cold room)** without N<sub>2</sub> protection. The pure product **8e** was obtained as a white crystal (1.0 g, yield = 87%). The NCA was stored at -20 °C for 2 months.

**<sup>1</sup>H NMR** (400 MHz, DMSO-*d*<sub>6</sub>) δ 8.90 (d, *J* = 3.0 Hz, 1H), 7.21 (s, 4H), 4.76 (td, *J* = 6.2, 3.0 Hz, 1H), 3.13 (dd, *J* = 16.1, 6.2 Hz, 1H), 2.94 (dd, *J* = 16.1, 6.2 Hz, 1H), 2.29 (s, 3H).

**<sup>13</sup>C NMR** (101 MHz, DMSO-*d*<sub>6</sub>) δ 166.1, 149.3, 137.5, 136.7, 129.4, 126.0, 49.0, 36.3, 20.7.

**HRMS** (ESI-FTICR, *m/z*): [M + Na]<sup>+</sup> calculated for C<sub>11</sub>H<sub>11</sub>NNaO<sub>3</sub><sup>+</sup>: 228.0631; found: 228.0629.

**FT-IR** (cm<sup>-1</sup>) 1797, 1735.

### 8f: 3-amino-3-(4-chlorophenyl)propanoic acid NCA

Air humidity: 90%

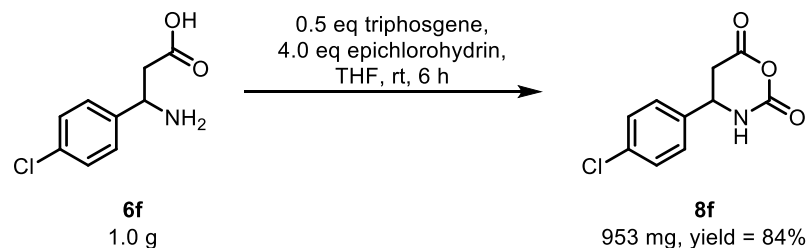

To a pressure vessel with heavy wall, 3-amino-3-(4-chlorophenyl)propanoic acid **6f** (1.0 g, 5.0 mmol, 1.0 eq), THF (30 mL), epichlorohydrin (1.6 mL, 20.4 mmol, 4.0 eq) were added sequentially under magnetic stirring. Triphosgene (756 mg, 2.6 mmol, 0.5 eq) was finally added in one portion and the vessel was sealed immediately. The reaction was stirred at room temperature for 6 h and filtered directly. After the removal of solvent by rotatory evaporation *in vacuum under 45 °C*, the crude

product was purified by crystallization in PE/THF **below 10 °C (preferably in a cold room)** without N<sub>2</sub> protection. The pure product **8f** was obtained as a white crystal (953 mg, yield = 84%). The NCA was stored at -20 °C for 2 months.

**<sup>1</sup>H NMR** (400 MHz, DMSO-*d*<sub>6</sub>) δ 8.95 (d, *J* = 2.8 Hz, 1H), 7.48 (d, *J* = 8.1 Hz, 2H), 7.37 (d, *J* = 8.1 Hz, 2H), 4.86 – 4.80 (m, 1H), 3.15 (dd, *J* = 16.1, 5.5 Hz, 1H), 2.98 (dd, *J* = 16.1, 7.2 Hz, 1H).

**<sup>13</sup>C NMR** (101 MHz, DMSO-*d*<sub>6</sub>) δ 165.8, 149.2, 138.6, 132.8, 128.8, 128.2, 48.8, 36.0.

**HRMS** (ESI-FTICR, *m/z*): [M + NH<sub>4</sub>]<sup>+</sup> calculated for C<sub>10</sub>H<sub>12</sub>ClN<sub>2</sub>O<sub>3</sub><sup>+</sup>: 243.0531; found: 243.0530.

**FT-IR** (cm<sup>-1</sup>) 1807, 1760.

### Preparation of P(EG<sub>3</sub>-Glu)-*branch*-PCys:

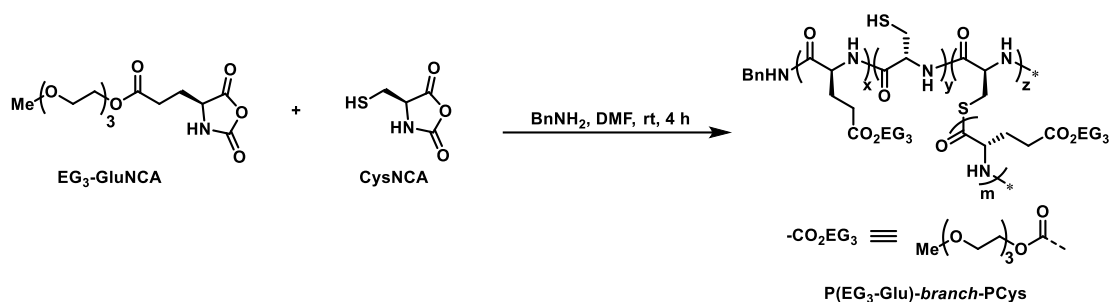

To the solution of EG<sub>3</sub>-GluNCA (1.0 g, 3.1 mmol, 5 eq) and CysNCA (75 mg, 0.6 mmol, 1 eq) in ultradry DMF (1.0 mL) under room temperature, the initiator benzyl amine (25 μL × 0.5 M, 0.02 eq) was added. The reaction was stirred at room temperature for 4 h. The polymer was precipitated in diethyl ether and centrifuged, which was further purified by extensive dialysis. After lyophilization, the polymer was obtained as a white powder (780 mg, yield = 86%).

### Calibration of thiol determination with cysteine

Into 1 ml of sodium phosphate buffer (0.1 M, pH 8.0), 4.0 mg DTNB was dissolved. Then, into 50 ml of buffer, 11.8 mg (75 μmol) of cysteine hydrochloride were added and stirred for several minutes until all cysteine was dissolved. Subsequently, a set of cysteine standards by diluting cysteine hydrochloride solution at 1.5 mM, 1.25 mM, 1.0 mM, 0.75 mM, 0.5 mM, 0.25 mM were prepared. The mixture of 2 μL DTNB and 10 μL standards was diluted with 100 μL buffer and incubated at room temperature for 15 minutes. The absorbance at 412 nm was measured to generate a standard curve.

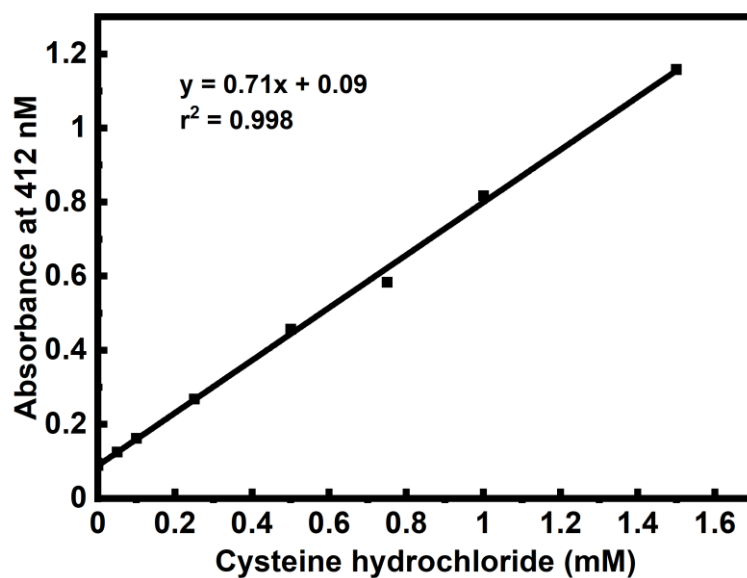

#### Measurement of polymer solution

Into 2 mL sodium phosphate buffer (0.1 M, pH 8.0), 2.1 mg P(EG<sub>3</sub>-Glu)-*branch*-PCys was dissolved. The mixture of 2  $\mu$ L DTNB and 10  $\mu$ L polymer solution was diluted with 100  $\mu$ L buffer and incubated at room temperature for 15 minutes. The absorbance at 412 nm was measured. The 0.24 mM concentration of free thiol of polymer was determined by standard curve.

## Supplementary Figures and Tables

### Kinetic study of Bn-GluNCA with D<sub>2</sub>O in THF-*d*<sub>8</sub>:

Bn-GluNCA (267 mg, 1.0 mmol, 1.0 eq) was dissolved in 0.5 mL THF-*d*<sub>8</sub>, to which was added D<sub>2</sub>O (20 μL, 1.1 mmol, 1.1 eq). The mixture was analyzed at different time points by <sup>1</sup>H NMR to calculate the NCA conversion.

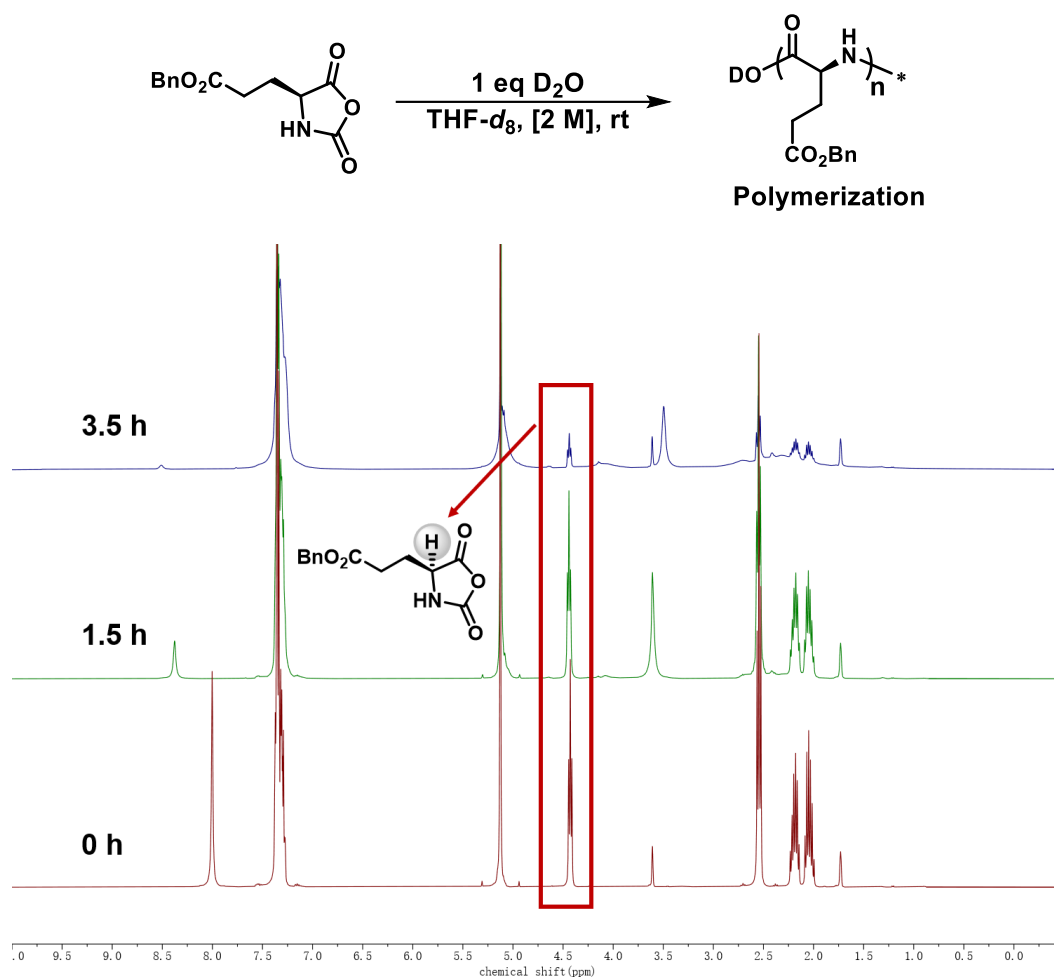

| entry | time (h) | conversion (%) |
|-------|----------|----------------|
| 1     | 0        | 0              |
| 2     | 1.5      | 13             |
| 3     | 3.5      | 80             |

Supplementary Figure 1 Overlay of <sup>1</sup>H NMR spectra of Bn-GluNCA with D<sub>2</sub>O at different time points, the conversion calculation was based on the integrate of α-H of NCA using the solvent peak as the internal standard.

### Kinetic study of Bn-GluNCA with D<sub>2</sub>O and DCl in THF-*d*<sub>8</sub>:

1. In situ generation of DCl and D<sub>2</sub>O mixture in THF-*d*<sub>8</sub>: To a 25 mL flask, triphosgene (395 mg, 1.3 mmol, 0.33 eq) and 2.0 mL THF-*d*<sub>8</sub> were added sequentially under magnetic stirring at 0 °C. To the mixture was added D<sub>2</sub>O (160 μL, 8.0 mmol, 2.0 eq) and CO<sub>2</sub> gas was generated immediately. After stirring at 0 °C for 20 min, the DCl solution in THF-*d*<sub>8</sub> was used directly.
2. Kinetic study: To the above mixture of DCl and D<sub>2</sub>O in THF-*d*<sub>8</sub>, Bn-GluNCA (1.05 g, 4.0 mmol, 1 eq) was added at room temperature. An aliquot (400 μL) of the reaction solution was taken out at different time and analyzed immediately by <sup>1</sup>H NMR to calculate the NCA conversion. Note the peaks became broader over time because a large amount of amino acid precipitated in the NMR tube, which makes the shimming unsatisfactory. The precipitation was separated and confirmed by <sup>1</sup>H NMR as amino acid.

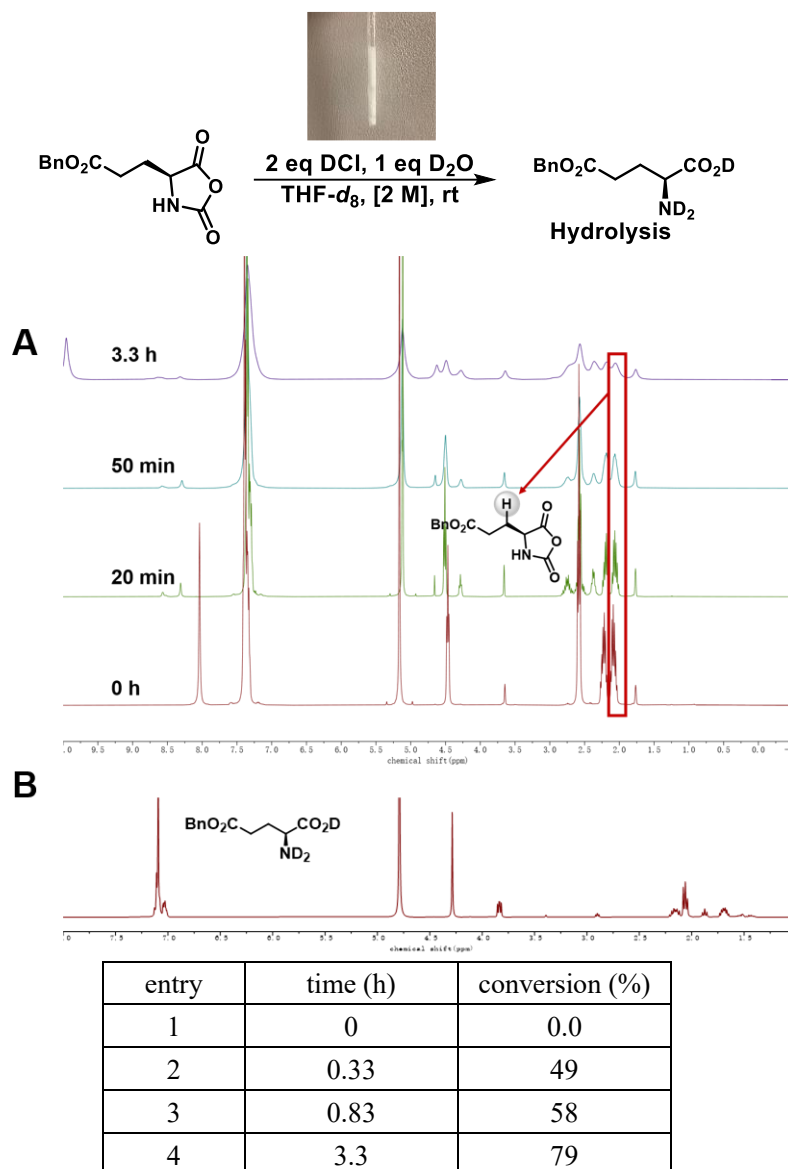

Supplementary Figure 2 (A) Overlay of <sup>1</sup>H NMR spectra of Bn-GluNCA with D<sub>2</sub>O and DCl at different time, the conversion calculation was based on the integrate of β-H of NCA using the solvent peak as the internal standard. (B) <sup>1</sup>H NMR spectra of hydrolyzed Bn-GluNCA.

### Kinetic study of $\alpha$ -pinene with HCl in THF- $d_8$ :

To a NMR tube,  $\alpha$ -pinene (79  $\mu$ L, 0.5 mmol, 1.0 eq) and 0.5 mL THF- $d_8$  were mixed and record as 0 h. Then, 12 N concentrated HCl (aq, 42  $\mu$ L, 0.5 mmol, 1.0 eq) was added to the NMR tube. The mixture was analyzed at different time points by  $^1\text{H}$  NMR to calculate the  $\alpha$ -pinene conversion.

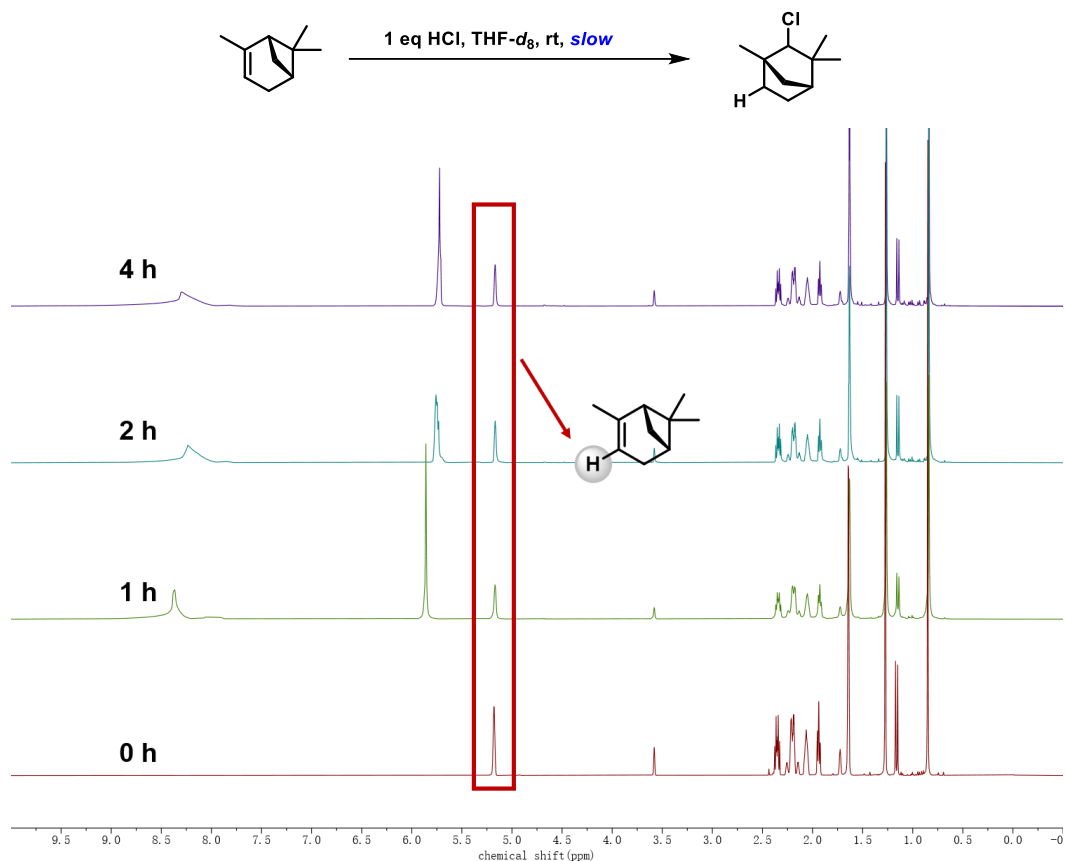

| entry | time (h) | conversion (%) |
|-------|----------|----------------|
| 1     | 0        | 0              |
| 2     | 1        | 18             |
| 3     | 2        | 20             |
| 4     | 4        | 21             |

**Supplementary Figure 3 Overlay of  $^1\text{H}$  NMR spectra of  $\alpha$ -pinene with HCl at different time points, the conversion calculation was based on the integrate of alkenyl H using the solvent peak as the internal standard.**

### Kinetic study of PO with HCl in THF-*d*<sub>8</sub>:

To a NMR tube, PO (35  $\mu$ L, 0.5 mmol, 1 eq) and 0.5 mL THF-*d*<sub>8</sub> were mixed and recorded by NMR as 0 h. Then, 12 N concentrated HCl (aq, 42  $\mu$ L, 0.5 mmol, 1 eq) was added and heat was instantly released. The mixture was analyzed immediately by <sup>1</sup>H NMR to calculate the PO conversion.

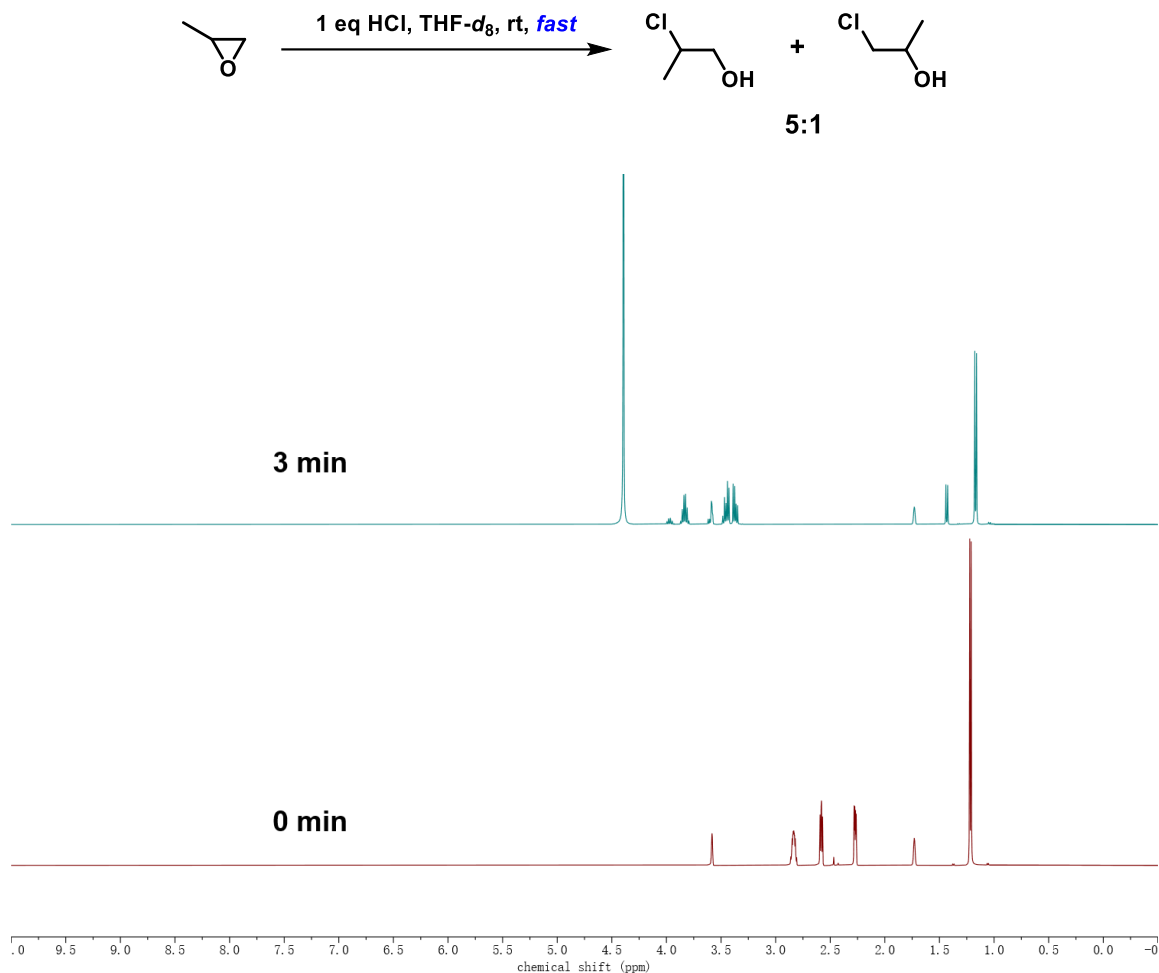

| entry | time (min) | conversion (%) |
|-------|------------|----------------|
| 1     | 0          | 0              |
| 2     | 3          | 100            |

Supplementary Figure 4 Overlay of <sup>1</sup>H NMR spectra of PO with HCl at different time points.



## DFT Study (Supplementary Figure 5-6)

All DFT calculations were performed in Gaussian 09 E program.<sup>[2]</sup> Becke3LYP functional<sup>[3]</sup> was used to locate all the stationary points and execute frequency analysis in the THF solution phase with SMD solvation model.<sup>[4]</sup> The Pople 6-31G(d)<sup>[5]</sup> basis set was applied for all elements. The intrinsic reaction coordinate (IRC) calculations were also performed to confirm whether the stationary points were transition states or intermediates. Single point energies were calculated using M06-2X<sup>[6]</sup> functional and the def2-TZVPP basis set<sup>[7]</sup> in THF using the SMD solvation model.

We elucidated the mechanism of phosgenation of amino acid using L-alanine as the model molecule. Two pathways were initially considered: the acid acylation (red) and the amine acylation (green). The DFT calculations revealed that the amino acylation process was favored over acid acylation process by 5.5 kcal/mol due to the stronger nucleophilicity of amine. This result indicated that the amine acylation pathway was the favorable one. Thus, the amine acylation process was conducted to investigate the epoxide effect in the ring-closing step.

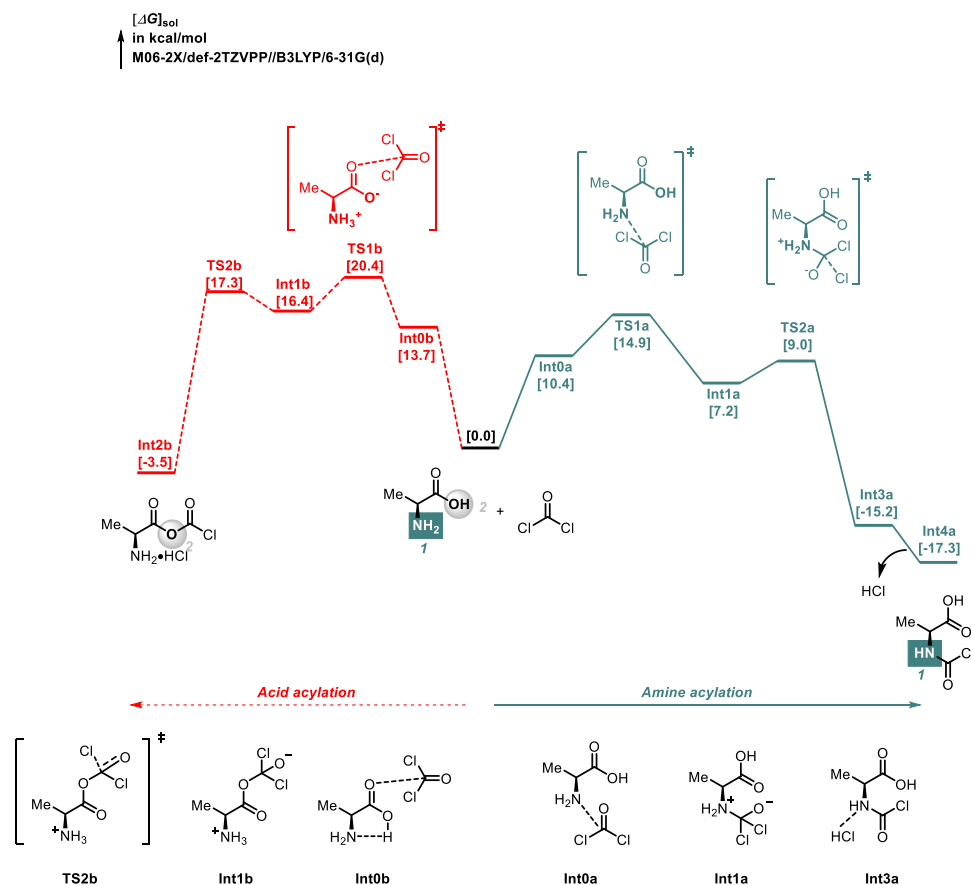

Supplementary Figure 5 DFT study of the acylation step.

Next, we investigated the effect of epoxide. The DFT calculations revealed that the rate-determining step of the whole reaction was the ring closing step from **Int4a** to **Int5c** with the activation Gibbs free energy to be 26.1 kcal/mol. The non-epoxide pathway from **Int4a** to **Int5a** was disfavored over 2.9 kcal/mol. Moreover, the IRC showed that the Cl anion could directly shift to the neighboring carbonyl group to form the **Int5c**.

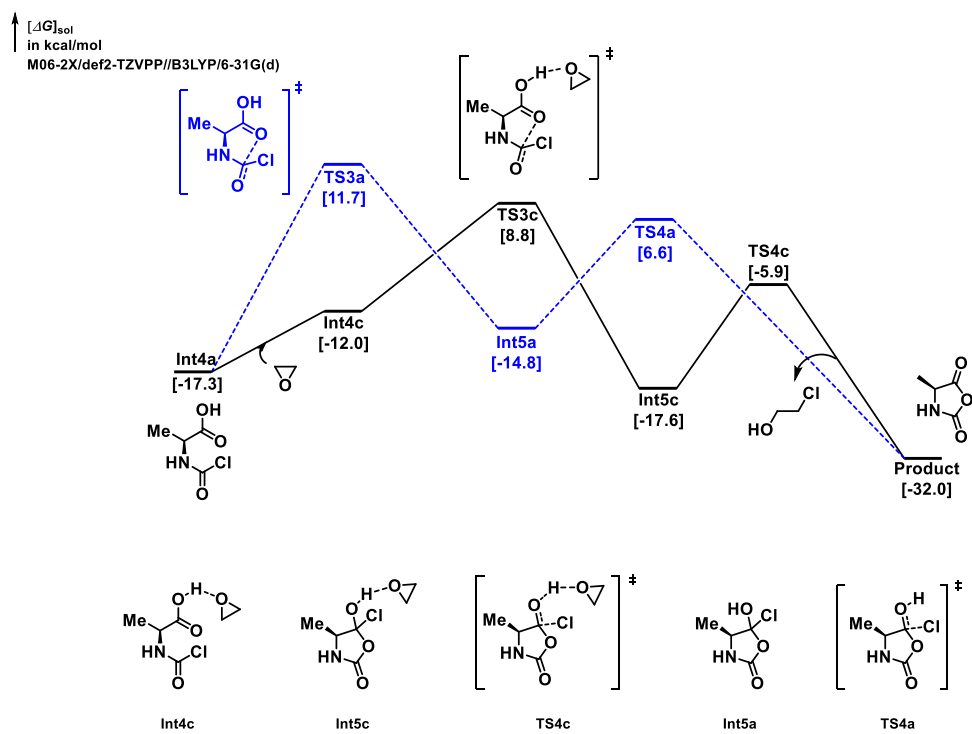

Supplementary Figure 6 DFT calculations of the effect of epoxide with model reaction.

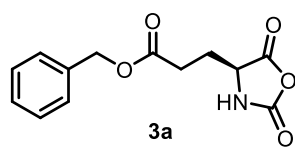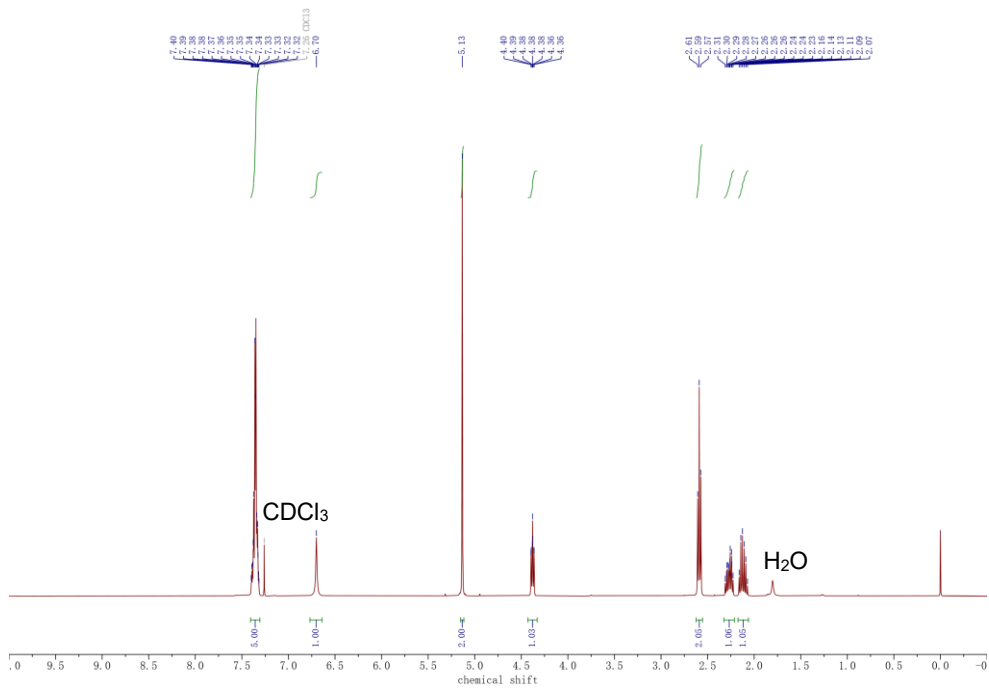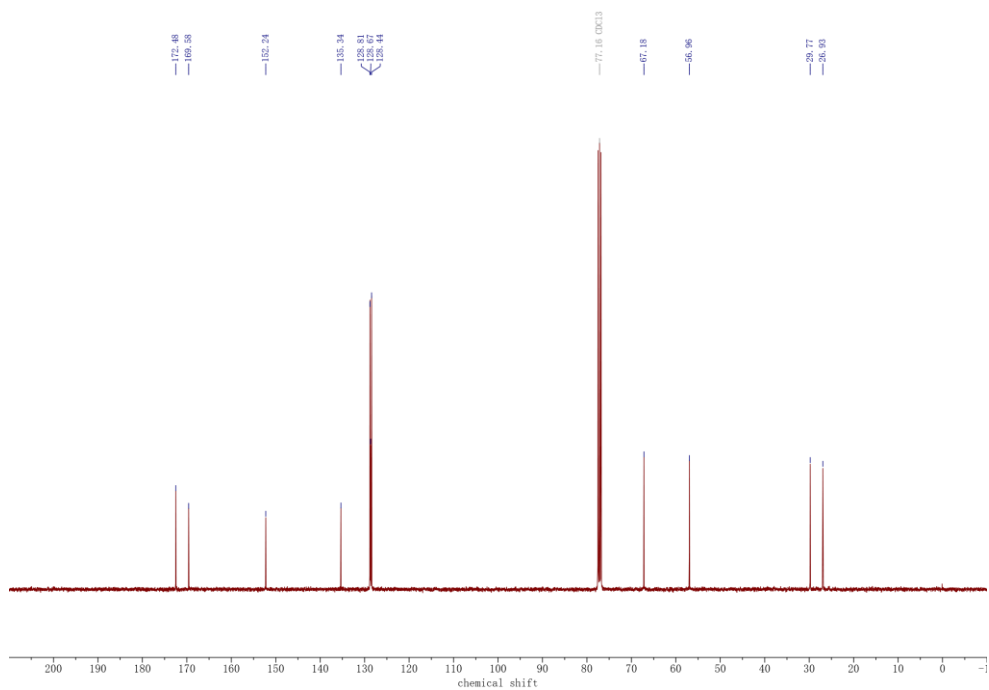

Supplementary Figure 7 <sup>1</sup>H and <sup>13</sup>C NMR spectra of **3a** in CDCl<sub>3</sub>.

**Tests of PO Loading on NCA yield**

|                          | NCA yield |          |
|--------------------------|-----------|----------|
|                          | 4 eq PO   | 10 eq PO |
| Sarcosine NCA            | 79%       | 63%      |
| L-Phenyl lactic acid OCA | 62%       | 65%      |
| L-Mandelic acid OCA      | 36%       | 49%      |
| L-Tryptophan NCA         | 90%       | 89%      |

**Supplementary Table 1**

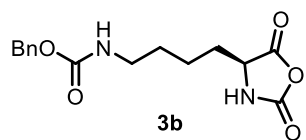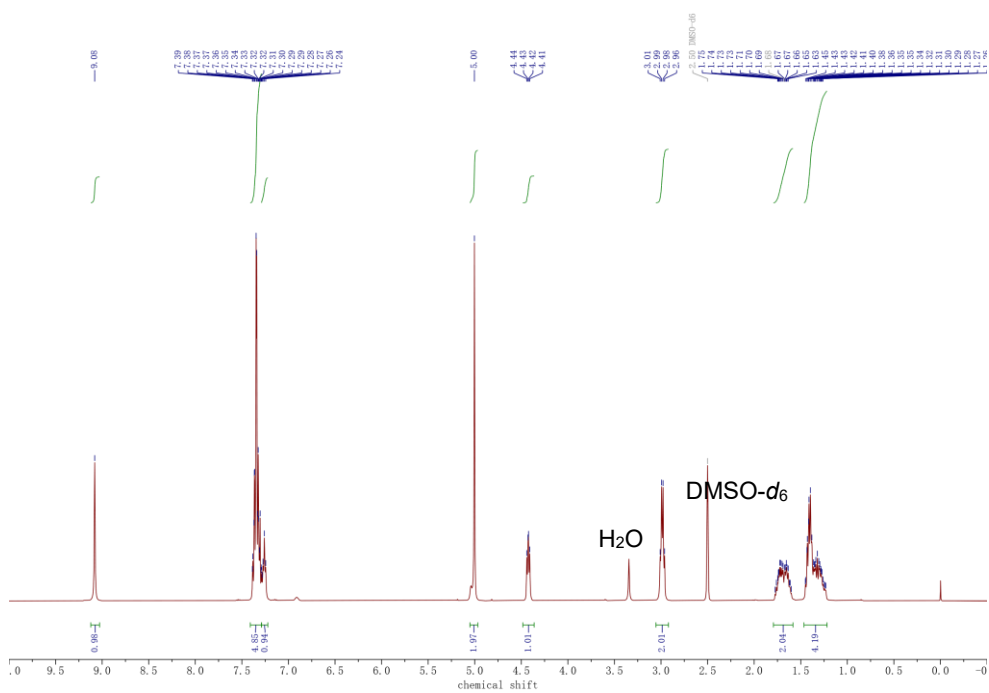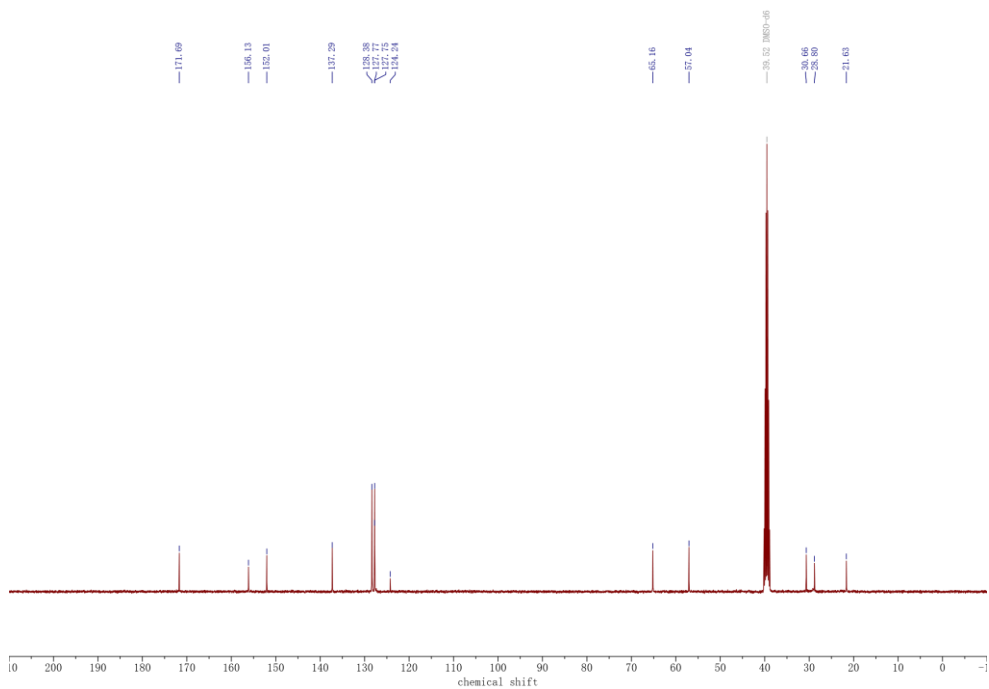

Supplementary Figure 8 <sup>1</sup>H and <sup>13</sup>C NMR spectra of 3b in DMSO-*d*<sub>6</sub>

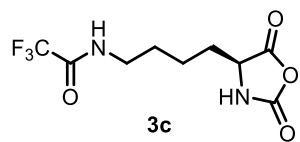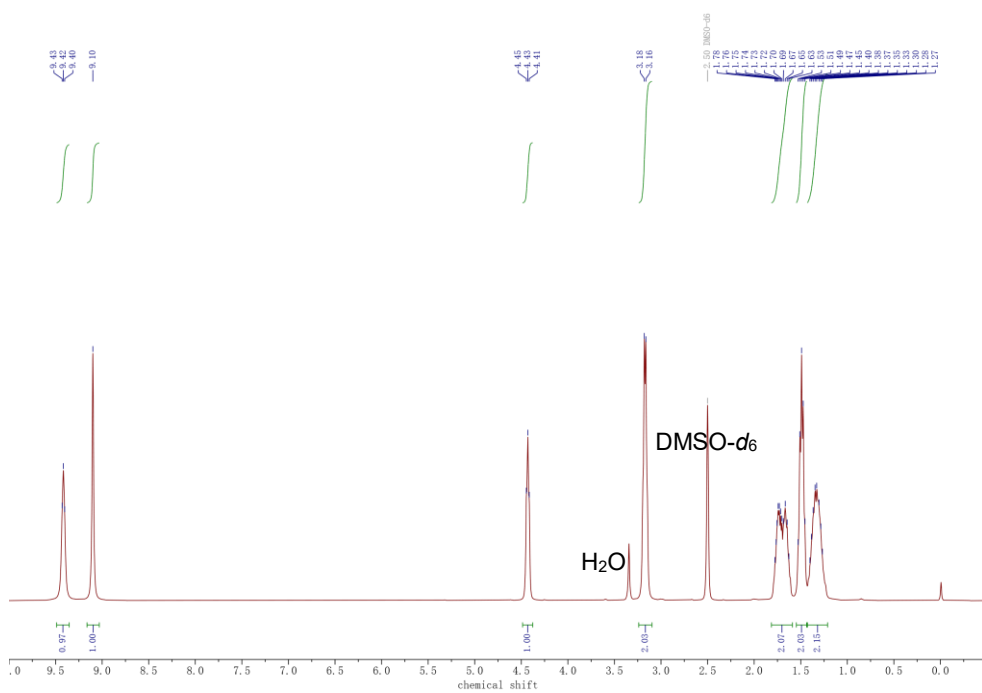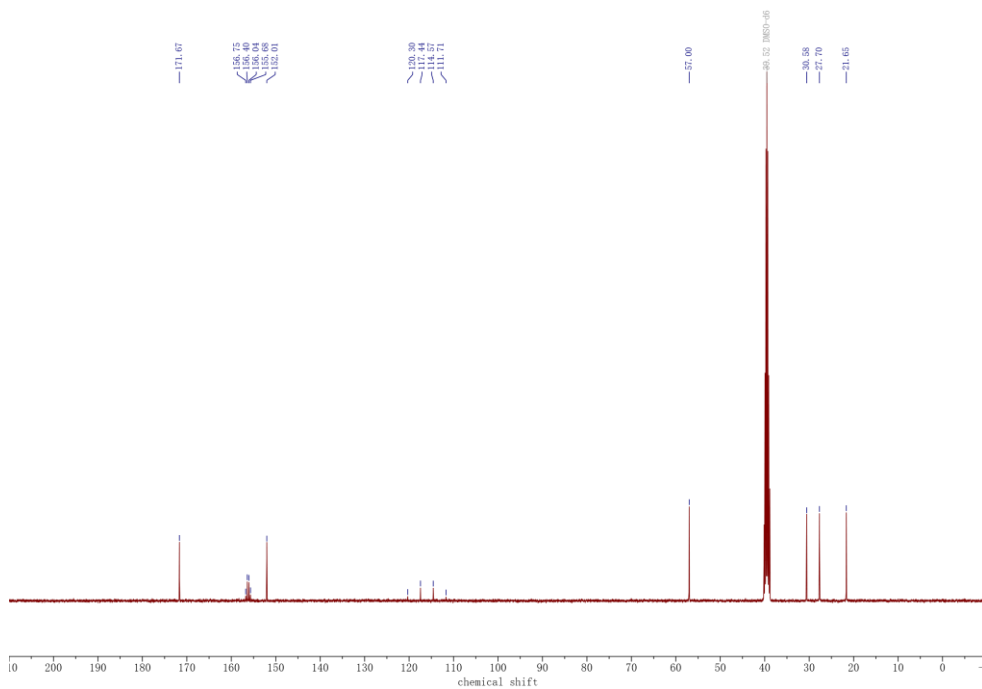

Supplementary Figure 9 <sup>1</sup>H and <sup>13</sup>C NMR spectra of **3c** in DMSO-*d*<sub>6</sub>.

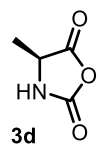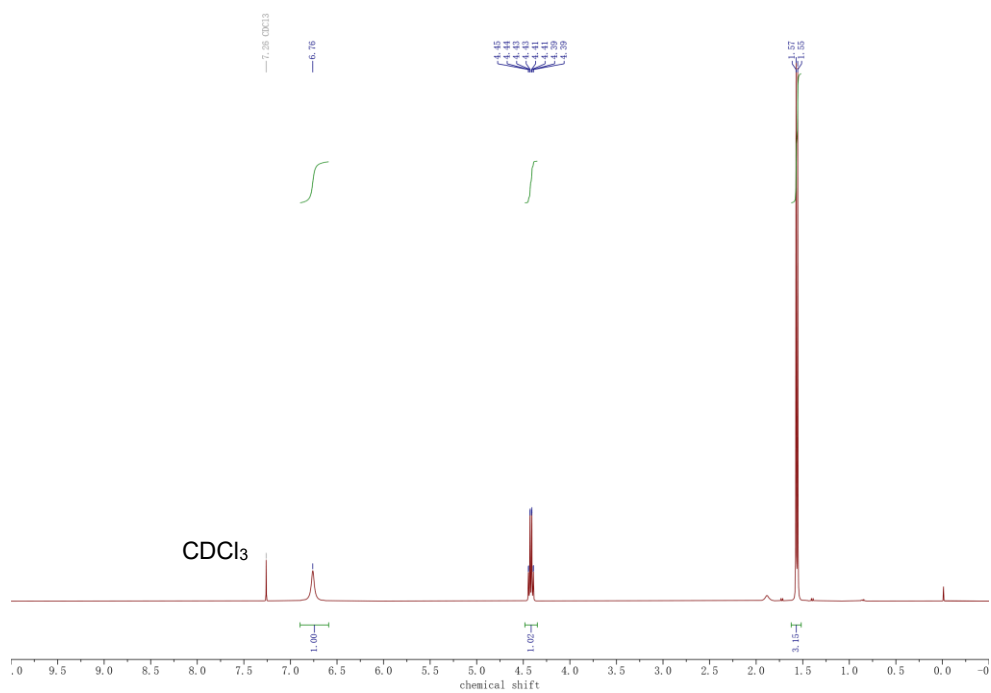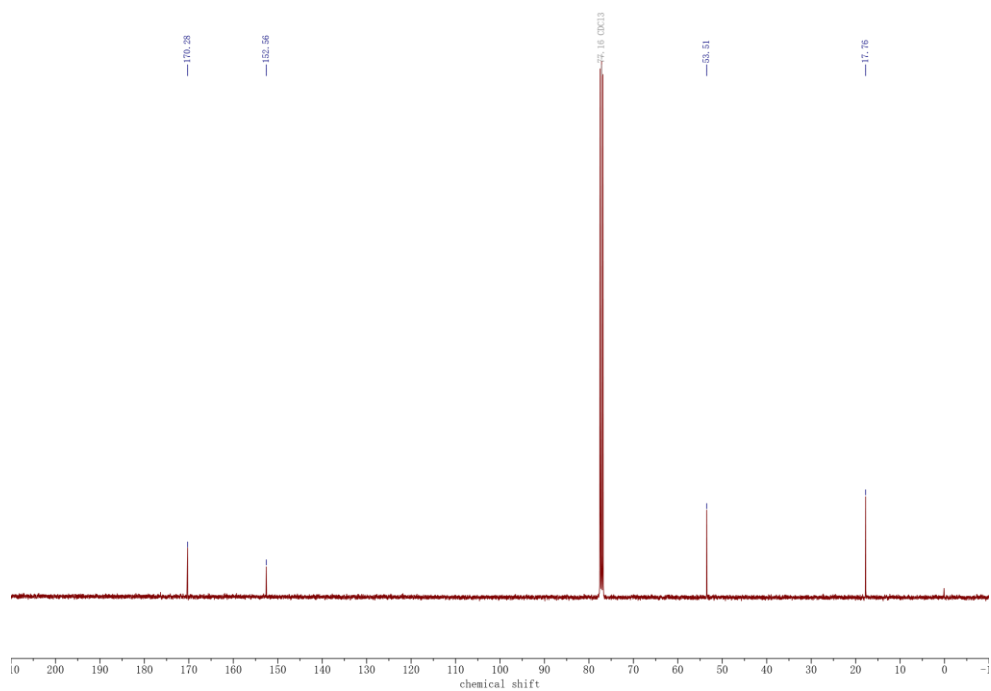

Supplementary Figure 10  $^1\text{H}$  and  $^{13}\text{C}$  NMR spectra of **3d** in  $\text{CDCl}_3$ .

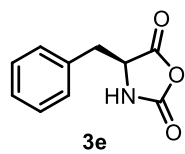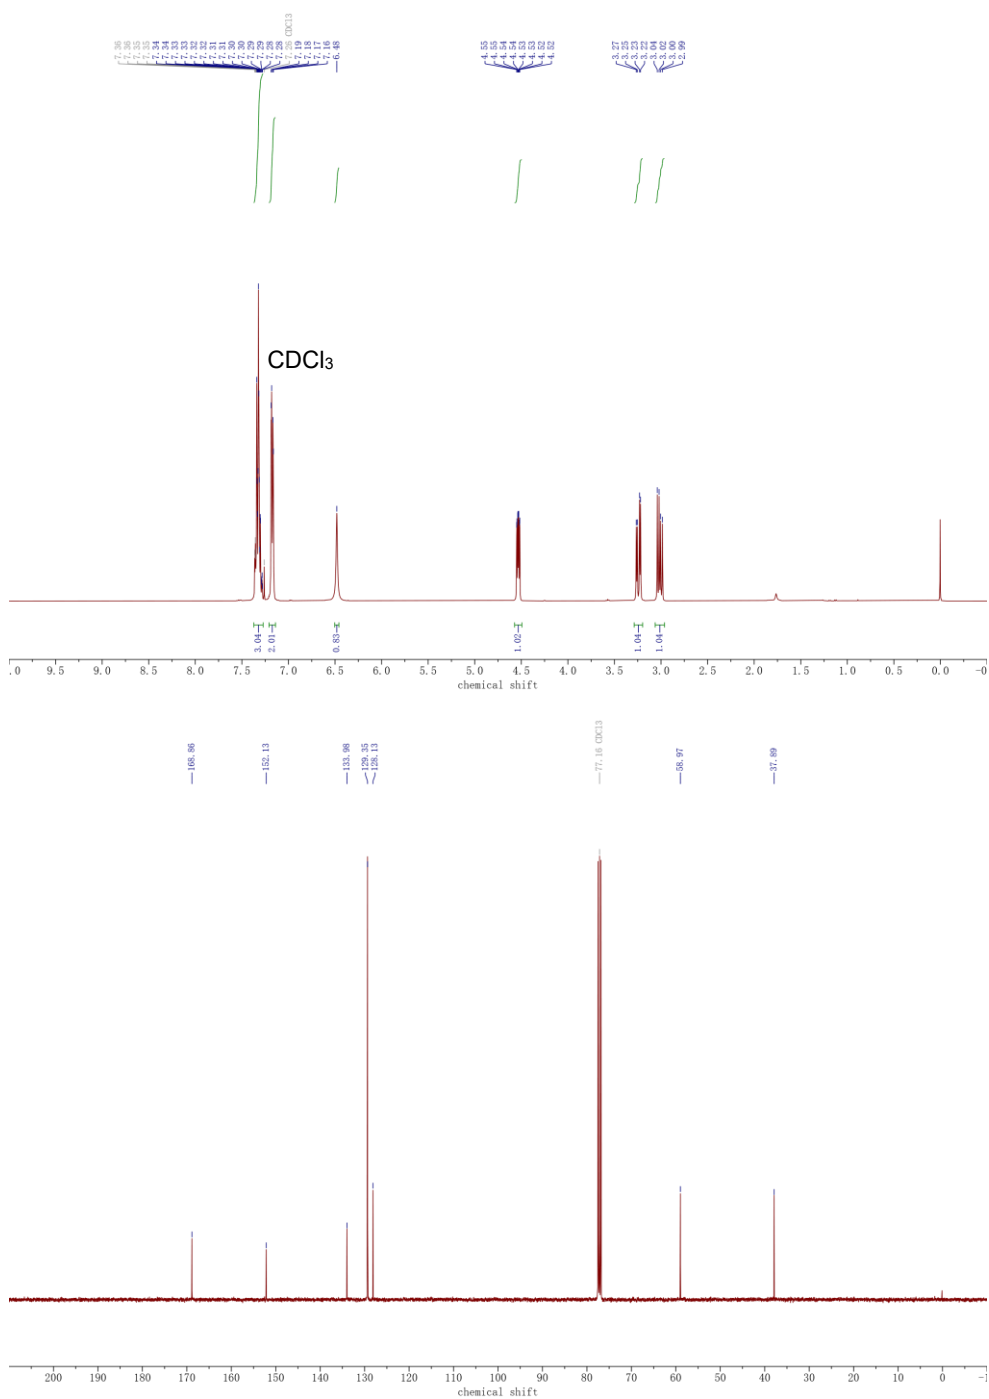

**Supplementary Figure 11 <sup>1</sup>H and <sup>13</sup>C NMR spectra of 3e in CDCl<sub>3</sub>.**



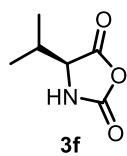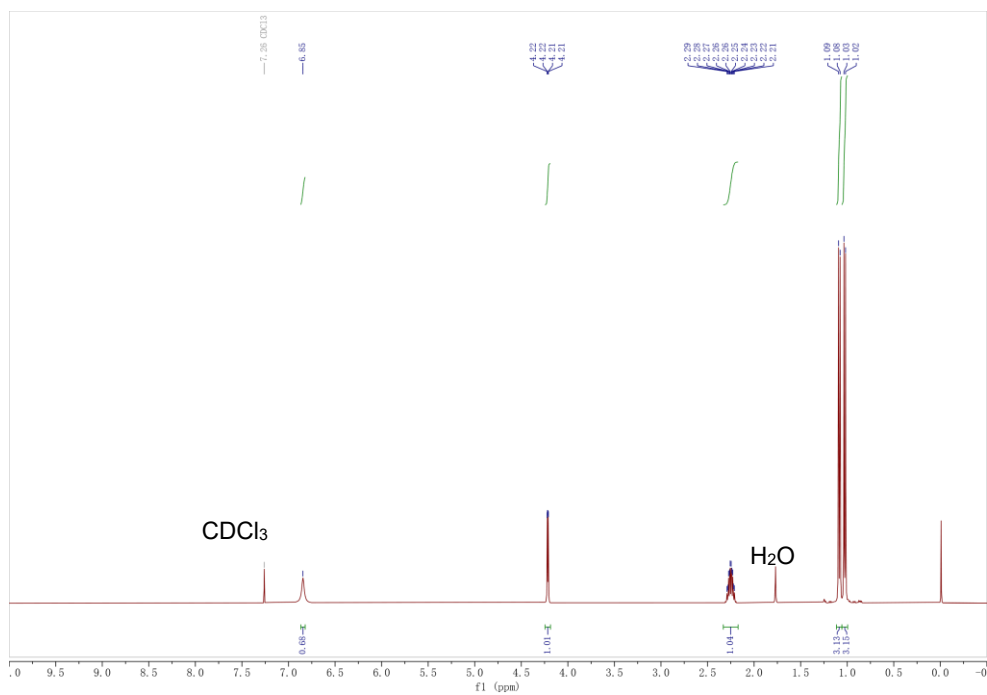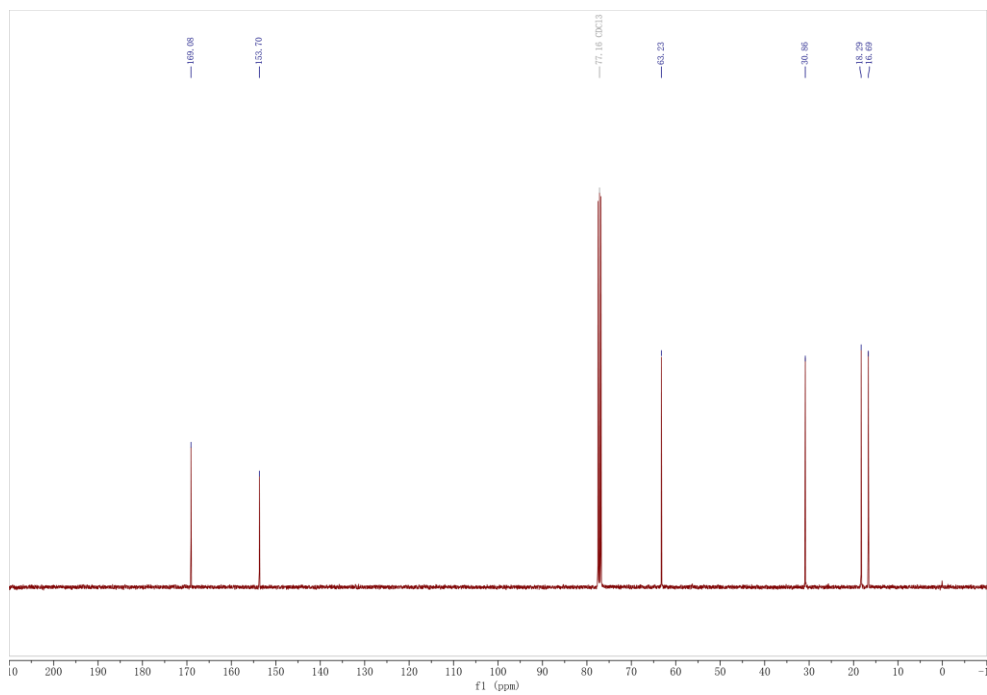

Supplementary Figure 12  $^1\text{H}$  and  $^{13}\text{C}$  NMR spectra of **3f** in  $\text{CDCl}_3$ .

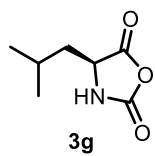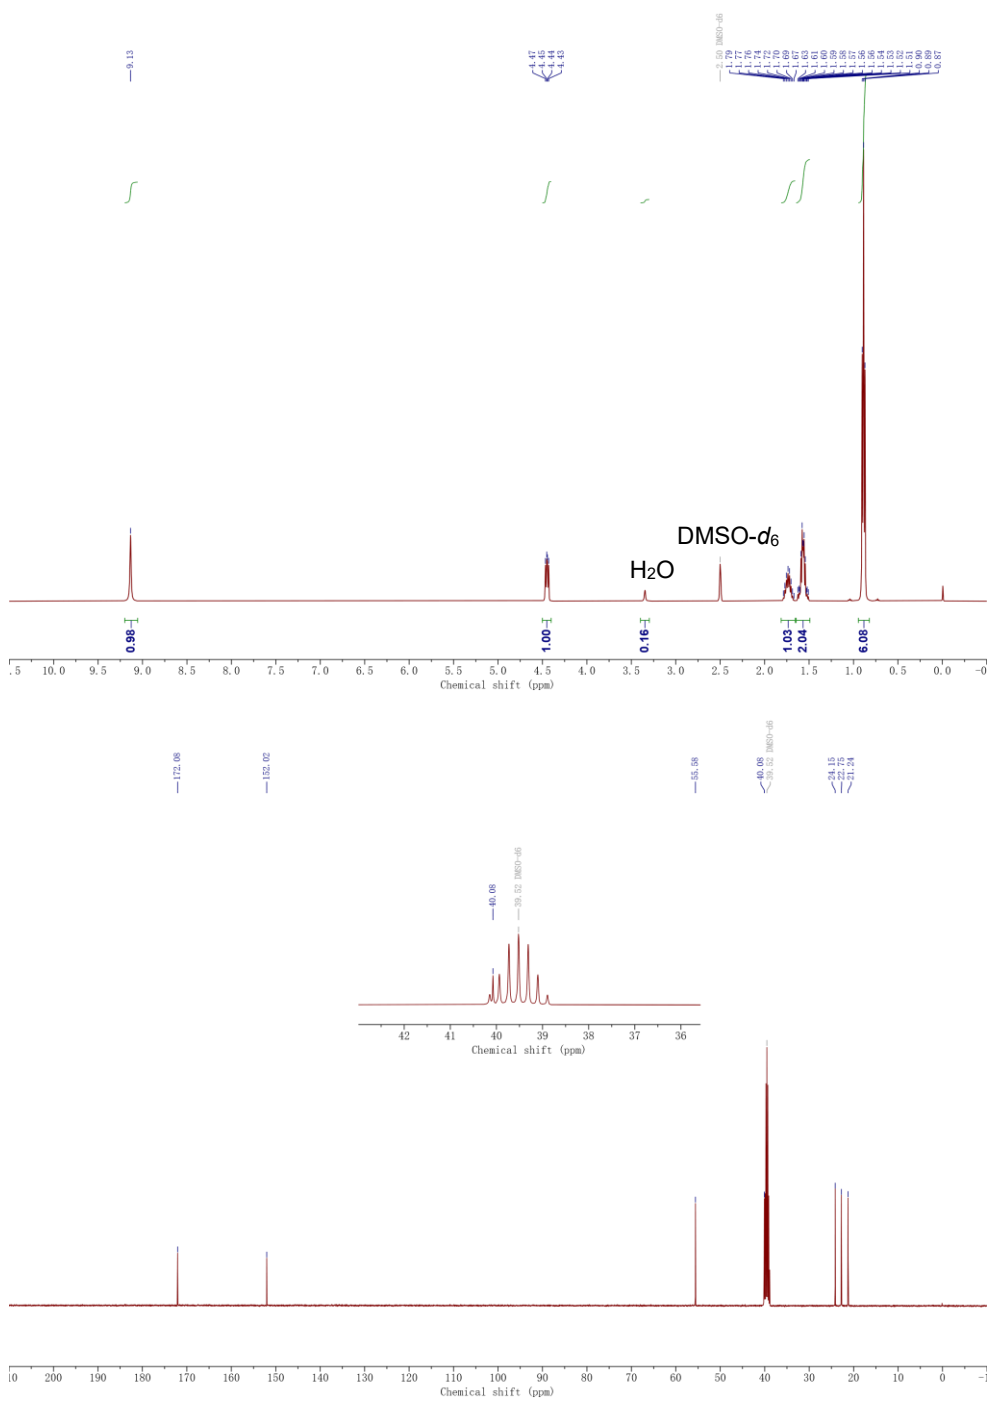

Supplementary Figure 13 <sup>1</sup>H and <sup>13</sup>C NMR spectra of **3g** in DMSO-*d*<sub>6</sub>.



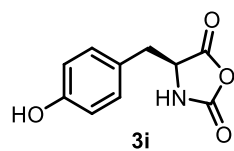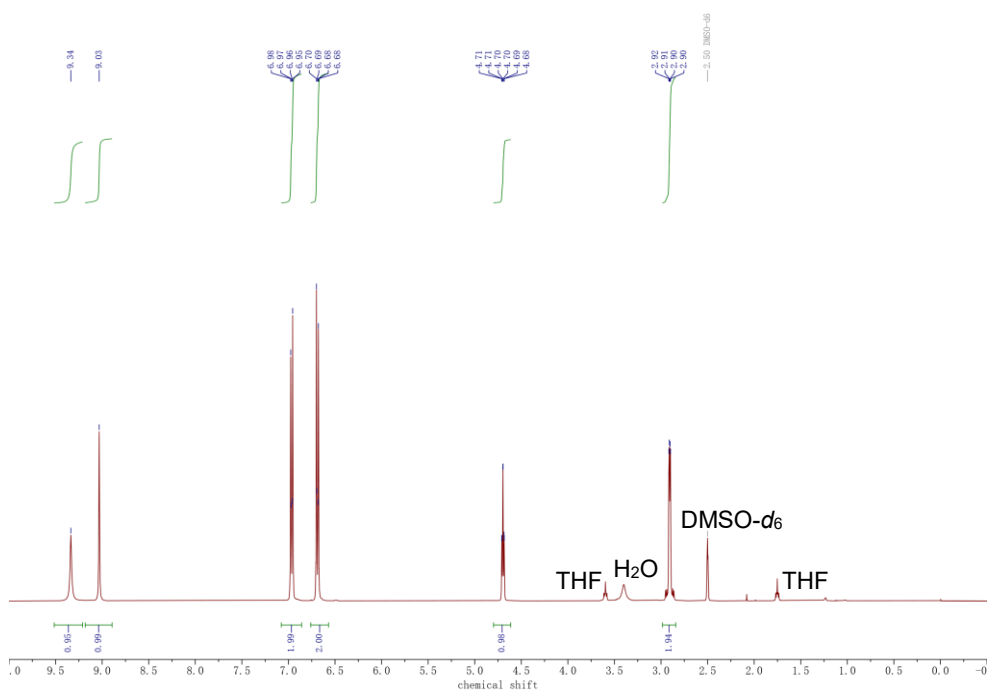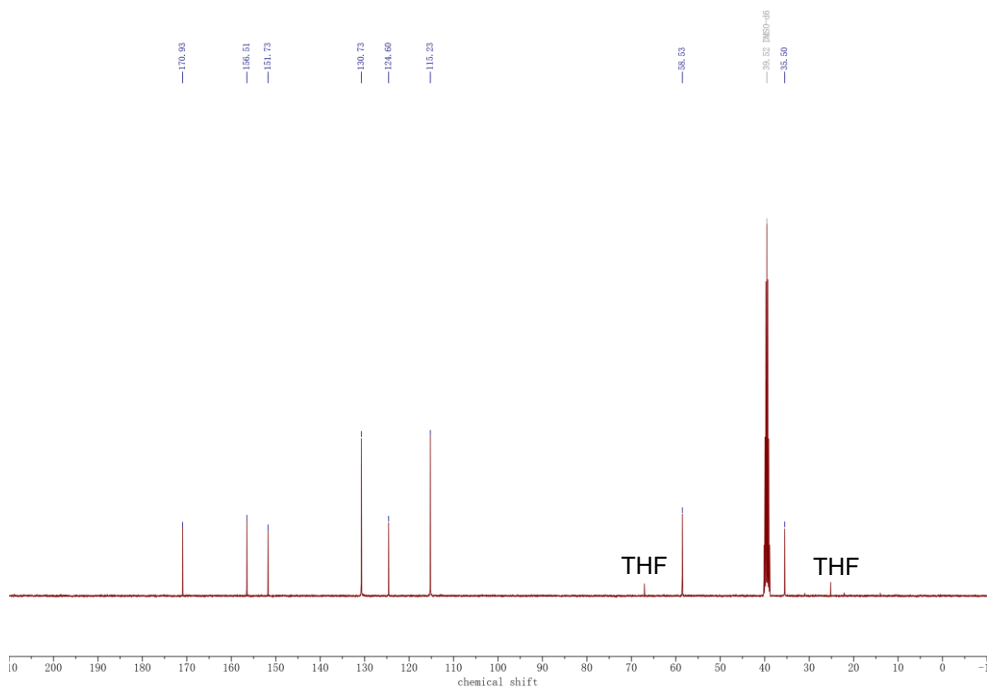

**Supplementary Figure 15 <sup>1</sup>H and <sup>13</sup>C NMR spectra of 3i in DMSO-*d*<sub>6</sub>.**

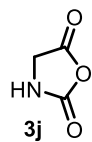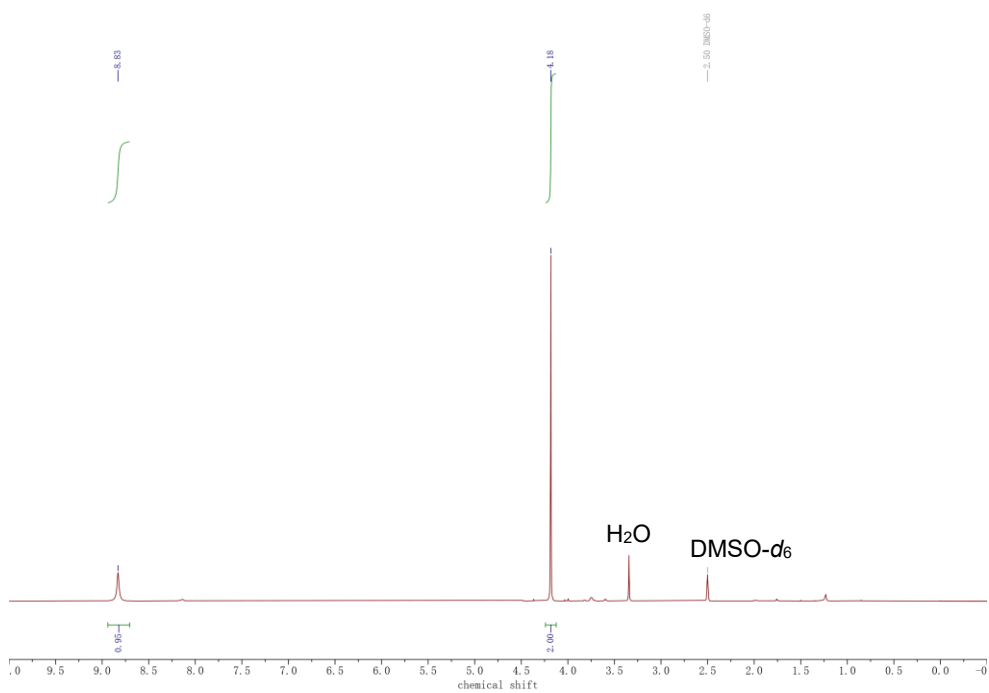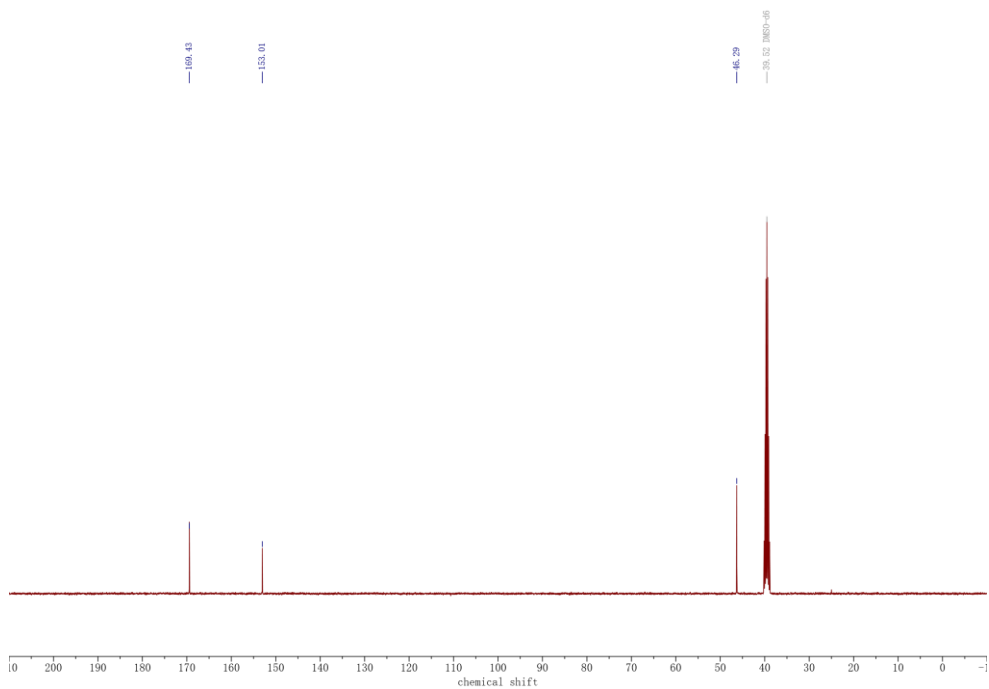

**Supplementary Figure 16**  $^1\text{H}$  and  $^{13}\text{C}$  NMR spectra of **3j** in  $\text{DMSO-}d_6$ .



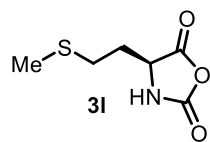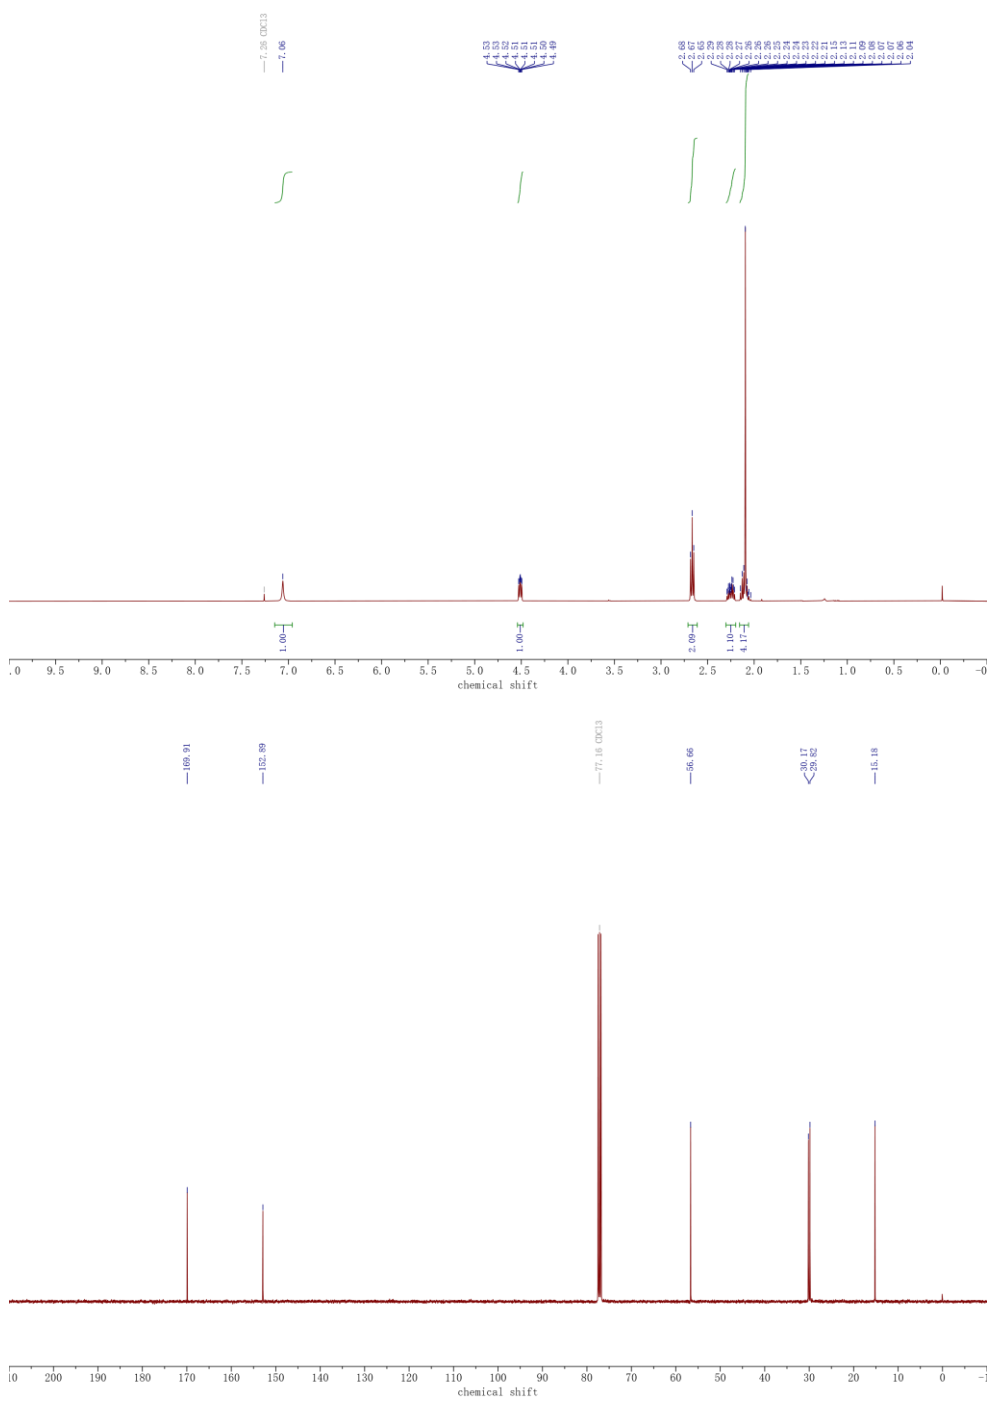

Supplementary Figure 18 <sup>1</sup>H and <sup>13</sup>C NMR spectra of 31 in CDCl<sub>3</sub>.

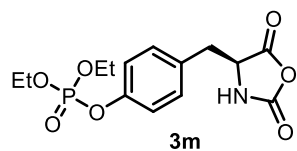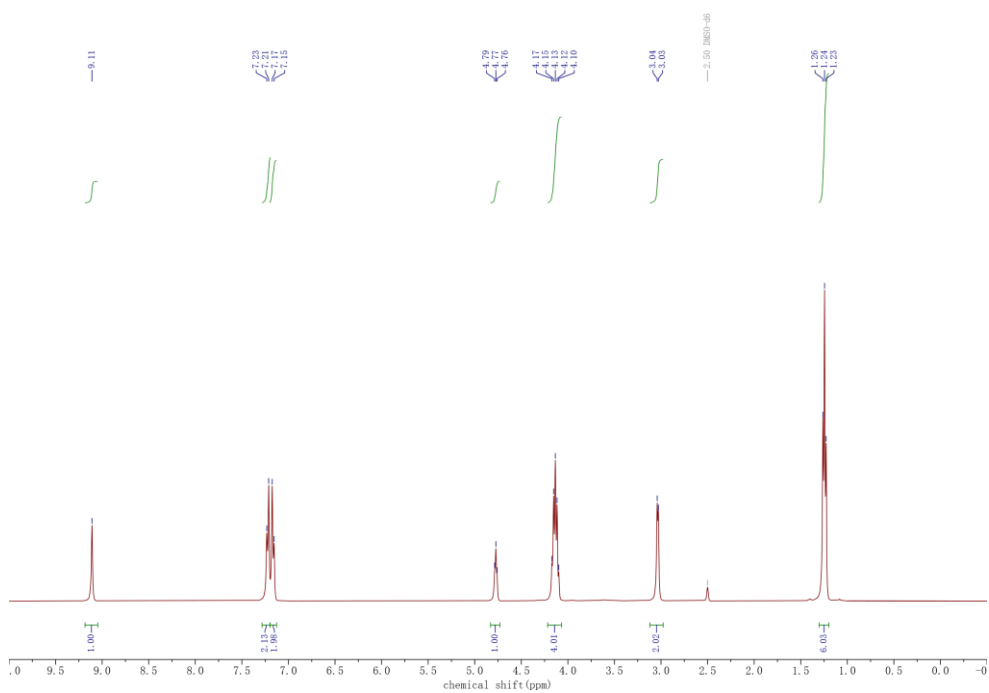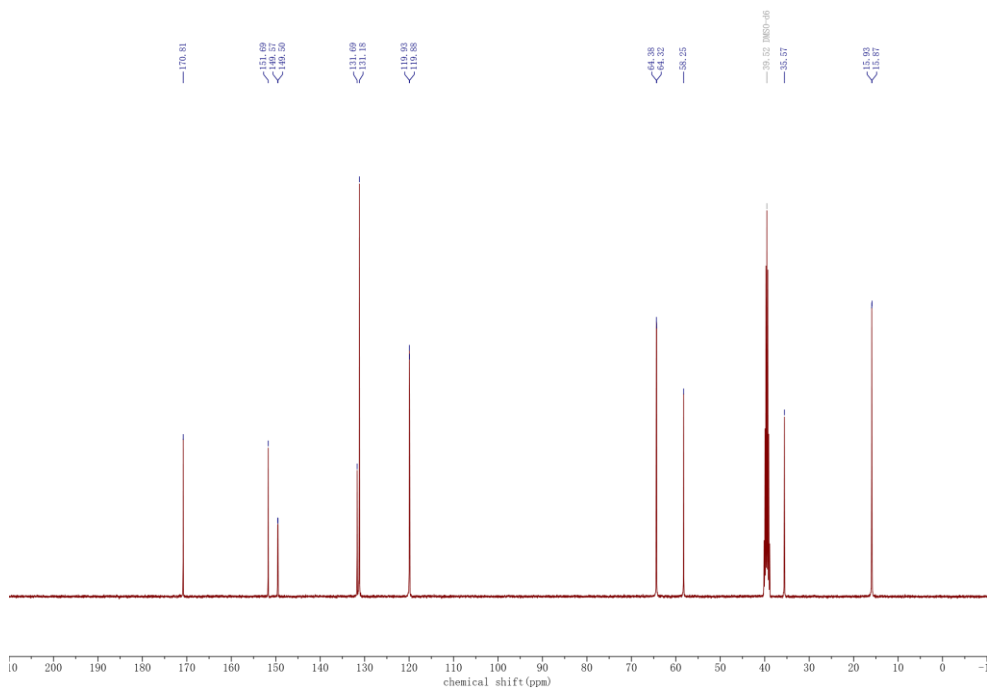

Supplementary Figure 19 <sup>1</sup>H and <sup>13</sup>C NMR spectra of **3m** in DMSO-*d*<sub>6</sub>.



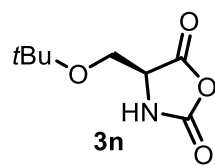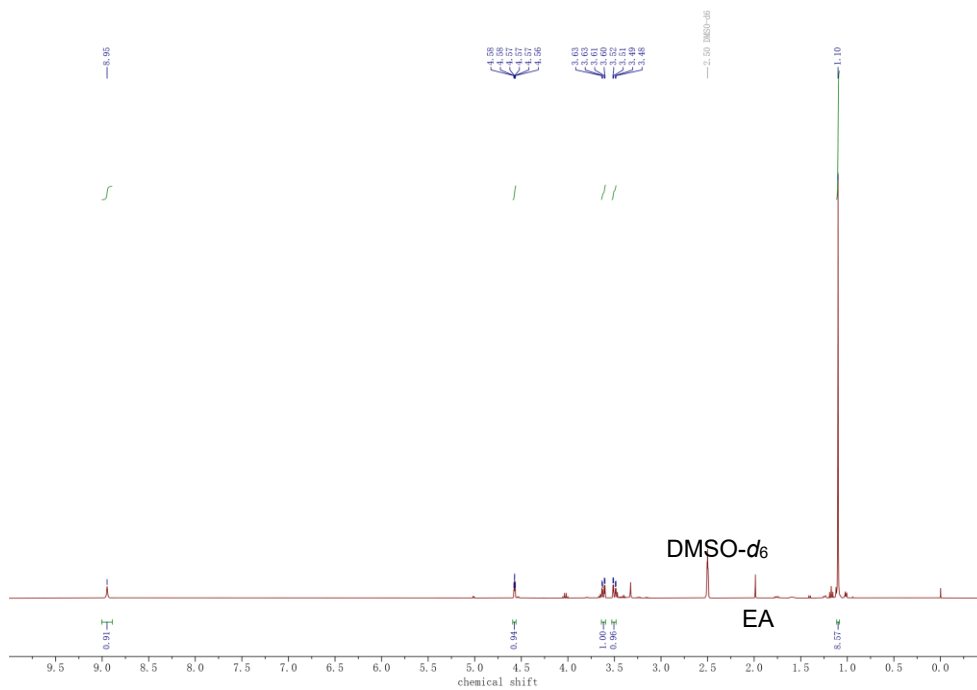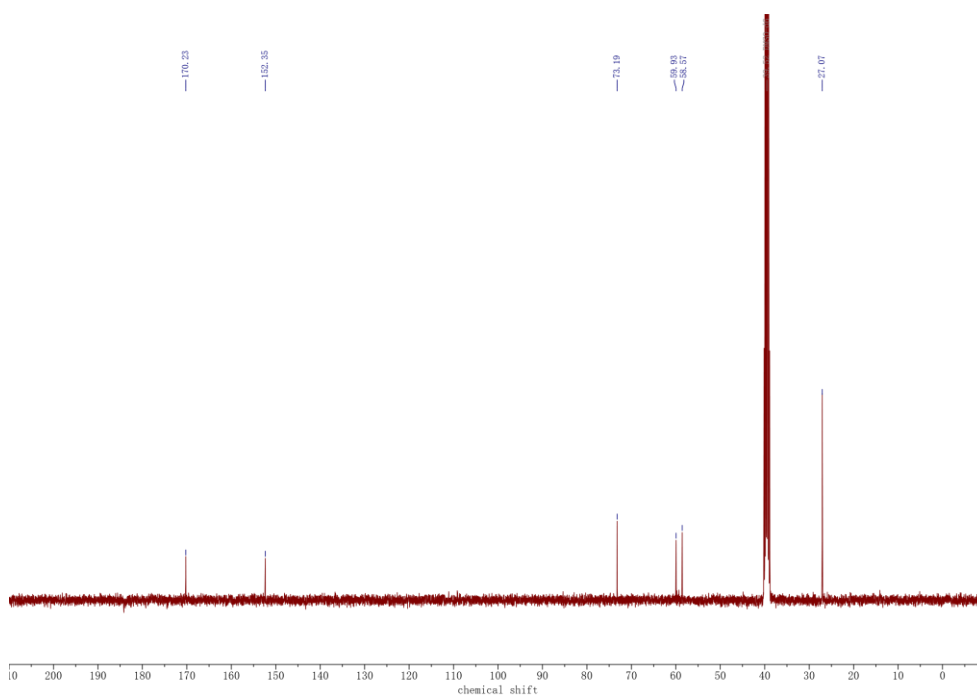

**Supplementary Figure 20** <sup>1</sup>H and <sup>13</sup>C NMR spectra of **3n** in DMSO-*d*<sub>6</sub>.

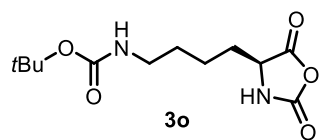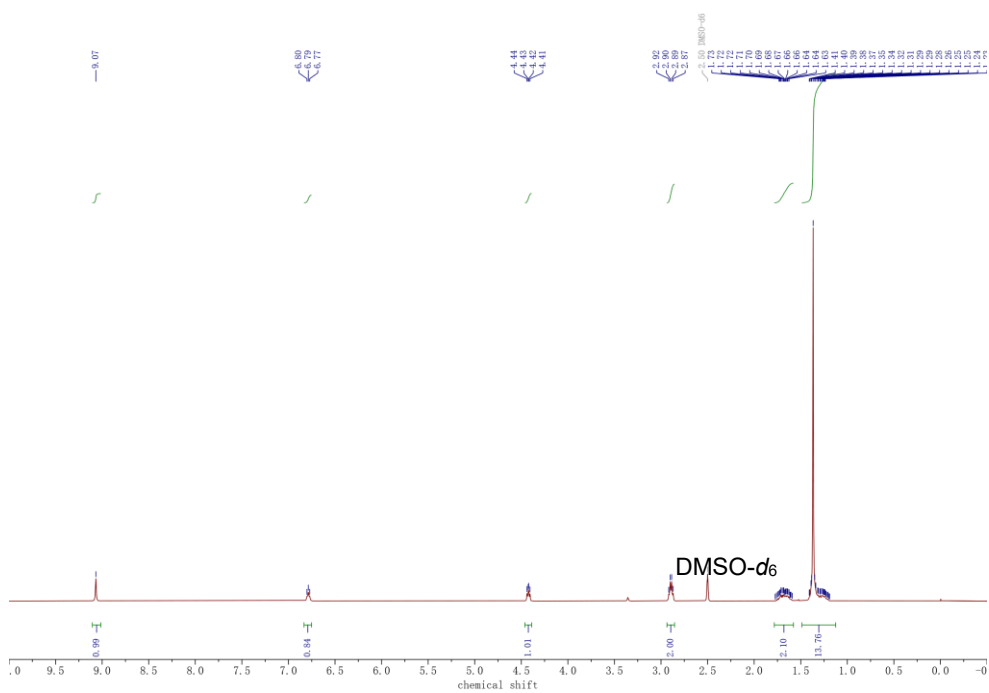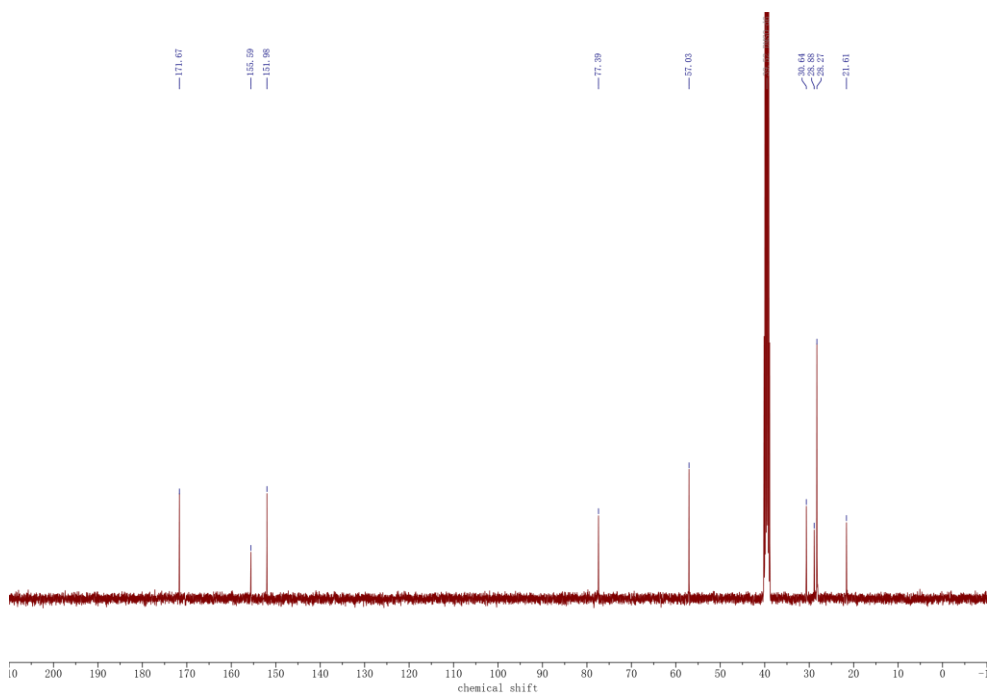

Supplementary Figure 21 <sup>1</sup>H and <sup>13</sup>C NMR spectra of 3o in DMSO-*d*<sub>6</sub>.

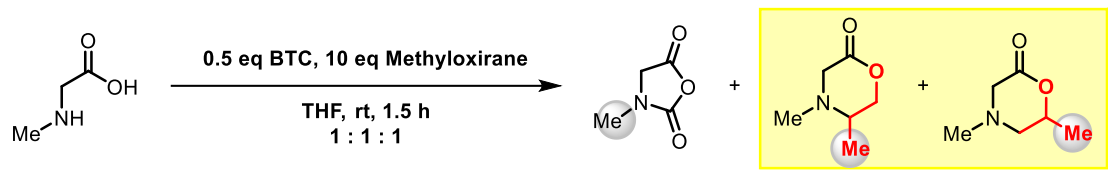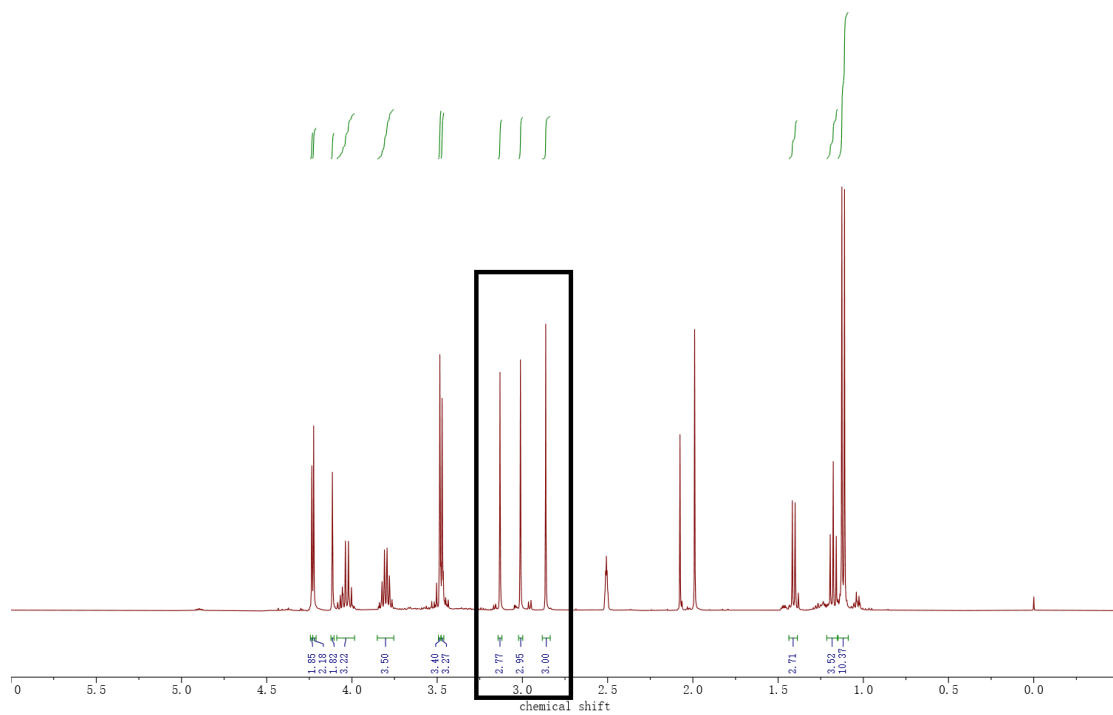

**Supplementary Figure 22 Side products analyses in DMSO-*d*<sub>6</sub>. The ratio of products was based on the integrate of methyl group on nitrogen atom.**

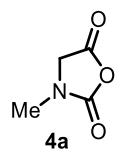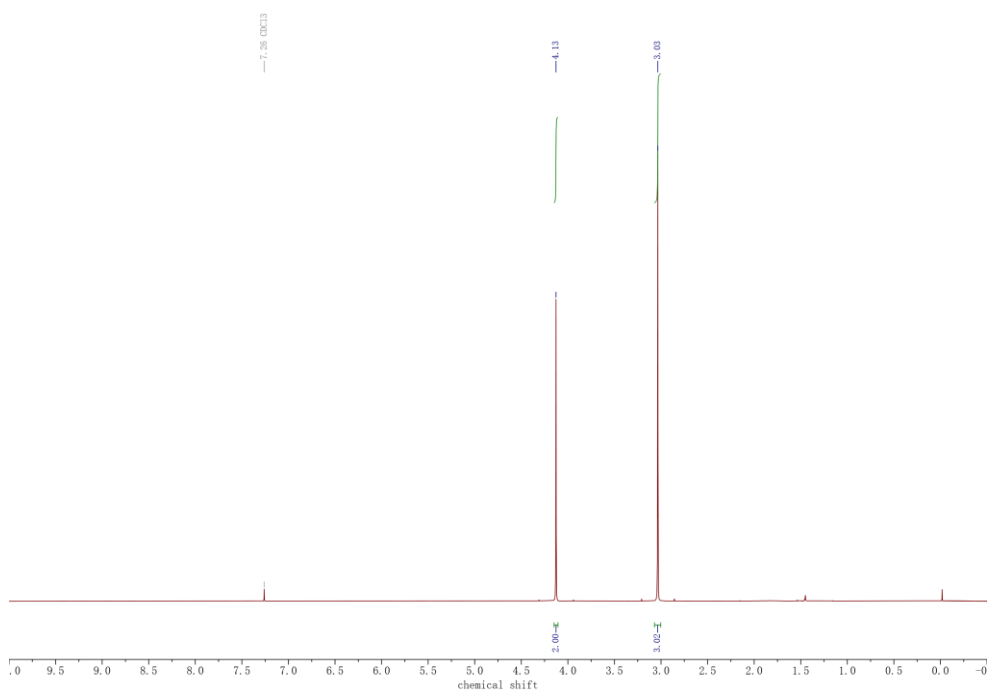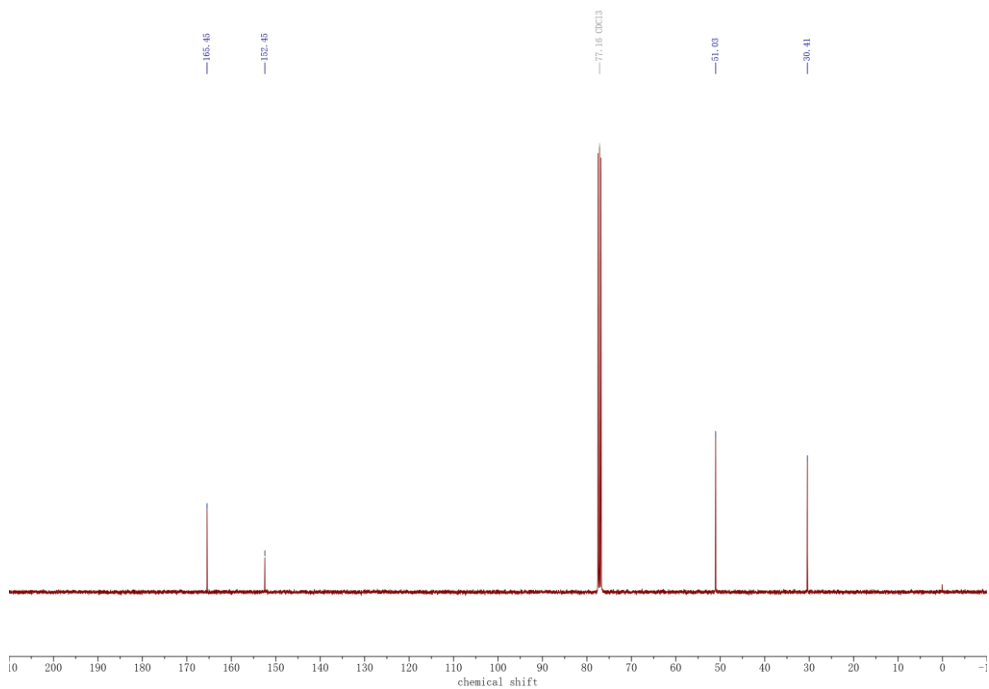

Supplementary Figure 23 <sup>1</sup>H and <sup>13</sup>C NMR spectra of 4a in CDCl<sub>3</sub>.

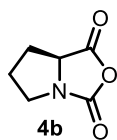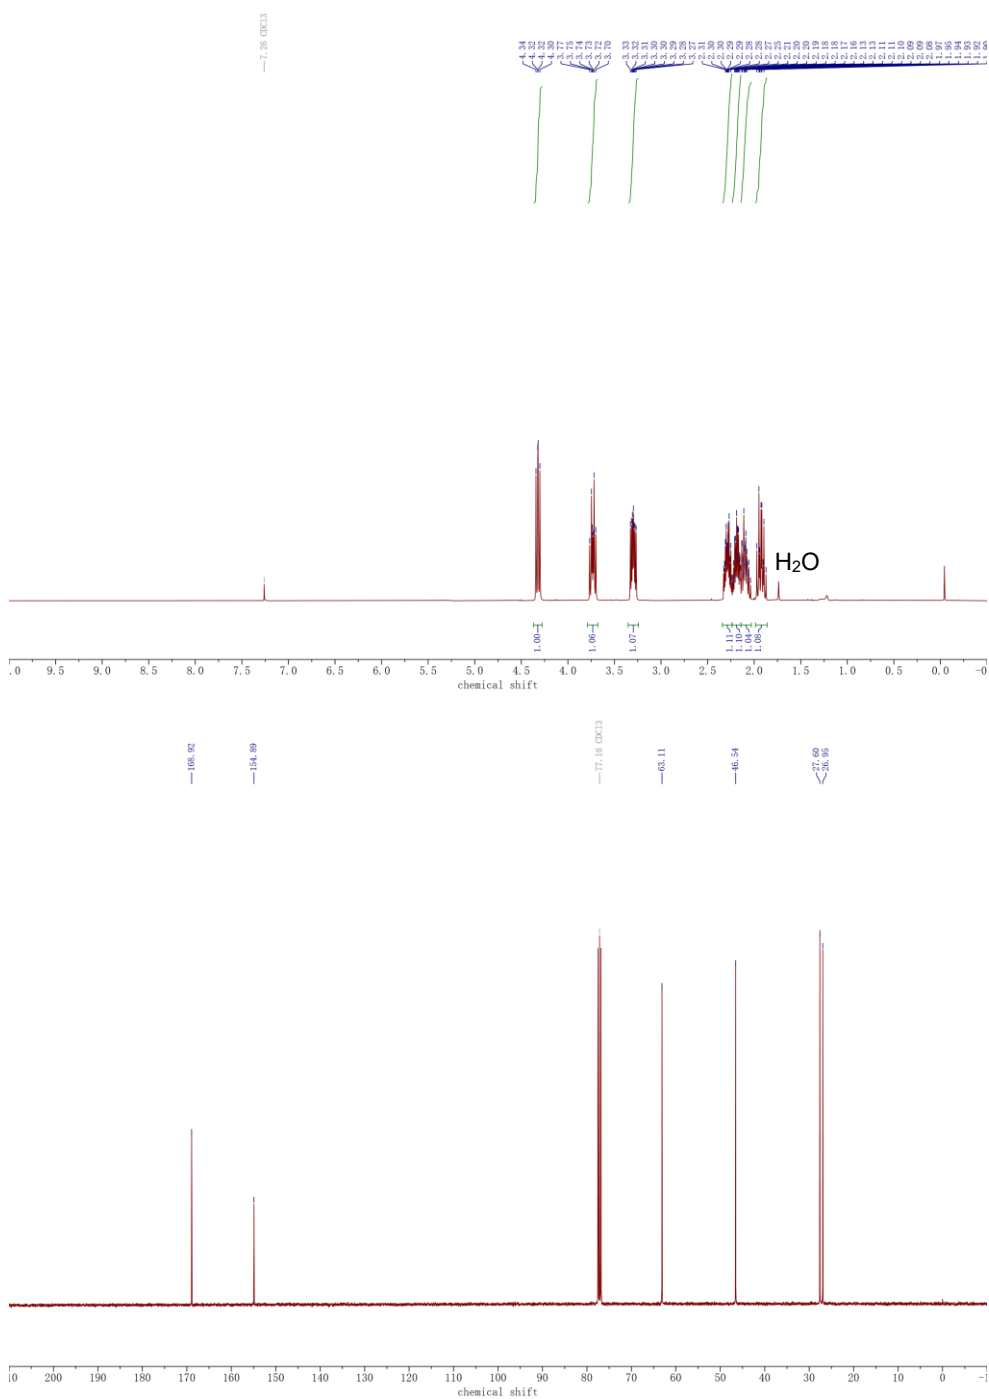

Supplementary Figure 24 <sup>1</sup>H and <sup>13</sup>C NMR spectra of 4b in CDCl<sub>3</sub>.

Supplementary Table 2 ROP of Bn-Glu NCA, Sar NCA, and EG<sub>3</sub>-GluNCA by various initiators

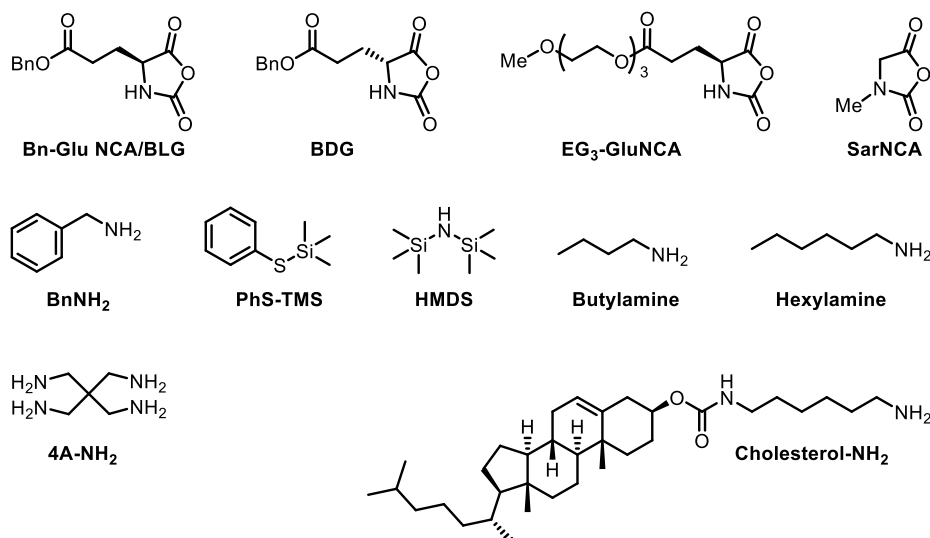

| Entry | Monomer                              | Initiator         | [M] <sub>0</sub> | [M] <sub>0</sub> /[I] <sub>0</sub> | Time | Conv. | Solvent | $M_n$ cal<br>( $\times 10^4$ g mol <sup>-1</sup> ) | <sup>a</sup> $M_n$ obt<br>( $\times 10^4$ g mol <sup>-1</sup> ) | <sup>a</sup> $\bar{D}$ |
|-------|--------------------------------------|-------------------|------------------|------------------------------------|------|-------|---------|----------------------------------------------------|-----------------------------------------------------------------|------------------------|
| 1     | Bn-Glu NCA<br>(Tradition)            | BnNH <sub>2</sub> | 0.20 M           | 50                                 | 12   | > 99% | DMF     | 1.1                                                | 0.7                                                             | 1.24                   |
| 2     | Bn-Glu NCA<br>(Tradition)            | BnNH <sub>2</sub> | 0.20 M           | 100                                | 12 h | > 99% | DMF     | 2.2                                                | 1.5                                                             | 1.05                   |
| 3     | Bn-Glu NCA                           | BnNH <sub>2</sub> | 0.20 M           | 50                                 | 12 h | > 99% | DMF     | 1.1                                                | 1.5                                                             | 1.05                   |
| 4     | Bn-Glu NCA                           | BnNH <sub>2</sub> | 0.20 M           | 100                                | 12 h | > 99% | DMF     | 2.2                                                | 2.2                                                             | 1.05                   |
| 5     | BLG/BDG                              | BnNH <sub>2</sub> | 0.20 M           | 50                                 | 22 h | > 99% | DMF     | 1.0                                                | 1.0                                                             | 1.06                   |
| 6     | EG <sub>3</sub> -GluNCA<br>(Batch 1) | PhS-TMS           | 0.15 M           | 75                                 | 24 h | > 99% | DMF     | 2.1                                                | 2.0                                                             | 1.07                   |
| 7     | EG <sub>3</sub> -GluNCA<br>(Batch 2) | PhS-TMS           | 0.15 M           | 75                                 | 20 h | > 99% | DMF     | 2.1                                                | 2.0                                                             | 1.06                   |
| 8     | EG <sub>3</sub> -GluNCA<br>(Batch 2) | HMDS              | 0.15 M           | 73                                 | 24 h | > 99% | DMF     | 2.0                                                | 2.0                                                             | 1.13                   |
| 9     | EG <sub>3</sub> -GluNCA<br>(Batch 3) | HMDS              | 0.31 M           | 73                                 | 12 h | > 99% | DMF     | 2.0                                                | 1.9                                                             | 1.05                   |
| 10    | EG <sub>3</sub> -GluNCA<br>(Batch 3) | HMDS              | 0.31 M           | 73                                 | 18 h | > 99% | DMF     | 2.0                                                | 1.9                                                             | 1.07                   |
| 11    | EG <sub>3</sub> -GluNCA<br>(Batch 3) | HMDS              | 0.31 M           | 73                                 | 12 h | > 99% | DMF     | 2.0                                                | 1.9                                                             | 1.07                   |
| 12    | EG <sub>3</sub> -GluNCA<br>(Batch 4) | HMDS              | 0.31 M           | 77                                 | 22 h | > 99% | DMF     | 2.1                                                | 1.9                                                             | 1.08                   |
| 13    | EG <sub>3</sub> -GluNCA<br>(Batch 2) | Butylamine        | 0.31 M           | 75                                 | 12 h | > 99% | DMF     | 2.1                                                | 1.9                                                             | 1.13                   |

|           |                                   |                             |        |     |      |       |     |     |     |      |
|-----------|-----------------------------------|-----------------------------|--------|-----|------|-------|-----|-----|-----|------|
| <b>14</b> | EG <sub>3</sub> -GluNCA (Batch 5) | Hexylamine                  | 0.31 M | 50  | 12 h | > 99% | DMF | 1.4 | 1.2 | 1.16 |
| <b>15</b> | EG <sub>3</sub> -GluNCA           | Cholesterol-NH <sub>2</sub> | 0.2 M  | 40  | 22 h | > 99% | DMF | 1.1 | 1.1 | 1.06 |
| <b>16</b> | SarNCA                            | Hexylamine                  | 1.1 M  | 150 | 12 h | > 99% | DMF | 1.1 | 1.0 | 1.07 |
| <b>17</b> | SarNCA Batch 1                    | 4A-NH <sub>2</sub>          | 1.0 M  | 250 | 16 h | > 99% | DMF | 1.8 | 1.8 | 1.01 |
| <b>18</b> | SarNCA (Batch 2)                  | 4A-NH <sub>2</sub>          | 1.0 M  | 250 | 16 h | > 99% | DMF | 1.8 | 1.7 | 1.04 |
| <b>19</b> | SarNCA (Batch 3)                  | 4A-NH <sub>2</sub>          | 1.0 M  | 250 | 16 h | > 99% | DMF | 1.8 | 1.7 | 1.01 |
| <b>20</b> | SarNCA (Batch 4)                  | 4A-NH <sub>2</sub>          | 1.0 M  | 250 | 16 h | > 99% | DMF | 1.8 | 1.8 | 1.01 |

<sup>a</sup>absolute  $M_n$  obtained from SEC equipped with a multi-angle light scattering detector using 0.1 M LiBr in DMF as the mobile phase. PBLG dn/dc = 0.093 mL/g polysarcosine dn/dc = 0.096 mL/g, P(EG<sub>3</sub>-Glu) dn/dc = 0.069 mL/g.

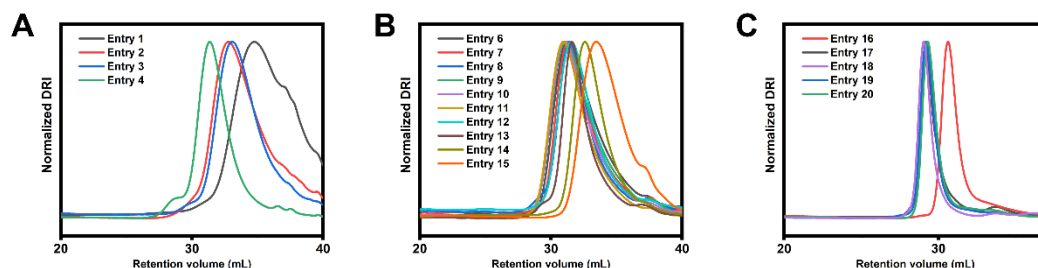

**Supplementary Figure 25 (A) GPC of entry 1 to 5. (B) GPC of entry 6 to 15. (C) GPC of entry 16 to 20.**

**Discussion:** we tested the ROP of Bn-Glu NCA, Sar NCA, and EG<sub>3</sub>-GluNCA (Supplementary Table 2 and Supplementary Figure 25), three most frequently used monomers in our lab. Our results indicated that each of these monomers produced the corresponding polypeptide with a well-defined structure, a predictable molar mass ( $M_n$ ), and narrow dispersity ( $\mathcal{D}$ ). For example, when conducted in parallel, benzyl amine (BnNH<sub>2</sub>)-mediated ROP of BLG-NCA prepared from the traditional (entry 1-2) method showed poorer  $M_n$  control compared to the same reaction using monomers that were synthesized by our new method (entry 3-5). Moreover, the good reproducibility was demonstrated by our observation that the  $M_n$  and  $\mathcal{D}$  of the polypeptide products remained largely unchanged regardless of the monomer batch or who performed the synthesis (entry 6&7, entry 8-11, and entry 17-20). We also tested a variety of initiators, including BnNH<sub>2</sub> (entry 3-5), hexyl amine (entry 14 and 16), butyl amine (entry 13), cholesterol amine (entry 15), a four-armed amine initiator (4A-NH<sub>2</sub>, entry 17-20), Hexamethyldisilazane (HMDS, entry 8-12), and trimethylsilyl phenylsulfide (PhSTMS, entry 6-7). The results revealed that our

new method could confer satisfactory and consistent control of both  $M_n$  and  $D$ . The reproducibility of entry 6&7 is remarkable because PhSTMS-mediated ROP is very sensitive to the purity of monomer based on own experience. All together, these experimental data provided sufficient evidence that the NCAs prepared by the method detailed in this study (with PO or ECH) have the same, if not higher, quality and purity as those afforded by the traditional approach.



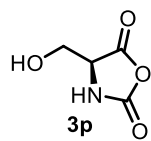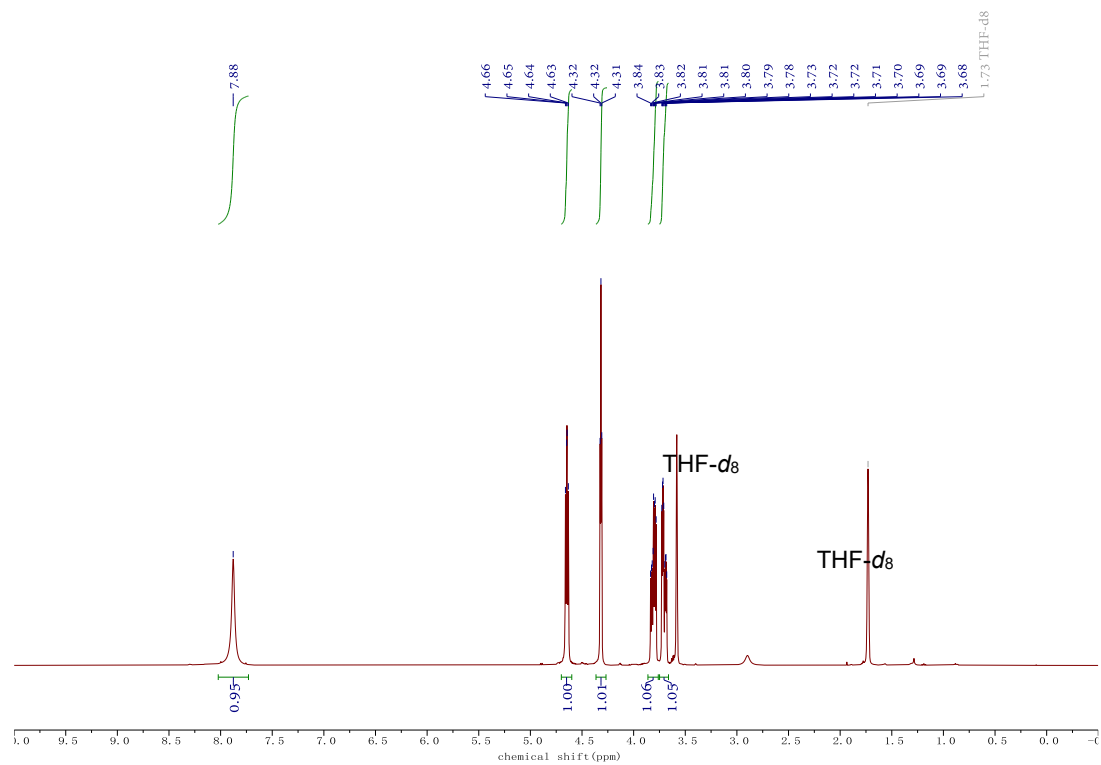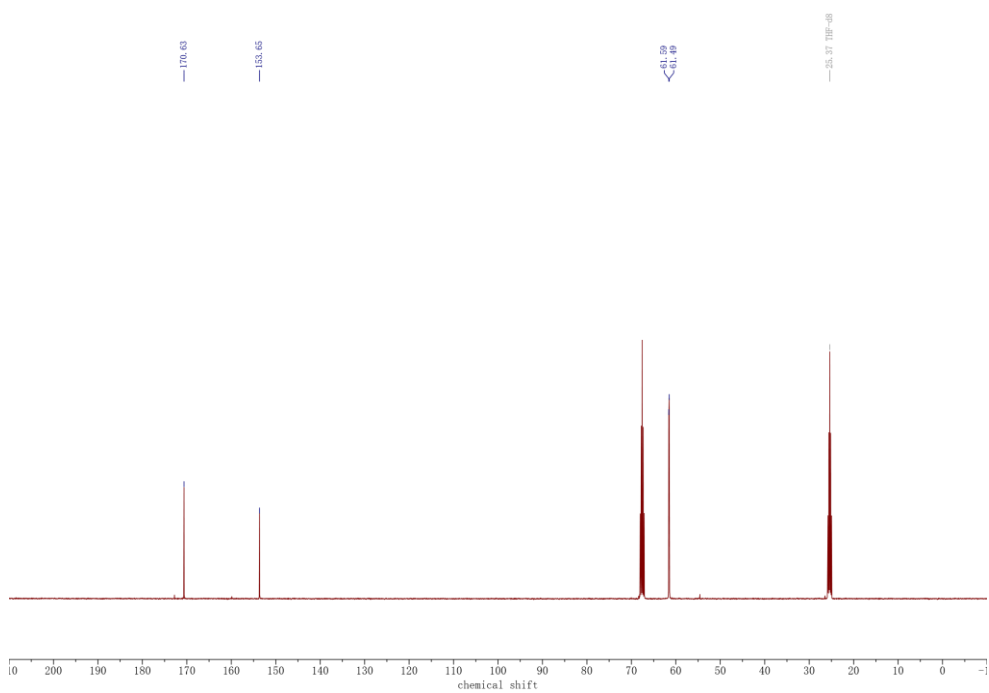

Supplementary Figure 26  $^1\text{H}$  and  $^{13}\text{C}$  NMR spectra of 3p in THF- $d_8$ .

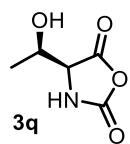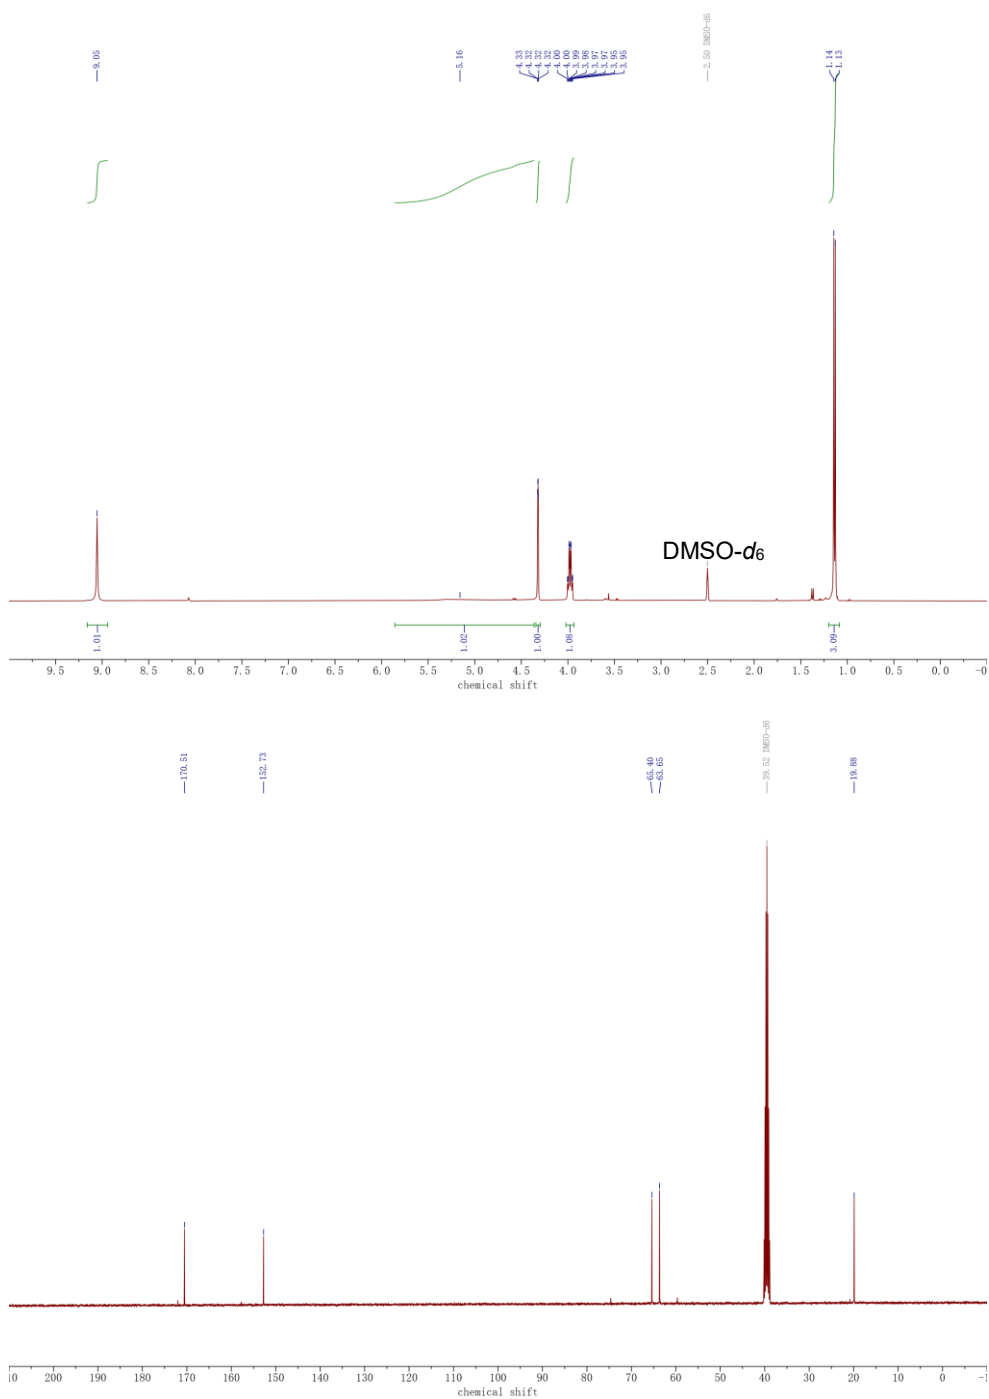

**Supplementary Figure 27 <sup>1</sup>H and <sup>13</sup>C NMR spectra of 3q in DMSO-*d*<sub>6</sub>.**

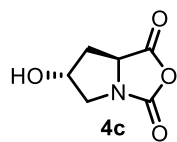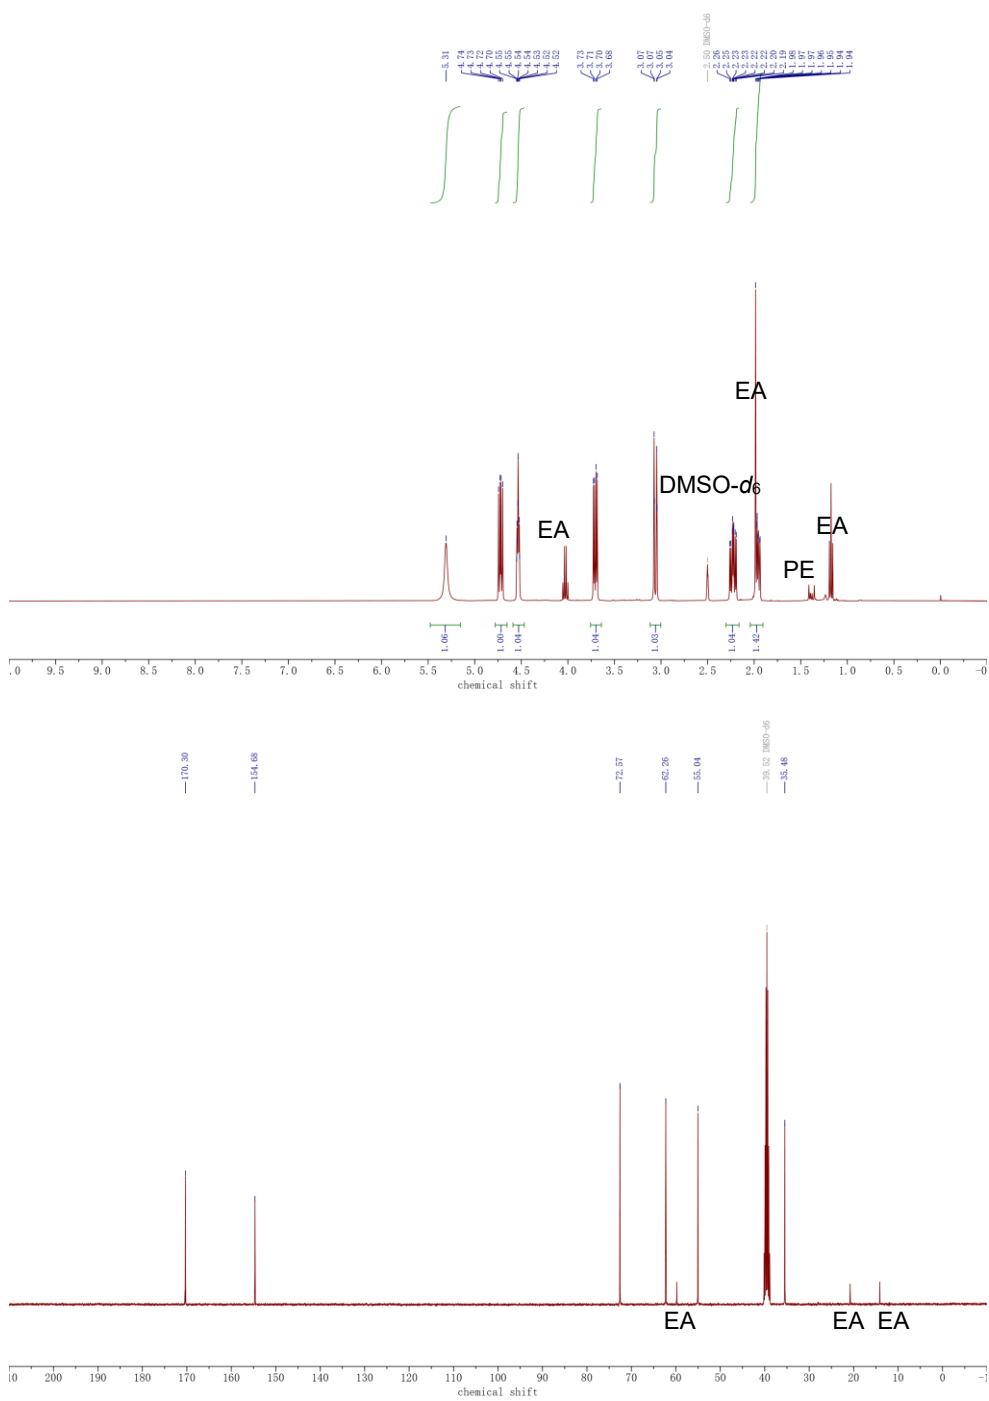

Supplementary Figure 28 <sup>1</sup>H and <sup>13</sup>C NMR spectra of 4c in DMSO-*d*<sub>6</sub>.

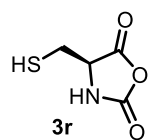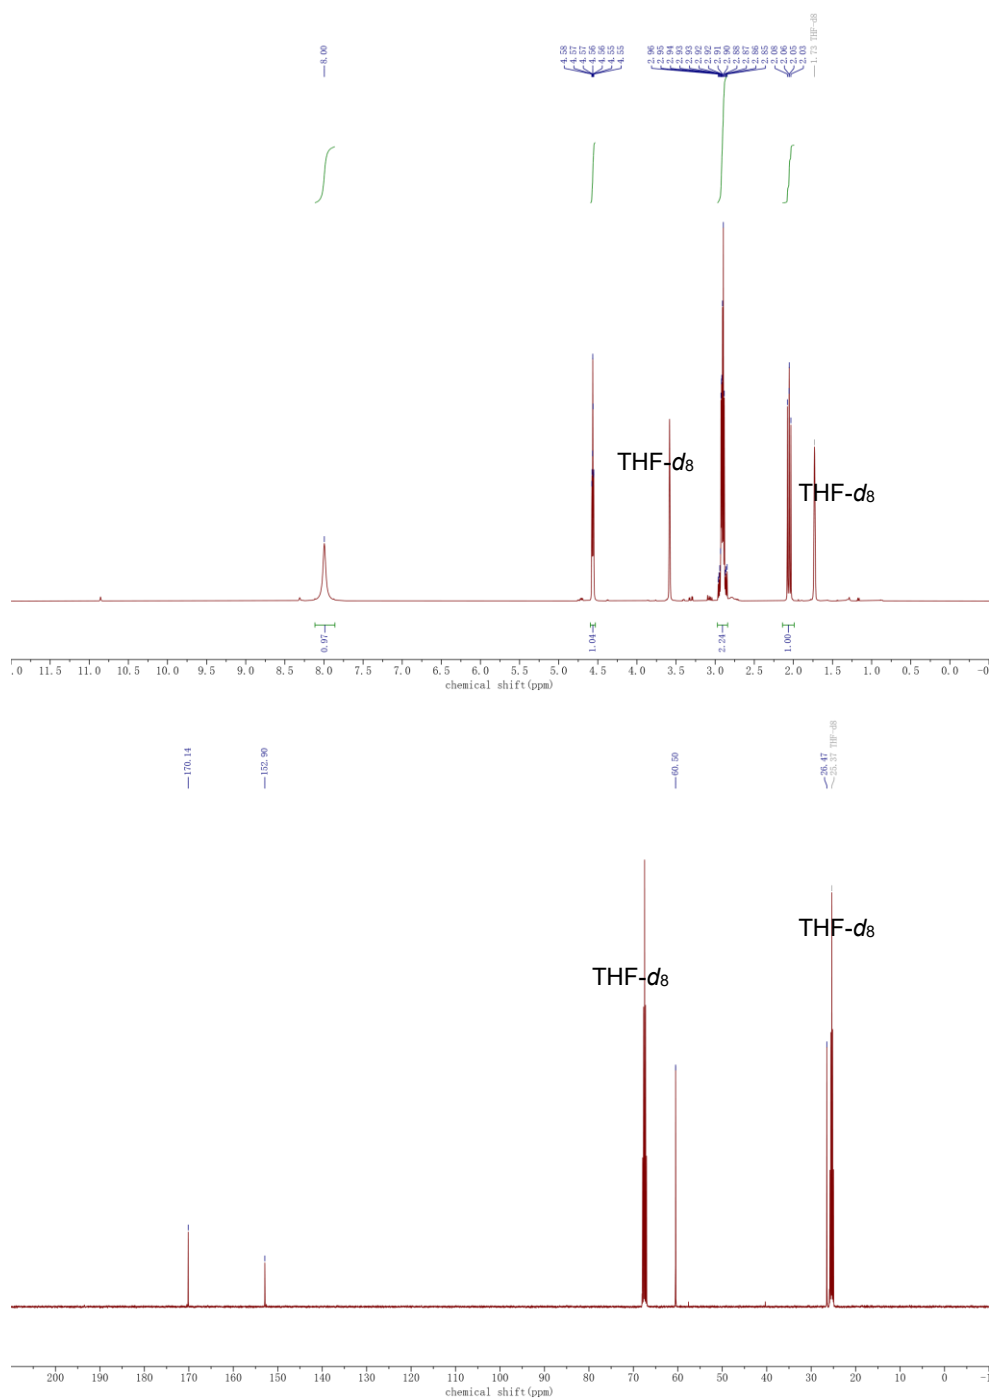

Supplementary Figure 29 <sup>1</sup>H and <sup>13</sup>C NMR spectra of 3r in THF-*d*<sub>8</sub>.

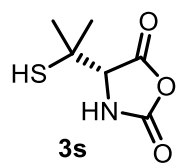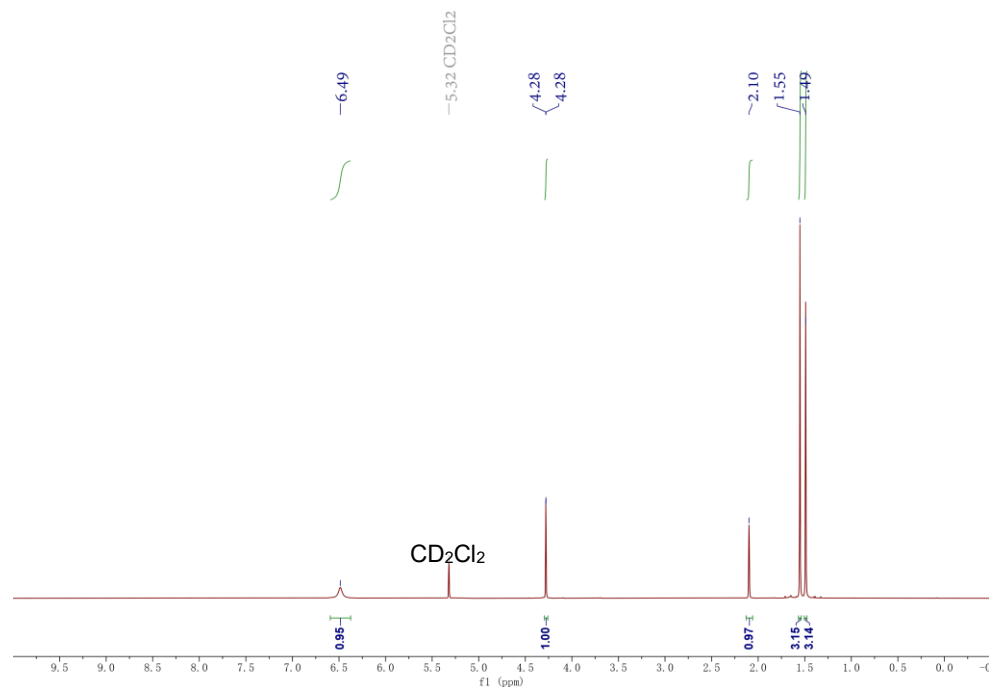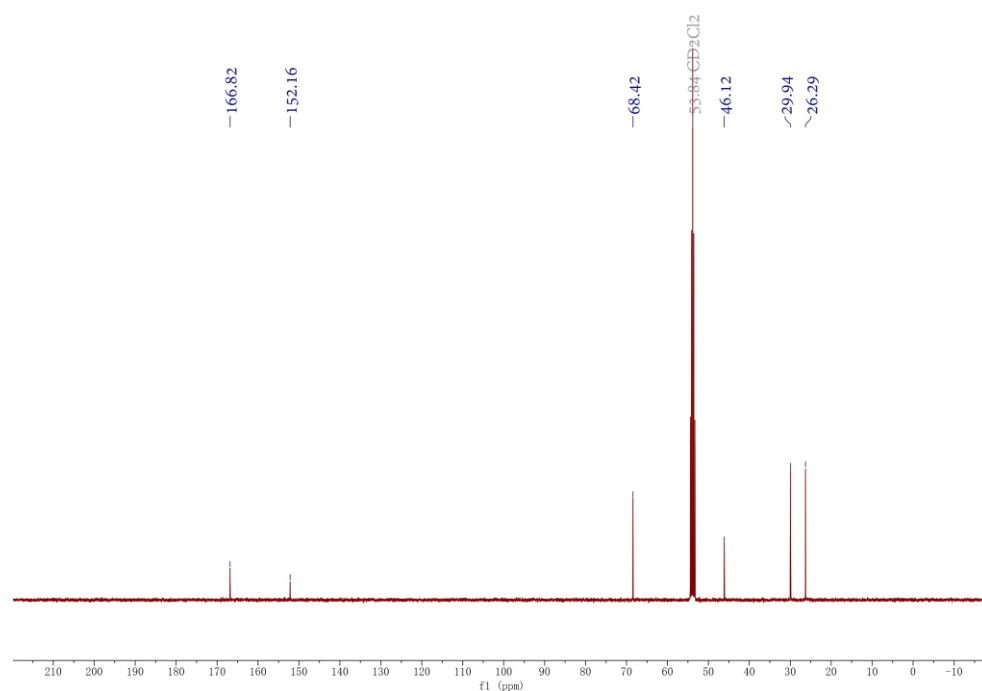

Supplementary Figure 30  $^1\text{H}$  and  $^{13}\text{C}$  NMR spectra of **3s** in  $\text{CD}_2\text{Cl}_2$ .



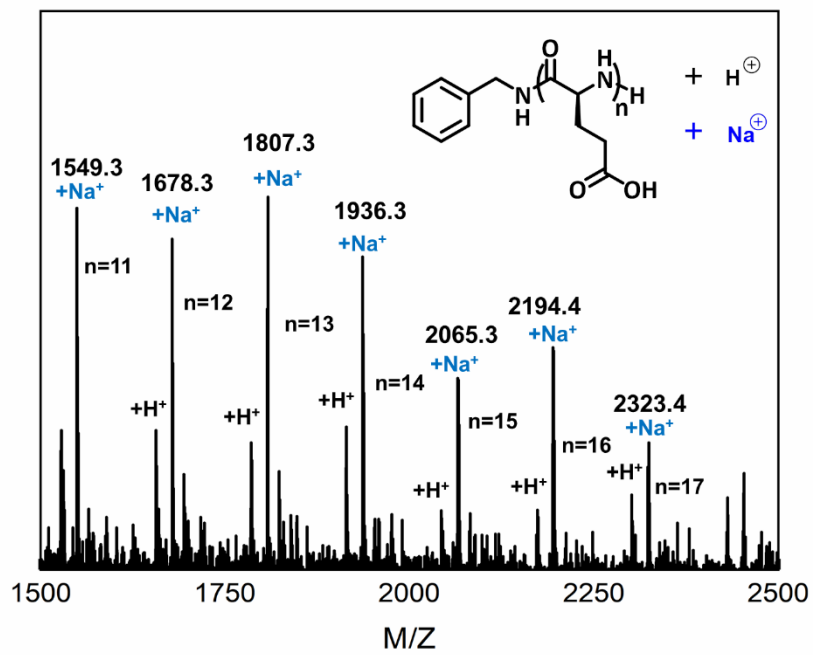

Supplementary Figure 32 MALDI-TOF mass spectrometry of poly(L-glutamic acid).

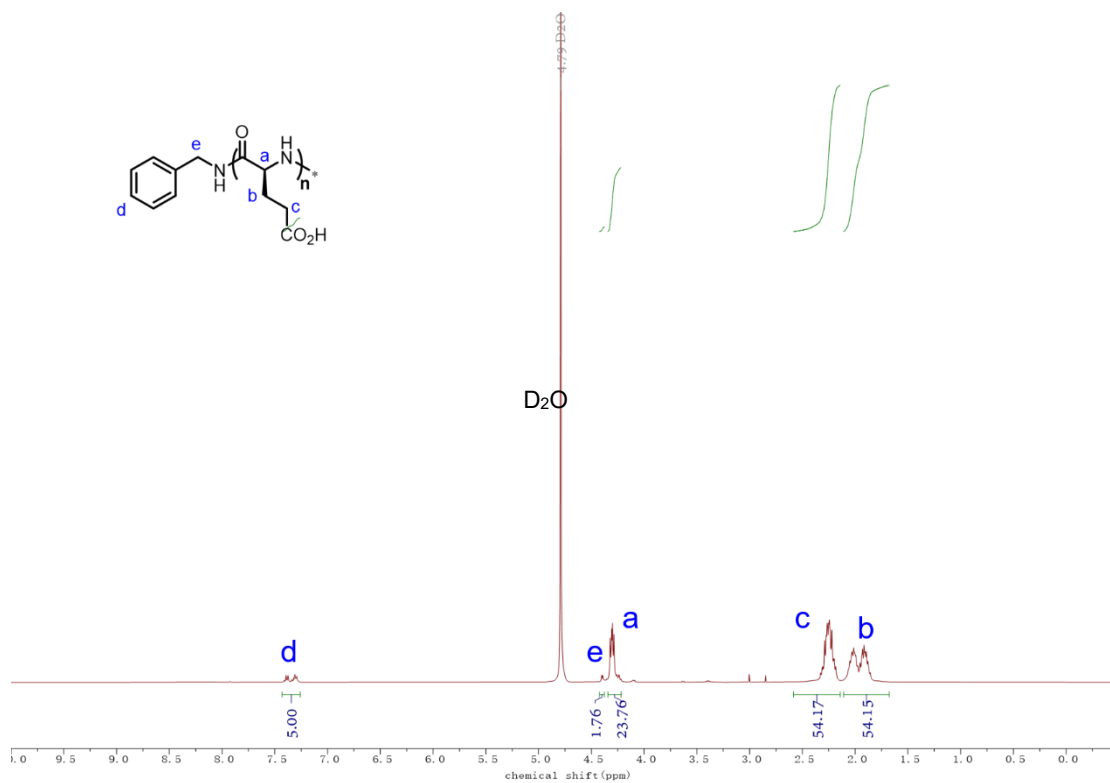

Supplementary Figure 33  $^1\text{H}$  NMR spectra of poly-L-glutamic acid.  $n = 20:1$  in  $\text{NaOD}/\text{D}_2\text{O}$ .

$\text{D}_2\text{O}$



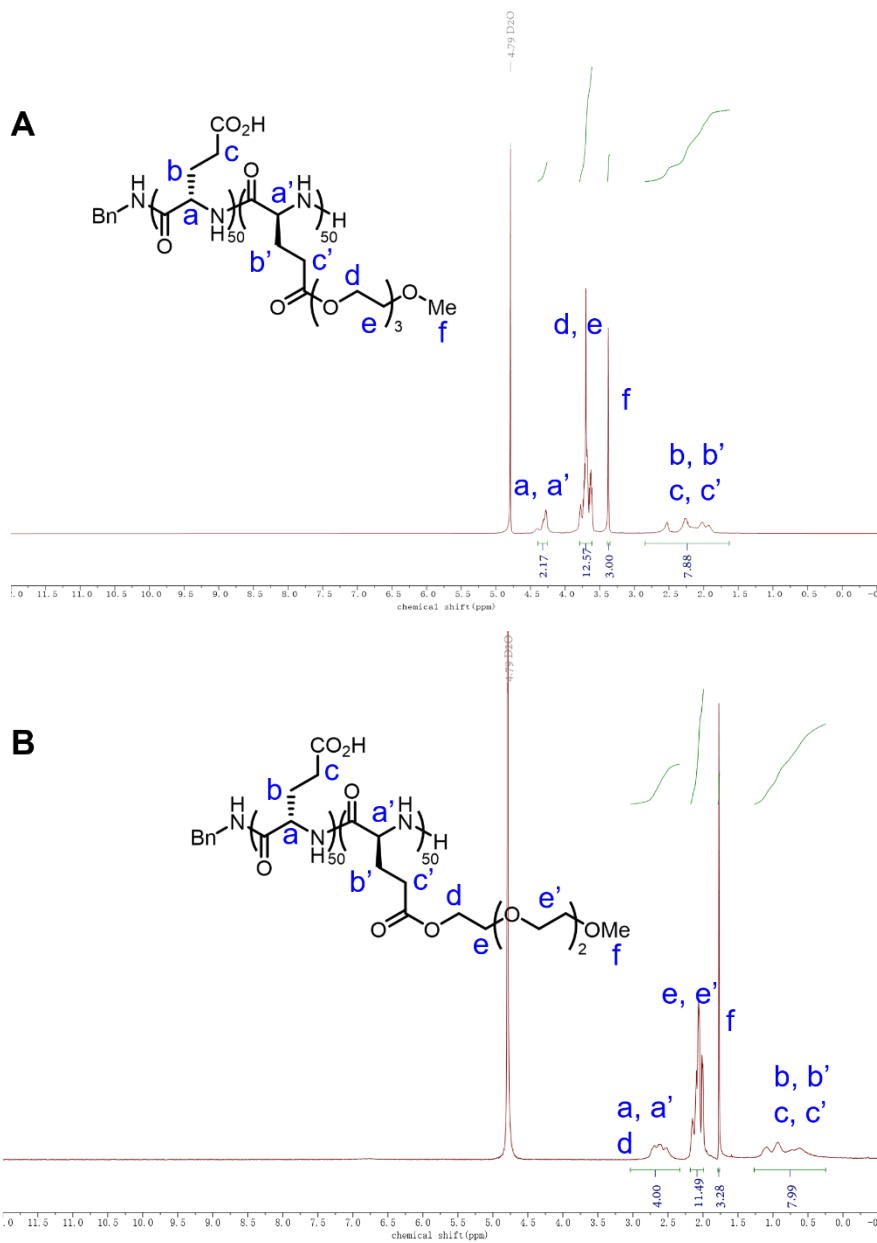

**Supplementary Figure 34**  $^1\text{H}$  NMR spectra of PLG-*block*-P(EG<sub>3</sub>-Glu) in (A) NaOD/D<sub>2</sub>O (B) TFA-*d*/D<sub>2</sub>O

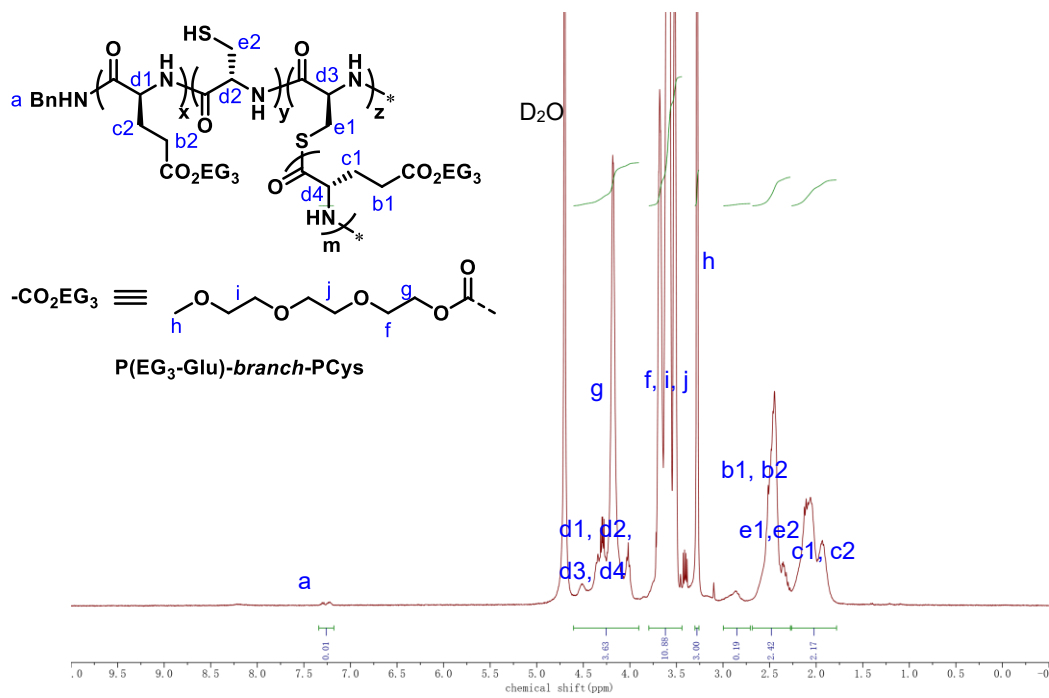

Supplementary Figure 35 <sup>1</sup>H NMR spectra of P(EG<sub>3</sub>-Glu)-branch-PCys in D<sub>2</sub>O

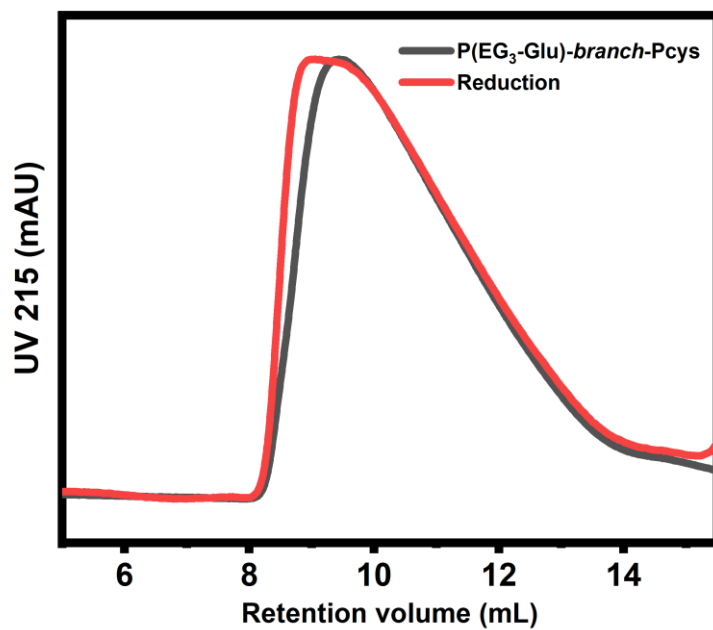

Supplementary Figure 36. Overlay of the aqueous SEC traces of P(EG<sub>3</sub>-Glu)-*branch*-Pcys before (black) and after (red) treatment of TCEP.

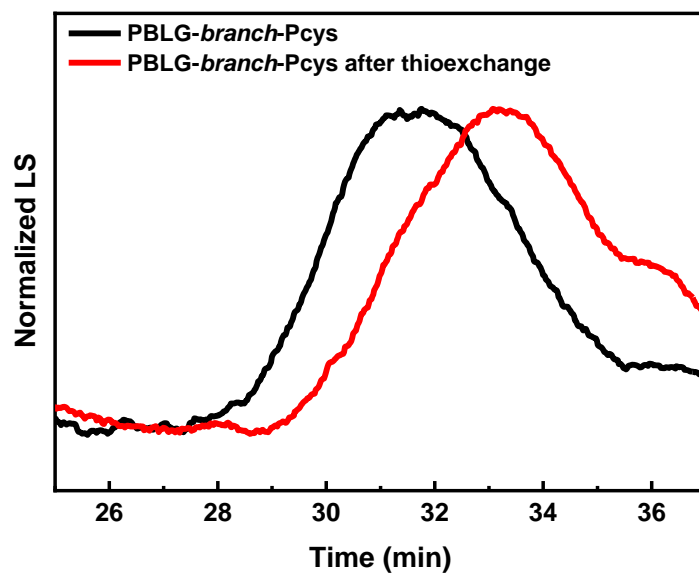

Supplementary Figure 37. DMF-phased SEC of PBLG-*branch*-Pcys and corresponding thioexchange.

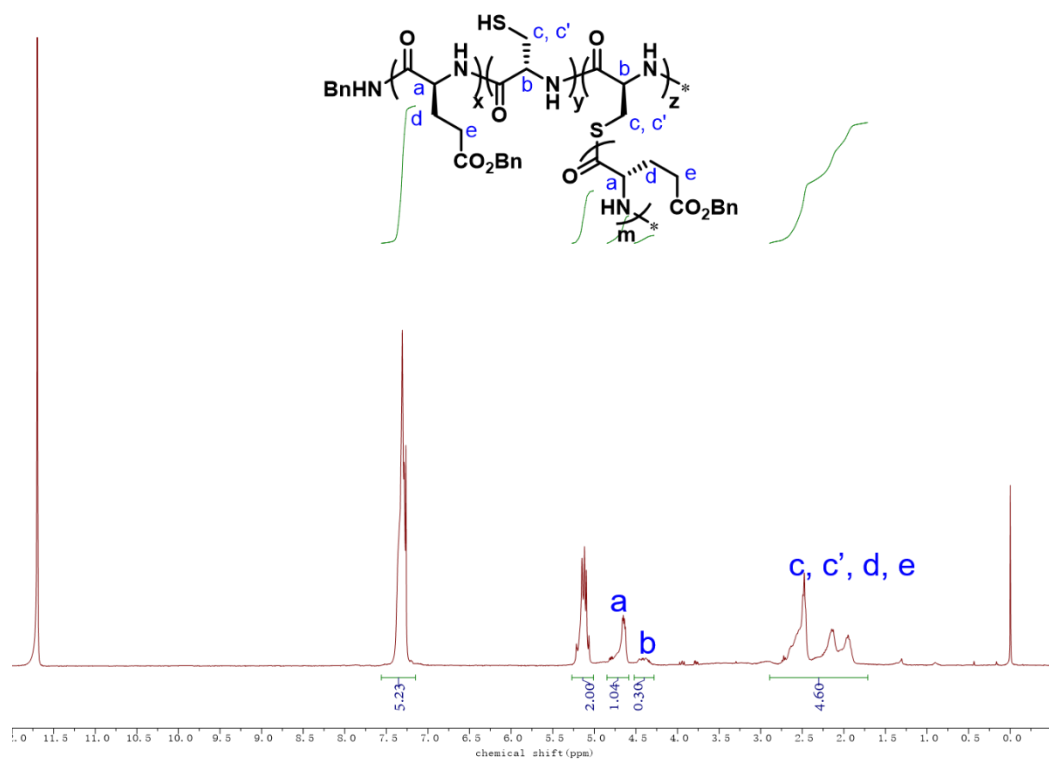

Supplementary Figure 38. <sup>1</sup>H NMR spectra of PBLG-branch-Pcys

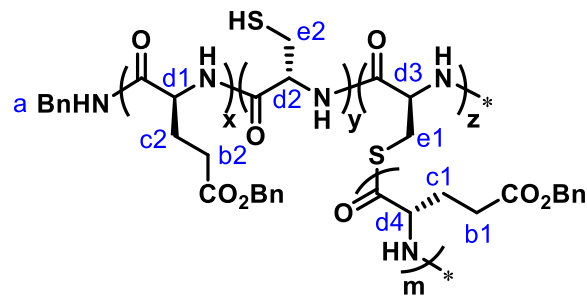

PBLG-branch-Pcys

H-H COSEY

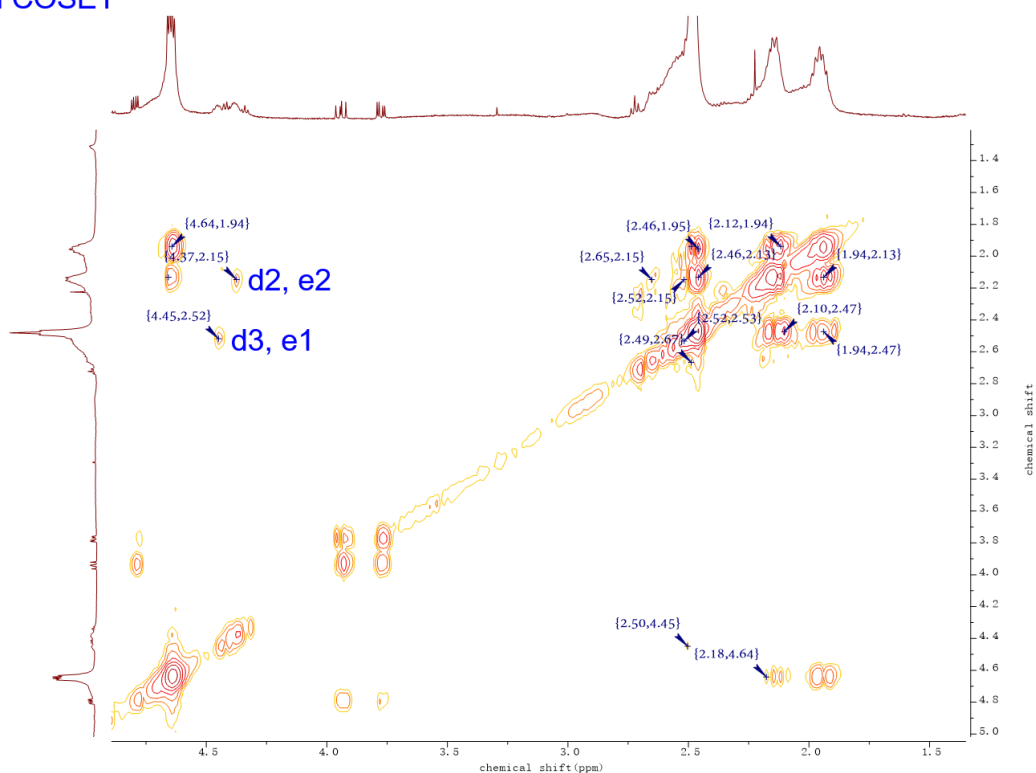

Supplementary Figure 39. H-H COSEY spectra of PBLG-branch-Pcys

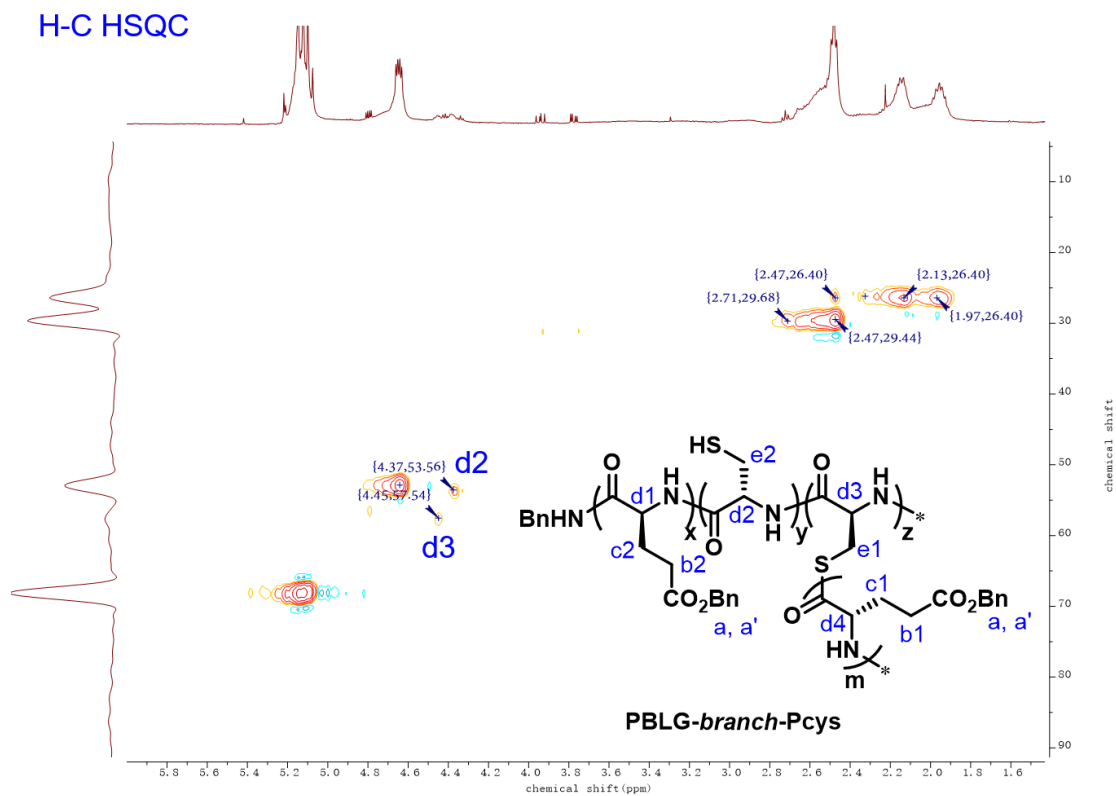

Supplementary Figure 40. H-C HSQC spectra of PBLG-branch-Pcys

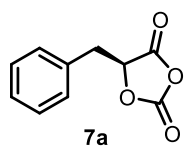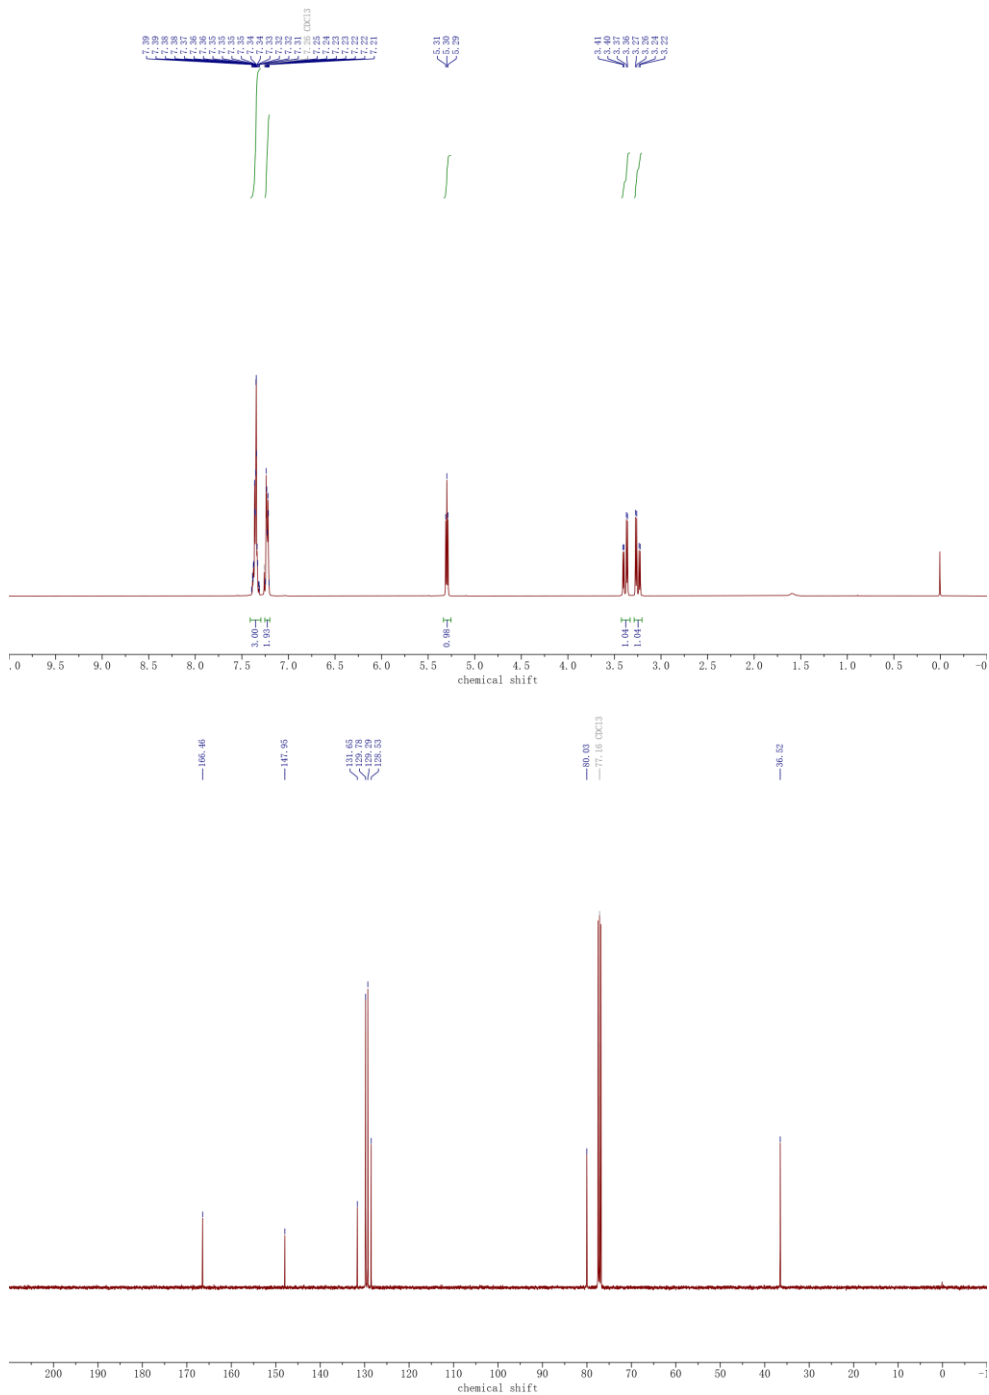

Supplementary Figure 40  $^1\text{H}$  and  $^{13}\text{C}$  NMR spectra of 7a in CDCl<sub>3</sub>.



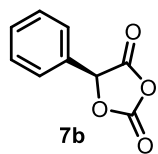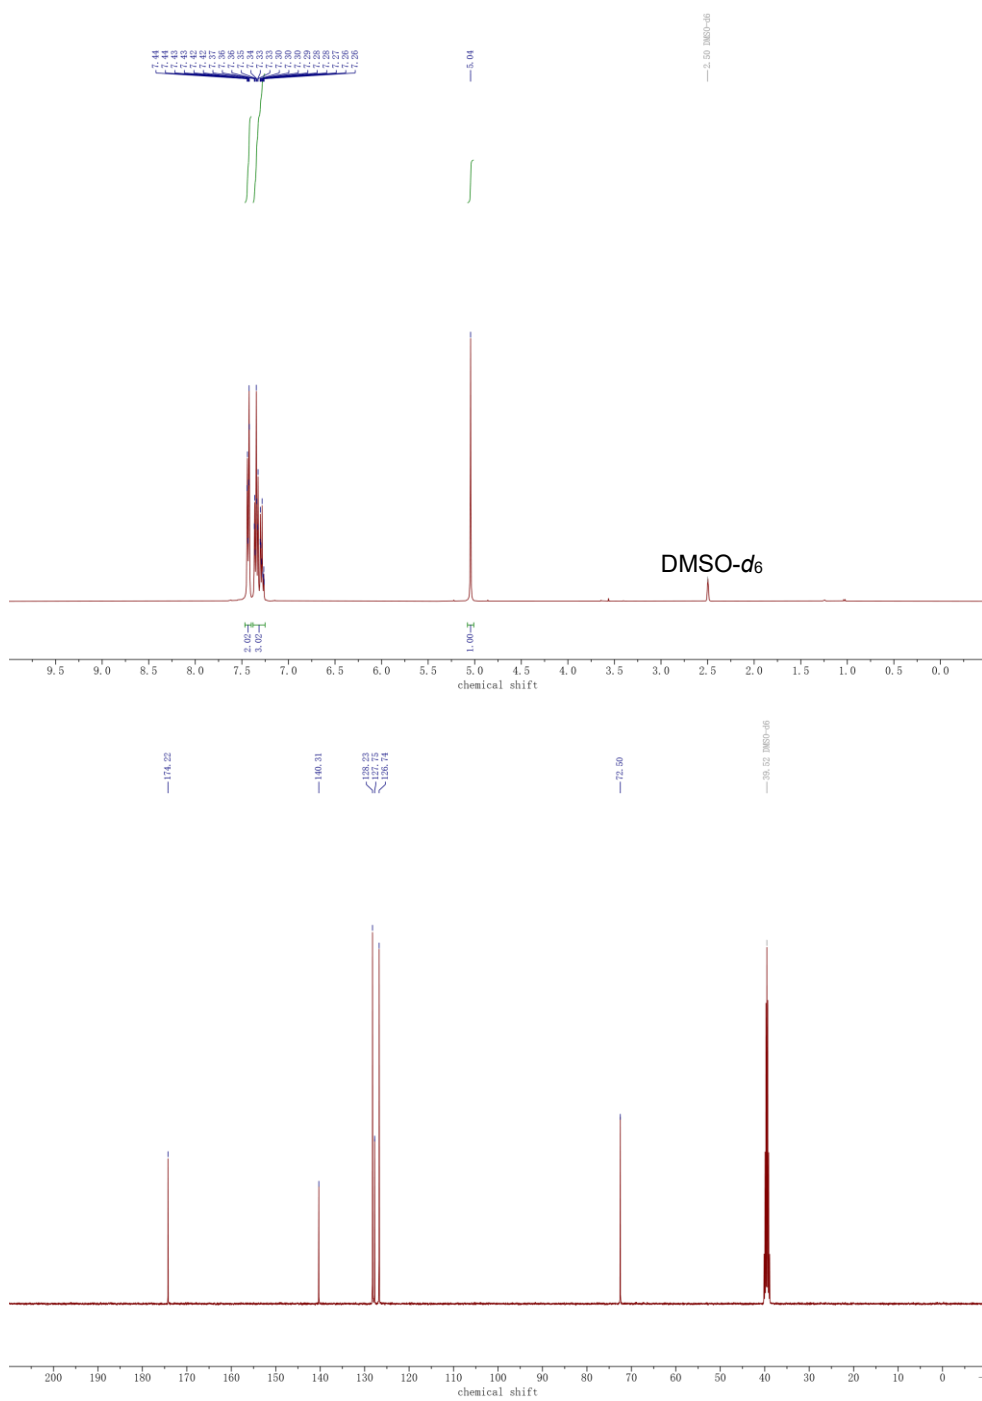

Supplementary Figure 42.  $^1\text{H}$  and  $^{13}\text{C}$  NMR spectra of **7b** in DMSO- $d_6$ .



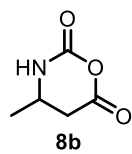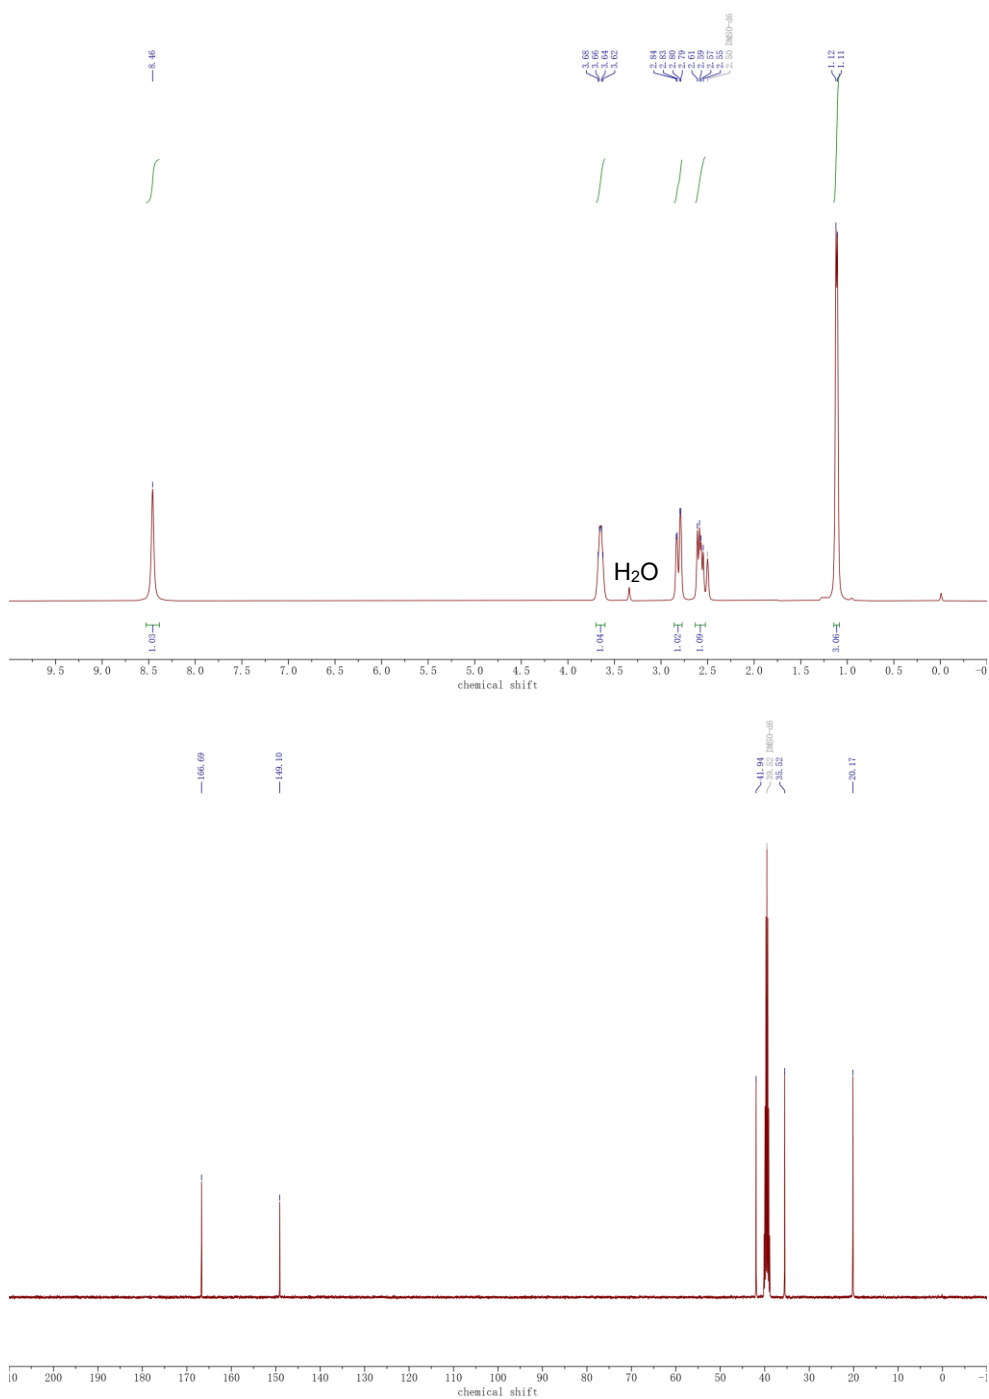

Supplementary Figure 44. <sup>1</sup>H and <sup>13</sup>C NMR spectra of 8b in DMSO-*d*<sub>6</sub>.

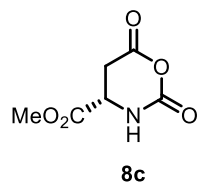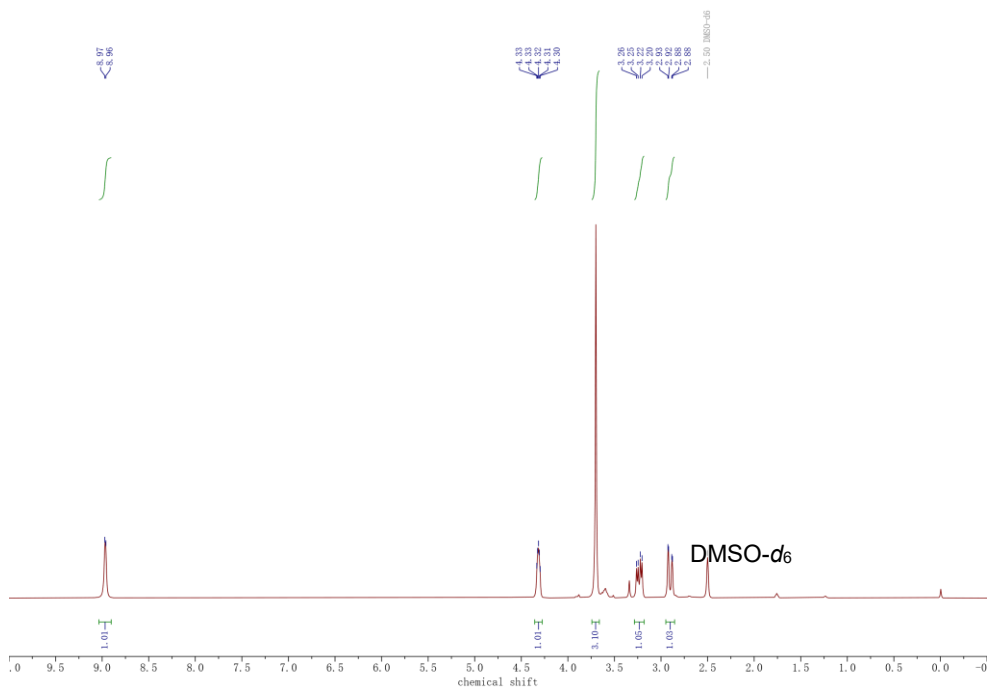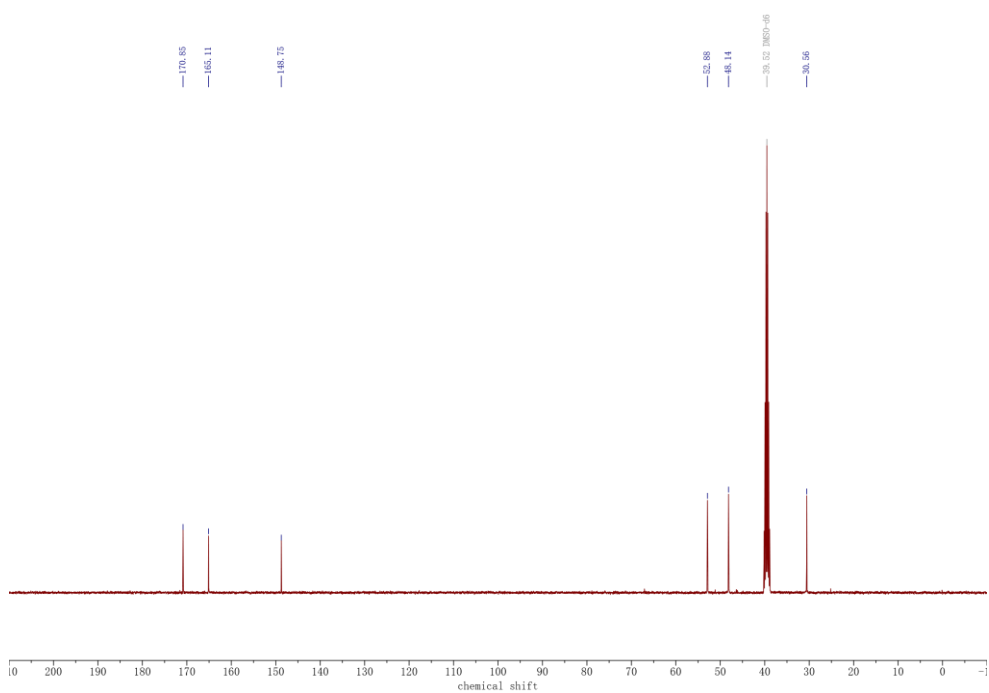

**Supplementary Figure 45. <sup>1</sup>H and <sup>13</sup>C NMR spectra of 8c in DMSO-*d*<sub>6</sub>.**

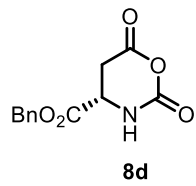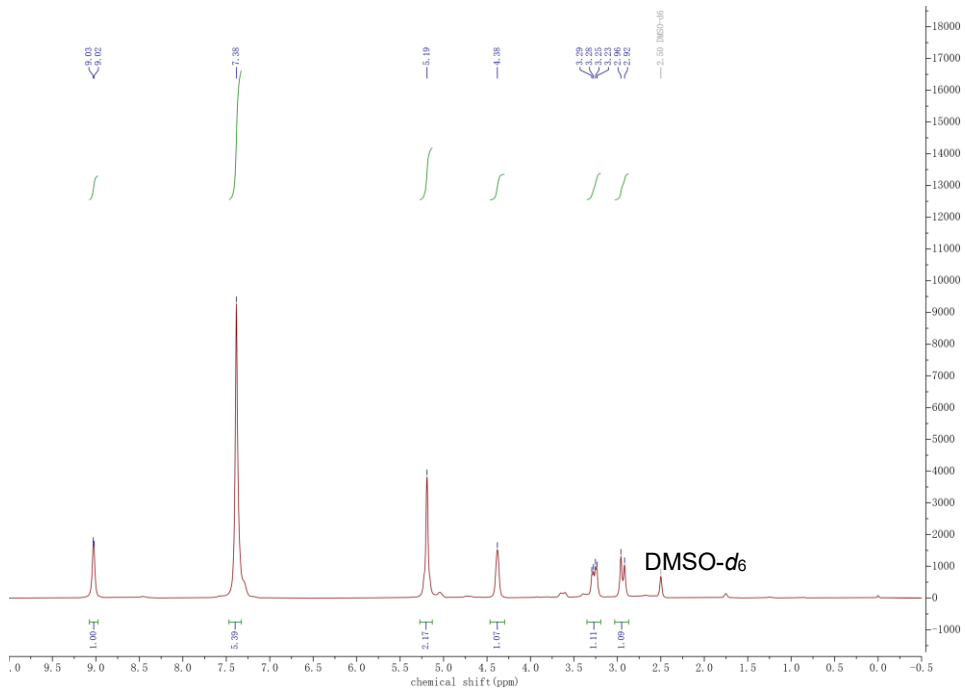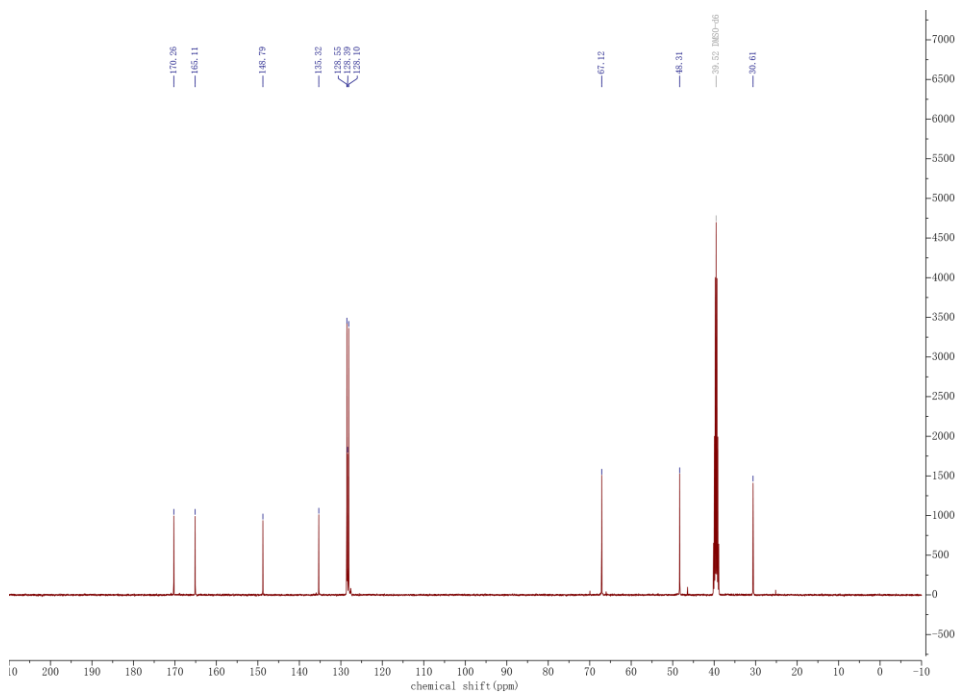

Supplementary Figure 46. <sup>1</sup>H and <sup>13</sup>C NMR spectra of **8d** in DMSO-*d*<sub>6</sub>.

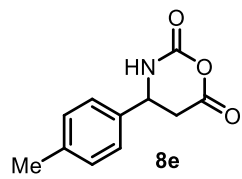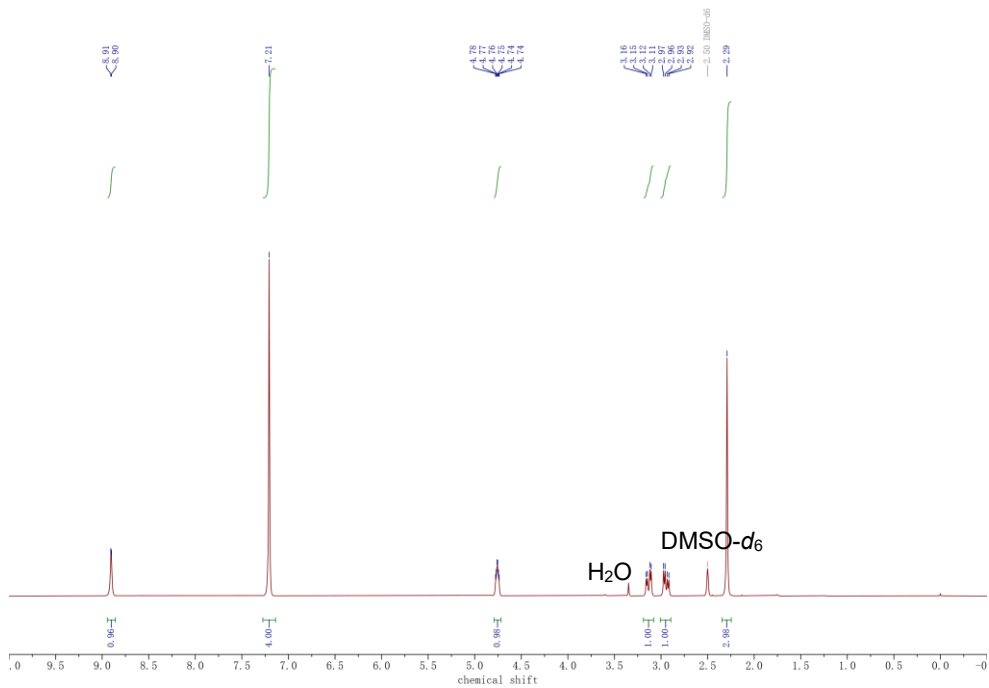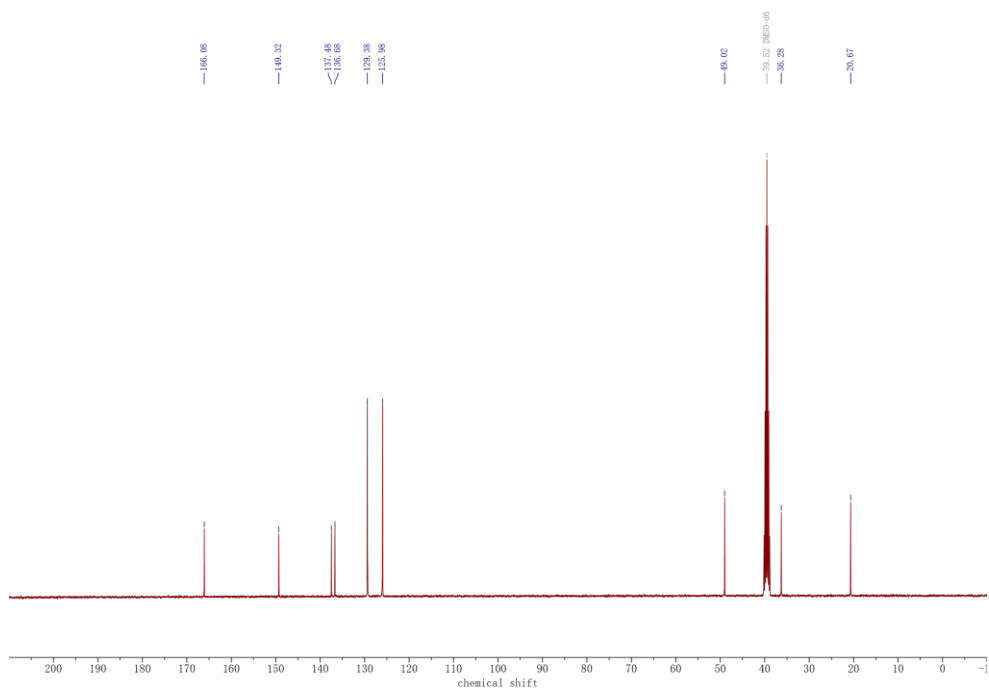

Supplementary Figure 47. <sup>1</sup>H and <sup>13</sup>C NMR spectra of **8e** in DMSO-*d*<sub>6</sub>.

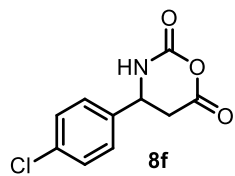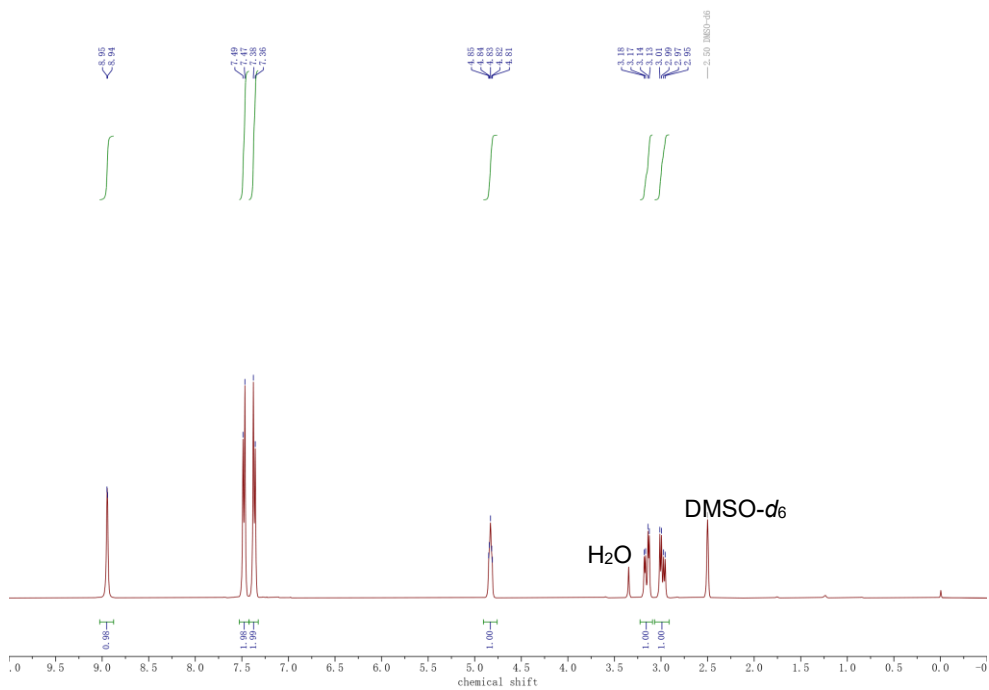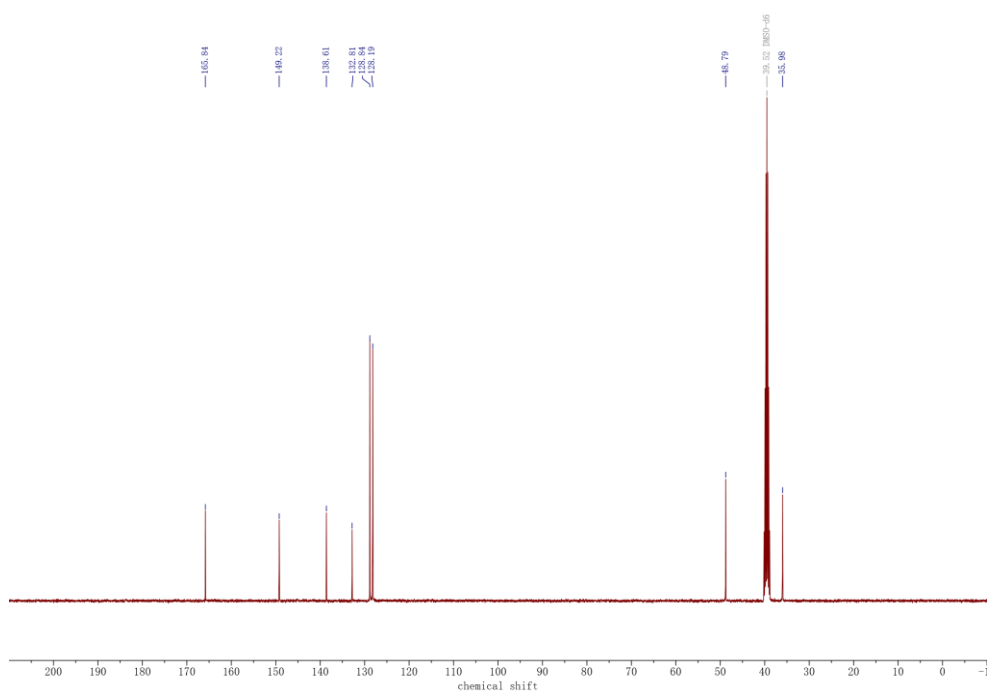

Supplementary Figure 48. <sup>1</sup>H and <sup>13</sup>C NMR spectra of **8f** in DMSO-*d*<sub>6</sub>.

X-Ray Crystal (Supplementary Figure 44-46)

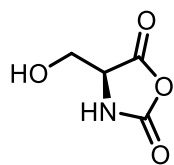

**3p**  
CCDC 2052323

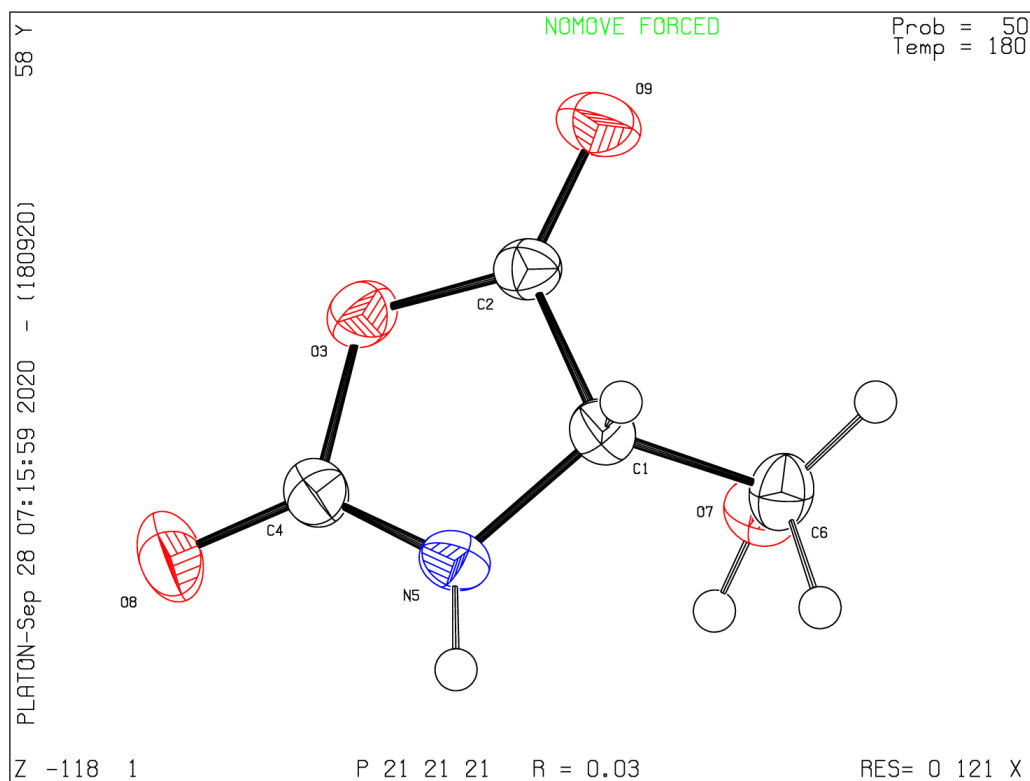

**Supplementary Figure 49. Crystal structure of 3p.**

<https://www.ccdc.cam.ac.uk/structures/Search?ccdc=2052323>



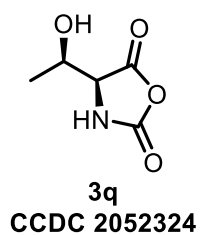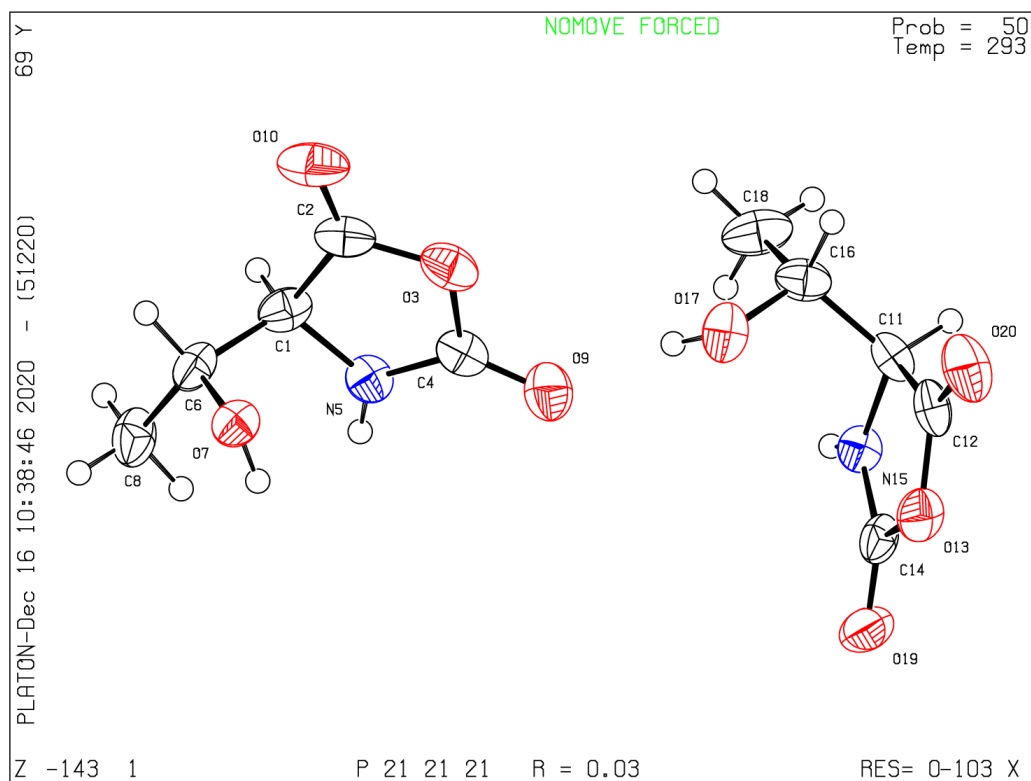

Supplementary Figure 50. Crystal structure of 3q.

<https://www.ccdc.cam.ac.uk/structures/Search?ccdc=2052324>

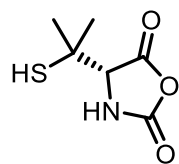

**3s**  
CCDC 2052321

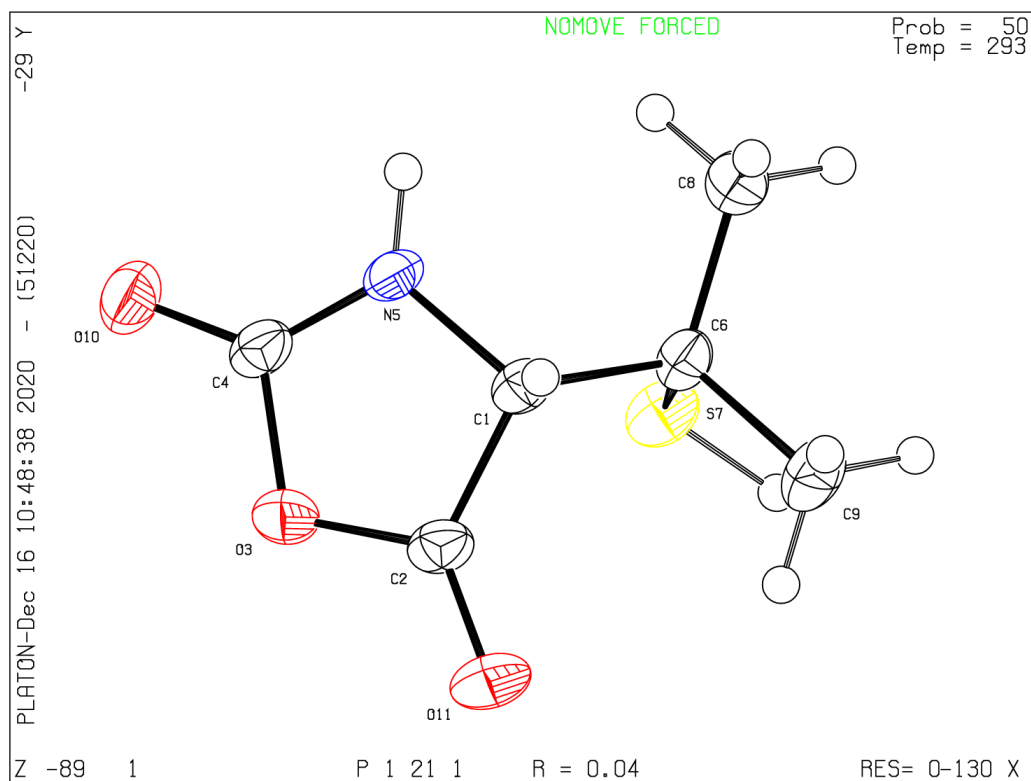

**Supplementary Figure 51. Crystal structure of 3s.**

<https://www.ccdc.cam.ac.uk/structures/Search?ccdc=2052321>

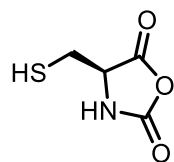

**3r**  
**CCDC 2088683**

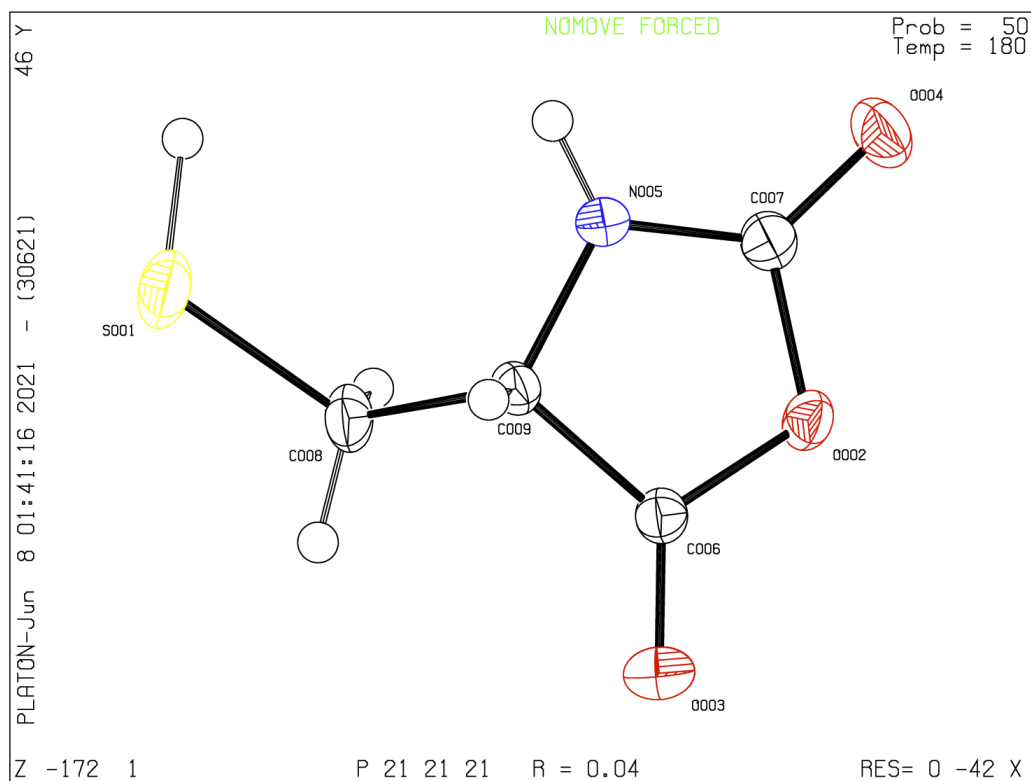

**Supplementary Figure 52. Crystal structure of 3r**

<https://www.ccdc.cam.ac.uk/structures/Search?ccdc=2088683>

### Data and Coordinates of All Stationary Points

| Stationary points | TCG <sup>a</sup> | SPE <sup>b</sup> | G            |
|-------------------|------------------|------------------|--------------|
| L-Alanine         | 0.078579         | -323.7647612     | -323.6861822 |
| NCA Product       | 0.064433         | -435.9204356     | -435.8560026 |
| Phosgene          | -0.017597        | -1033.731283     | -1033.74888  |
| Epoxide           | 0.033553         | -153.7901143     | -153.7565613 |
| HCl               | -0.011244        | -460.8037458     | -460.8149898 |
| Int0a             | 0.076477         | -1357.494906     | -1357.418429 |
| Int0b             | 0.078125         | -1357.491365     | -1357.41324  |
| Int1a             | 0.083436         | -1357.506999     | -1357.423563 |
| Int1b             | 0.083465         | -1357.492371     | -1357.408906 |
| Int2b             | 0.080305         | -1357.52089      | -1357.440585 |
| Int3a             | 0.075301         | -1357.534521     | -1357.45922  |
| Int4a             | 0.073074         | -896.7207426     | -896.6476686 |
| Int4c             | 0.127111         | -1050.522804     | -1050.395693 |
| Int5a             | 0.07583          | -896.7195369     | -896.6437069 |
| Int5c             | 0.124367         | -1050.52902      | -1050.404653 |
| TS1a              | 0.079213         | -1357.490516     | -1357.411303 |
| TS1b              | 0.081937         | -1357.484455     | -1357.402518 |
| TS2a              | 0.08423          | -1357.504967     | -1357.420737 |
| TS2b              | 0.084401         | -1357.491973     | -1357.407572 |
| TS3a              | 0.072616         | -896.6739646     | -896.6013486 |
| TS3c              | 0.123849         | -1050.486486     | -1050.362637 |
| TS4a              | 0.072879         | -896.6824523     | -896.6095733 |
| TS4c              | 0.124239         | -1050.510353     | -1050.386114 |

<sup>a</sup>TCG = Thermal Corrections to Gibbs Energies, computed at the B3LYP/6-31G(d) level

<sup>b</sup>SPE = Single Point Energy, computed at the M06-2X/def2-TZVPP//B3LYP/6-31G(d) level

All data were in Hartree unit.

**Int2b**

Standard orientation:

| Center<br>Number | Atomic<br>Number | Atomic<br>Type | Coordinates (Angstroms) |           |           |
|------------------|------------------|----------------|-------------------------|-----------|-----------|
|                  |                  |                | X                       | Y         | Z         |
| 1                | 6                | 0              | -1.121547               | 1.061949  | -0.527774 |
| 2                | 7                | 0              | -2.444272               | 0.995216  | 0.164423  |
| 3                | 8                | 0              | 1.040568                | 0.139843  | -0.271001 |
| 4                | 6                | 0              | -0.095428               | 0.501098  | 0.445801  |
| 5                | 6                | 0              | -0.758653               | 2.488458  | -0.959791 |
| 6                | 8                | 0              | -0.240231               | 0.396538  | 1.628588  |
| 7                | 6                | 0              | 2.217010                | -0.141521 | 0.366881  |
| 8                | 8                | 0              | 2.523715                | 0.115073  | 1.483263  |
| 9                | 17               | 0              | 3.273038                | -0.940697 | -0.799365 |
| 10               | 1                | 0              | -1.188399               | 0.400547  | -1.394749 |
| 11               | 1                | 0              | -2.361875               | 1.274329  | 1.148250  |
| 12               | 1                | 0              | -3.135130               | 1.599108  | -0.289558 |
| 13               | 1                | 0              | 0.206681                | 2.481999  | -1.471556 |
| 14               | 1                | 0              | -1.509620               | 2.866249  | -1.659346 |
| 15               | 1                | 0              | -0.697243               | 3.163062  | -0.100197 |
| 16               | 1                | 0              | -2.815873               | -0.035932 | 0.124460  |
| 17               | 17               | 0              | -3.239470               | -1.846797 | -0.152738 |

#####

**L-Alanine**

Standard orientation:

| Center<br>Number | Atomic<br>Number | Atomic<br>Type | Coordinates (Angstroms) |           |           |
|------------------|------------------|----------------|-------------------------|-----------|-----------|
|                  |                  |                | X                       | Y         | Z         |
| 1                | 6                | 0              | -0.646472               | -0.025266 | 0.380173  |
| 2                | 7                | 0              | -1.085573               | 1.331244  | -0.001427 |
| 3                | 8                | 0              | 1.448129                | 1.022982  | -0.196943 |
| 4                | 6                | 0              | 0.858544                | -0.151174 | 0.057171  |
| 5                | 6                | 0              | -1.452141               | -1.172863 | -0.233068 |
| 6                | 8                | 0              | 1.465311                | -1.203118 | 0.061931  |
| 7                | 1                | 0              | -0.708643               | -0.090333 | 1.473946  |
| 8                | 1                | 0              | -1.505577               | 1.324109  | -0.930102 |
| 9                | 1                | 0              | -1.789339               | 1.686667  | 0.640210  |
| 10               | 1                | 0              | -1.027726               | -2.136116 | 0.061187  |
| 11               | 1                | 0              | -2.493002               | -1.128642 | 0.102253  |

|    |   |   |           |           |           |
|----|---|---|-----------|-----------|-----------|
| 12 | 1 | 0 | -1.437725 | -1.115727 | -1.328009 |
| 13 | 1 | 0 | 0.693909  | 1.678246  | -0.155057 |

#####

**Epoxide**

Standard orientation:

| Center<br>Number | Atomic<br>Number | Atomic<br>Type | Coordinates (Angstroms) |           |           |
|------------------|------------------|----------------|-------------------------|-----------|-----------|
|                  |                  |                | X                       | Y         | Z         |
| 1                | 6                | 0              | -0.667408               | -0.483400 | 0.000000  |
| 2                | 6                | 0              | 0.000000                | 0.823985  | 0.000000  |
| 3                | 8                | 0              | 0.765408                | -0.390631 | 0.000000  |
| 4                | 1                | 0              | -1.108828               | -0.863991 | 0.920666  |
| 5                | 1                | 0              | -1.108828               | -0.863991 | -0.920666 |
| 6                | 1                | 0              | 0.049422                | 1.404759  | 0.920642  |
| 7                | 1                | 0              | 0.049422                | 1.404759  | -0.920642 |

#####

**HCl**

Standard orientation:

| Center<br>Number | Atomic<br>Number | Atomic<br>Type | Coordinates (Angstroms) |          |           |
|------------------|------------------|----------------|-------------------------|----------|-----------|
|                  |                  |                | X                       | Y        | Z         |
| 1                | 17               | 0              | 0.000000                | 0.000000 | 0.071711  |
| 2                | 1                | 0              | 0.000000                | 0.000000 | -1.219092 |

#####

**NCA Product**

Standard orientation:

| Center<br>Number | Atomic<br>Number | Atomic<br>Type | Coordinates (Angstroms) |           |           |
|------------------|------------------|----------------|-------------------------|-----------|-----------|
|                  |                  |                | X                       | Y         | Z         |
| 1                | 6                | 0              | 0.827411                | -0.610572 | 0.452890  |
| 2                | 7                | 0              | -0.540665               | -1.074483 | 0.300041  |
| 3                | 8                | 0              | -0.674594               | 1.100313  | -0.160394 |
| 4                | 6                | 0              | 0.653273                | 0.864572  | 0.102290  |
| 5                | 6                | 0              | 1.848731                | -1.310355 | -0.448567 |
| 6                | 8                | 0              | 1.491174                | 1.721621  | 0.038302  |

|    |   |   |           |           |           |
|----|---|---|-----------|-----------|-----------|
| 7  | 6 | 0 | -1.413906 | -0.095645 | -0.026744 |
| 8  | 8 | 0 | -2.605869 | -0.125881 | -0.200935 |
| 9  | 1 | 0 | 1.150568  | -0.674999 | 1.500389  |
| 10 | 1 | 0 | -0.857810 | -2.012775 | 0.499307  |
| 11 | 1 | 0 | 2.825328  | -0.832486 | -0.330536 |
| 12 | 1 | 0 | 1.940666  | -2.363095 | -0.165928 |
| 13 | 1 | 0 | 1.547165  | -1.251685 | -1.498516 |

#####

### Phosgene

Standard orientation:

| Center Number | Atomic Number | Atomic Type | Coordinates (Angstroms) |           |           |
|---------------|---------------|-------------|-------------------------|-----------|-----------|
|               |               |             | X                       | Y         | Z         |
| 1             | 6             | 0           | -0.000083               | 0.498656  | -0.000005 |
| 2             | 8             | 0           | -0.000097               | 1.681573  | 0.000003  |
| 3             | 17            | 0           | 1.463913                | -0.483619 | 0.000000  |
| 4             | 17            | 0           | -1.463838               | -0.483706 | 0.000000  |

#####

### Int0a

Standard orientation:

| Center Number | Atomic Number | Atomic Type | Coordinates (Angstroms) |           |           |
|---------------|---------------|-------------|-------------------------|-----------|-----------|
|               |               |             | X                       | Y         | Z         |
| 1             | 6             | 0           | -1.657072               | 0.788763  | -0.086009 |
| 2             | 7             | 0           | -0.584306               | 0.817521  | -1.078005 |
| 3             | 8             | 0           | -2.649266               | -0.965754 | 1.310016  |
| 4             | 6             | 0           | -2.063404               | -0.669785 | 0.128613  |
| 5             | 6             | 0           | -2.914128               | 1.605071  | -0.463013 |
| 6             | 8             | 0           | -1.945581               | -1.528890 | -0.716726 |
| 7             | 1             | 0           | -1.256214               | 1.178569  | 0.859452  |
| 8             | 1             | 0           | -0.841507               | 0.204800  | -1.851193 |
| 9             | 1             | 0           | -0.489041               | 1.758835  | -1.454897 |
| 10            | 1             | 0           | -3.675413               | 1.569225  | 0.324720  |
| 11            | 1             | 0           | -2.638570               | 2.653604  | -0.617406 |
| 12            | 1             | 0           | -3.354915               | 1.221014  | -1.389308 |
| 13            | 1             | 0           | -2.626984               | -0.198791 | 1.908369  |
| 14            | 6             | 0           | 1.643332                | -0.160989 | 0.511821  |
| 15            | 8             | 0           | 0.918704                | -0.353354 | 1.428375  |

|    |    |   |          |           |           |
|----|----|---|----------|-----------|-----------|
| 16 | 17 | 0 | 2.058262 | -1.380989 | -0.689436 |
| 17 | 17 | 0 | 2.549359 | 1.339561  | 0.280289  |

#####

**TS1a**

Standard orientation:

| Center<br>Number | Atomic<br>Number | Atomic<br>Type | Coordinates (Angstroms) |           |           |
|------------------|------------------|----------------|-------------------------|-----------|-----------|
|                  |                  |                | X                       | Y         | Z         |
| 1                | 6                | 0              | -1.437161               | 0.758371  | -0.124250 |
| 2                | 7                | 0              | -0.244320               | 0.528041  | -0.936573 |
| 3                | 8                | 0              | -2.909981               | -0.680638 | 1.202002  |
| 4                | 6                | 0              | -2.085847               | -0.602399 | 0.139519  |
| 5                | 6                | 0              | -2.463773               | 1.705156  | -0.778768 |
| 6                | 8                | 0              | -1.933903               | -1.557930 | -0.588439 |
| 7                | 1                | 0              | -1.111081               | 1.182163  | 0.834222  |
| 8                | 1                | 0              | -0.425310               | -0.217481 | -1.609576 |
| 9                | 1                | 0              | 0.040273                | 1.368130  | -1.436342 |
| 10               | 1                | 0              | -3.335278               | 1.850963  | -0.132047 |
| 11               | 1                | 0              | -2.006252               | 2.683776  | -0.954810 |
| 12               | 1                | 0              | -2.806634               | 1.299257  | -1.735803 |
| 13               | 1                | 0              | -2.885467               | 0.138577  | 1.727511  |
| 14               | 6                | 0              | 1.368589                | -0.146894 | 0.471406  |
| 15               | 8                | 0              | 0.757112                | -0.389918 | 1.462380  |
| 16               | 17               | 0              | 2.021614                | -1.435766 | -0.608464 |
| 17               | 17               | 0              | 2.369170                | 1.361696  | 0.314809  |

#####

**Int1b**

Standard orientation:

| Center<br>Number | Atomic<br>Number | Atomic<br>Type | Coordinates (Angstroms) |           |           |
|------------------|------------------|----------------|-------------------------|-----------|-----------|
|                  |                  |                | X                       | Y         | Z         |
| 1                | 6                | 0              | -2.343408               | 0.596381  | -0.206658 |
| 2                | 7                | 0              | -3.509458               | -0.369261 | -0.168089 |
| 3                | 8                | 0              | -1.206082               | -1.483346 | -0.611463 |
| 4                | 6                | 0              | -1.096796               | -0.297971 | -0.366166 |
| 5                | 6                | 0              | -2.334976               | 1.515925  | 1.009468  |
| 6                | 8                | 0              | 0.002299                | 0.422249  | -0.216128 |
| 7                | 6                | 0              | 1.326996                | -0.219817 | -0.466453 |



|    |    |   |           |           |           |
|----|----|---|-----------|-----------|-----------|
| 8  | 8  | 0 | 1.496612  | -0.893177 | -1.442193 |
| 9  | 17 | 0 | 2.449220  | 1.380361  | -0.290455 |
| 10 | 1  | 0 | -2.452633 | 1.175648  | -1.127639 |
| 11 | 1  | 0 | -3.797018 | -0.578098 | 0.794197  |
| 12 | 1  | 0 | -4.330352 | -0.024558 | -0.673766 |
| 13 | 1  | 0 | -1.490682 | 2.202352  | 0.926985  |
| 14 | 1  | 0 | -3.255695 | 2.104473  | 1.054448  |
| 15 | 1  | 0 | -2.223755 | 0.947218  | 1.938517  |
| 16 | 1  | 0 | -3.180458 | -1.257193 | -0.590467 |
| 17 | 17 | 0 | 1.647443  | -1.140239 | 1.301718  |

#####

**Int0b**

Standard orientation:

| Center Number | Atomic Number | Atomic Type | Coordinates (Angstroms) |           |           |
|---------------|---------------|-------------|-------------------------|-----------|-----------|
|               |               |             | X                       | Y         | Z         |
| 1             | 6             | 0           | -2.834425               | 0.513323  | -0.235129 |
| 2             | 7             | 0           | -3.809747               | -0.631122 | -0.420972 |
| 3             | 8             | 0           | -1.464969               | -1.439661 | -0.353732 |
| 4             | 6             | 0           | -1.424814               | -0.183878 | -0.181341 |
| 5             | 6             | 0           | -3.147756               | 1.344672  | 1.000945  |
| 6             | 8             | 0           | -0.453197               | 0.565540  | 0.013668  |
| 7             | 6             | 0           | 2.164448                | -0.273272 | -0.404324 |
| 8             | 8             | 0           | 1.962799                | -0.862696 | -1.408615 |
| 9             | 17            | 0           | 2.637136                | 1.430179  | -0.344443 |
| 10            | 1             | 0           | -2.885150               | 1.129048  | -1.136004 |
| 11            | 1             | 0           | -4.432948               | -0.766994 | 0.378221  |
| 12            | 1             | 0           | -4.378985               | -0.561654 | -1.266148 |
| 13            | 1             | 0           | -2.359751               | 2.092017  | 1.115815  |
| 14            | 1             | 0           | -4.110663               | 1.859093  | 0.915416  |
| 15            | 1             | 0           | -3.155839               | 0.723328  | 1.904369  |
| 16            | 1             | 0           | -3.101681               | -1.440179 | -0.489256 |
| 17            | 17            | 0           | 2.197655                | -1.025905 | 1.193438  |

#####

**TS1b**

Standard orientation:

| Center Number | Atomic Number | Atomic Type | Coordinates (Angstroms) |   |   |
|---------------|---------------|-------------|-------------------------|---|---|
|               |               |             | X                       | Y | Z |

|    |    |   |           |           |           |
|----|----|---|-----------|-----------|-----------|
| 1  | 6  | 0 | -2.519133 | 0.547987  | -0.232678 |
| 2  | 7  | 0 | -3.567603 | -0.544036 | -0.297267 |
| 3  | 8  | 0 | -1.213308 | -1.446600 | -0.467073 |
| 4  | 6  | 0 | -1.157333 | -0.217991 | -0.272819 |
| 5  | 6  | 0 | -2.700190 | 1.446538  | 0.983092  |
| 6  | 8  | 0 | -0.148929 | 0.535257  | -0.112941 |
| 7  | 6  | 0 | 1.659307  | -0.257443 | -0.400979 |
| 8  | 8  | 0 | 1.660607  | -0.885653 | -1.407784 |
| 9  | 17 | 0 | 2.480378  | 1.387173  | -0.311936 |
| 10 | 1  | 0 | -2.609166 | 1.124425  | -1.156376 |
| 11 | 1  | 0 | -4.057388 | -0.674807 | 0.592194  |
| 12 | 1  | 0 | -4.267705 | -0.403100 | -1.028710 |
| 13 | 1  | 0 | -1.892675 | 2.180977  | 0.991500  |
| 14 | 1  | 0 | -3.656126 | 1.978194  | 0.949348  |
| 15 | 1  | 0 | -2.643178 | 0.871403  | 1.913821  |
| 16 | 1  | 0 | -2.984771 | -1.400838 | -0.494373 |
| 17 | 17 | 0 | 1.813820  | -1.069913 | 1.238768  |

#####

**Int1a**

Standard orientation:

| Center Number | Atomic Number | Atomic Type | Coordinates (Angstroms) |           |           |
|---------------|---------------|-------------|-------------------------|-----------|-----------|
|               |               |             | X                       | Y         | Z         |
| 1             | 6             | 0           | -1.251738               | 0.641717  | -0.224376 |
| 2             | 7             | 0           | 0.003604                | 0.010413  | -0.753339 |
| 3             | 8             | 0           | -3.129219               | -0.115355 | 0.998253  |
| 4             | 6             | 0           | -2.167262               | -0.514689 | 0.167178  |
| 5             | 6             | 0           | -1.903067               | 1.544104  | -1.278614 |
| 6             | 8             | 0           | -2.042877               | -1.637621 | -0.276936 |
| 7             | 1             | 0           | -0.979825               | 1.218530  | 0.660159  |
| 8             | 1             | 0           | -0.256882               | -0.911319 | -1.140643 |
| 9             | 1             | 0           | 0.435597                | 0.571280  | -1.492198 |
| 10            | 1             | 0           | -2.817461               | 1.975569  | -0.864162 |
| 11            | 1             | 0           | -1.227556               | 2.363642  | -1.542249 |
| 12            | 1             | 0           | -2.160700               | 0.983238  | -2.182226 |
| 13            | 1             | 0           | -3.713268               | -0.877349 | 1.183190  |
| 14            | 6             | 0           | 1.064632                | -0.264804 | 0.385981  |
| 15            | 8             | 0           | 0.635906                | -0.750200 | 1.399233  |
| 16            | 17            | 0           | 2.418065                | -1.216651 | -0.590874 |
| 17            | 17            | 0           | 1.848346                | 1.580825  | 0.554761  |

#####

**TS2a**

Standard orientation:

| Center<br>Number | Atomic<br>Number | Atomic<br>Type | Coordinates (Angstroms) |           |           |
|------------------|------------------|----------------|-------------------------|-----------|-----------|
|                  |                  |                | X                       | Y         | Z         |
| 1                | 6                | 0              | 1.188670                | 0.644945  | 0.139757  |
| 2                | 7                | 0              | -0.025971               | -0.018251 | 0.735840  |
| 3                | 8                | 0              | 3.163098                | -0.088835 | -0.931302 |
| 4                | 6                | 0              | 2.189588                | -0.477591 | -0.111234 |
| 5                | 6                | 0              | 1.741733                | 1.705722  | 1.095793  |
| 6                | 8                | 0              | 2.105998                | -1.566864 | 0.419827  |
| 7                | 1                | 0              | 0.870679                | 1.098688  | -0.798530 |
| 8                | 1                | 0              | 0.304042                | -0.806321 | 1.319968  |
| 9                | 1                | 0              | -0.568058               | 0.651645  | 1.294918  |
| 10               | 1                | 0              | 2.623864                | 2.162635  | 0.640972  |
| 11               | 1                | 0              | 0.993666                | 2.487438  | 1.254689  |
| 12               | 1                | 0              | 2.030432                | 1.271609  | 2.058055  |
| 13               | 1                | 0              | 3.799920                | -0.824560 | -1.028208 |
| 14               | 6                | 0              | -0.973724               | -0.585277 | -0.322712 |
| 15               | 8                | 0              | -0.562568               | -0.893762 | -1.395290 |
| 16               | 17               | 0              | -2.345700               | -1.365693 | 0.495145  |
| 17               | 17               | 0              | -1.913275               | 1.763076  | -0.462689 |

#####

**Int5a**

Standard orientation:

| Center<br>Number | Atomic<br>Number | Atomic<br>Type | Coordinates (Angstroms) |           |           |
|------------------|------------------|----------------|-------------------------|-----------|-----------|
|                  |                  |                | X                       | Y         | Z         |
| 1                | 6                | 0              | -0.115400               | -1.154264 | -0.455158 |
| 2                | 7                | 0              | 1.180719                | -1.077938 | 0.208931  |
| 3                | 8                | 0              | -1.147529               | 0.669628  | -1.612007 |
| 4                | 6                | 0              | -0.465701               | 0.351063  | -0.482965 |
| 5                | 6                | 0              | -1.100231               | -2.111012 | 0.198672  |
| 6                | 8                | 0              | 0.763482                | 1.026900  | -0.378886 |
| 7                | 1                | 0              | 0.009882                | -1.430075 | -1.512132 |
| 8                | 1                | 0              | 1.778397                | -1.884680 | 0.328163  |
| 9                | 1                | 0              | -2.078196               | -2.027893 | -0.284712 |

|    |    |   |           |           |           |
|----|----|---|-----------|-----------|-----------|
| 10 | 1  | 0 | -0.747211 | -3.139398 | 0.071562  |
| 11 | 1  | 0 | -1.208456 | -1.904139 | 1.265268  |
| 12 | 1  | 0 | -1.318688 | 1.628572  | -1.629940 |
| 13 | 6  | 0 | 1.744161  | 0.155260  | 0.097133  |
| 14 | 8  | 0 | 2.863115  | 0.528943  | 0.349890  |
| 15 | 17 | 0 | -1.465310 | 0.885478  | 1.016541  |

#####

**Int4a**

Standard orientation:

| Center<br>Number | Atomic<br>Number | Atomic<br>Type | Coordinates (Angstroms) |           |           |
|------------------|------------------|----------------|-------------------------|-----------|-----------|
|                  |                  |                | X                       | Y         | Z         |
| 1                | 6                | 0              | -0.846382               | 0.851191  | 0.498885  |
| 2                | 7                | 0              | 0.541415                | 0.738830  | 0.949299  |
| 3                | 8                | 0              | -2.664694               | -0.462022 | -0.297279 |
| 4                | 6                | 0              | -1.495113               | -0.535496 | 0.365343  |
| 5                | 6                | 0              | -1.054115               | 1.788791  | -0.700560 |
| 6                | 8                | 0              | -1.058318               | -1.557190 | 0.844497  |
| 7                | 1                | 0              | -1.365783               | 1.306639  | 1.350687  |
| 8                | 1                | 0              | 0.734091                | 1.039466  | 1.897874  |
| 9                | 1                | 0              | -2.122701               | 1.956215  | -0.852120 |
| 10               | 1                | 0              | -0.576392               | 2.749647  | -0.489737 |
| 11               | 1                | 0              | -0.632453               | 1.380129  | -1.619941 |
| 12               | 1                | 0              | -3.052142               | -1.358945 | -0.298459 |
| 13               | 6                | 0              | 1.603363                | 0.109579  | 0.405192  |
| 14               | 8                | 0              | 2.687642                | -0.026612 | 0.908024  |
| 15               | 17               | 0              | 1.309524                | -0.538986 | -1.275793 |

#####

**TS3a**

Standard orientation:

| Center<br>Number | Atomic<br>Number | Atomic<br>Type | Coordinates (Angstroms) |           |           |
|------------------|------------------|----------------|-------------------------|-----------|-----------|
|                  |                  |                | X                       | Y         | Z         |
| 1                | 6                | 0              | -1.173850               | 0.068624  | 0.911841  |
| 2                | 7                | 0              | 0.141900                | -0.339933 | 1.404484  |
| 3                | 8                | 0              | -2.297228               | -0.433490 | -1.154890 |
| 4                | 6                | 0              | -1.206245               | -0.580981 | -0.449188 |
| 5                | 6                | 0              | -1.441091               | 1.579354  | 0.912093  |

|    |    |   |           |           |           |
|----|----|---|-----------|-----------|-----------|
| 6  | 8  | 0 | -0.218758 | -1.231527 | -0.809519 |
| 7  | 1  | 0 | -1.935079 | -0.433558 | 1.523085  |
| 8  | 1  | 0 | 0.524336  | 0.120602  | 2.225205  |
| 9  | 1  | 0 | -2.438398 | 1.769474  | 0.505923  |
| 10 | 1  | 0 | -1.417872 | 1.948922  | 1.941511  |
| 11 | 1  | 0 | -0.689943 | 2.100505  | 0.316761  |
| 12 | 1  | 0 | -2.205223 | -0.888725 | -2.017042 |
| 13 | 6  | 0 | 1.050065  | -0.805920 | 0.539127  |
| 14 | 8  | 0 | 2.028108  | -1.445563 | 0.504694  |
| 15 | 17 | 0 | 1.629331  | 1.240029  | -0.831315 |

#####

**Int5c**

Standard orientation:

| Center Number | Atomic Number | Atomic Type | Coordinates (Angstroms) |           |           |
|---------------|---------------|-------------|-------------------------|-----------|-----------|
|               |               |             | X                       | Y         | Z         |
| 1             | 6             | 0           | -1.935304               | 0.811061  | 0.207416  |
| 2             | 7             | 0           | -2.424764               | -0.489007 | -0.238139 |
| 3             | 8             | 0           | 0.352428                | 1.198388  | 0.918656  |
| 4             | 6             | 0           | -0.417860               | 0.556191  | 0.044315  |
| 5             | 6             | 0           | -2.334411               | 1.150604  | 1.645741  |
| 6             | 8             | 0           | -0.254122               | -0.840385 | 0.075264  |
| 7             | 1             | 0           | -2.262699               | 1.599286  | -0.472255 |
| 8             | 1             | 0           | -3.403918               | -0.739117 | -0.238939 |
| 9             | 1             | 0           | -1.913086               | 2.116431  | 1.936420  |
| 10            | 1             | 0           | -3.425337               | 1.213488  | 1.713832  |
| 11            | 1             | 0           | -1.982205               | 0.387732  | 2.346187  |
| 12            | 1             | 0           | 1.294475                | 0.856038  | 0.882389  |
| 13            | 6             | 0           | -1.479614               | -1.461425 | -0.176824 |
| 14            | 8             | 0           | -1.575043               | -2.657556 | -0.310273 |
| 15            | 17            | 0           | 0.080090                | 1.071824  | -1.754129 |
| 16            | 6             | 0           | 3.517971                | -0.110091 | -0.318111 |
| 17            | 6             | 0           | 3.089312                | -1.124210 | 0.650722  |
| 18            | 8             | 0           | 2.872982                | 0.284782  | 0.918749  |
| 19            | 1             | 0           | 4.566050                | 0.173313  | -0.376458 |
| 20            | 1             | 0           | 2.924601                | 0.060586  | -1.212990 |
| 21            | 1             | 0           | 3.821822                | -1.588431 | 1.306497  |
| 22            | 1             | 0           | 2.181602                | -1.691891 | 0.463755  |

#####

**Int4c**

Standard orientation:

| Center<br>Number | Atomic<br>Number | Atomic<br>Type | Coordinates (Angstroms) |           |           |
|------------------|------------------|----------------|-------------------------|-----------|-----------|
|                  |                  |                | X                       | Y         | Z         |
| 1                | 6                | 0              | -0.973599               | 1.260211  | -0.296141 |
| 2                | 7                | 0              | -1.977859               | 0.673918  | 0.582295  |
| 3                | 8                | 0              | 1.289272                | 1.050186  | -0.961425 |
| 4                | 6                | 0              | 0.402099                | 0.613374  | -0.071256 |
| 5                | 6                | 0              | -0.917854               | 2.777992  | -0.065515 |
| 6                | 8                | 0              | 0.642232                | -0.187215 | 0.814408  |
| 7                | 1                | 0              | -1.260145               | 1.071813  | -1.333125 |
| 8                | 1                | 0              | -2.081231               | 1.099451  | 1.498101  |
| 9                | 1                | 0              | -0.186262               | 3.226745  | -0.740047 |
| 10               | 1                | 0              | -1.898212               | 3.221494  | -0.260387 |
| 11               | 1                | 0              | -0.624619               | 3.010152  | 0.964582  |
| 12               | 1                | 0              | 2.177292                | 0.619744  | -0.775925 |
| 13               | 6                | 0              | -2.538225               | -0.550639 | 0.525627  |
| 14               | 8                | 0              | -3.224354               | -1.075904 | 1.361160  |
| 15               | 17               | 0              | -2.226514               | -1.413307 | -1.060511 |
| 16               | 6                | 0              | 3.616008                | -1.458189 | 0.013065  |
| 17               | 6                | 0              | 3.956864                | -0.362520 | 0.924490  |
| 18               | 8                | 0              | 3.679765                | -0.093446 | -0.473132 |
| 19               | 1                | 0              | 4.398531                | -2.102343 | -0.380199 |
| 20               | 1                | 0              | 2.613599                | -1.876325 | 0.049986  |
| 21               | 1                | 0              | 4.992541                | -0.192795 | 1.208397  |
| 22               | 1                | 0              | 3.197187                | 0.000510  | 1.611546  |

#####

**TS3c**

Standard orientation:

| Center<br>Number | Atomic<br>Number | Atomic<br>Type | Coordinates (Angstroms) |           |           |
|------------------|------------------|----------------|-------------------------|-----------|-----------|
|                  |                  |                | X                       | Y         | Z         |
| 1                | 6                | 0              | -1.422088               | 1.286568  | -0.332714 |
| 2                | 7                | 0              | -2.154067               | 0.435985  | 0.605212  |
| 3                | 8                | 0              | 0.953634                | 1.563192  | -0.630377 |
| 4                | 6                | 0              | 0.009696                | 0.873829  | -0.078693 |
| 5                | 6                | 0              | -1.695769               | 2.773654  | -0.103569 |
| 6                | 8                | 0              | 0.188320                | -0.126986 | 0.641728  |
| 7                | 1                | 0              | -1.652755               | 1.002593  | -1.368991 |

|    |    |   |           |           |           |
|----|----|---|-----------|-----------|-----------|
| 8  | 1  | 0 | -3.163824 | 0.391230  | 0.491640  |
| 9  | 1  | 0 | -1.098611 | 3.366621  | -0.800678 |
| 10 | 1  | 0 | -2.751821 | 2.989808  | -0.287508 |
| 11 | 1  | 0 | -1.449244 | 3.066219  | 0.920678  |
| 12 | 1  | 0 | 1.873049  | 1.145124  | -0.443132 |
| 13 | 6  | 0 | -1.592953 | -0.760291 | 0.896413  |
| 14 | 8  | 0 | -1.689097 | -1.602979 | 1.706671  |
| 15 | 17 | 0 | -1.491498 | -1.851010 | -1.242683 |
| 16 | 6  | 0 | 3.361118  | -0.950789 | -0.416803 |
| 17 | 6  | 0 | 3.499085  | -0.357890 | 0.915958  |
| 18 | 8  | 0 | 3.286633  | 0.492623  | -0.244896 |
| 19 | 1  | 0 | 4.243092  | -1.276050 | -0.961375 |
| 20 | 1  | 0 | 2.421738  | -1.422940 | -0.692515 |
| 21 | 1  | 0 | 4.483874  | -0.243384 | 1.360260  |
| 22 | 1  | 0 | 2.657981  | -0.401230 | 1.602195  |

#####

#### TS4c

Standard orientation:

| Center<br>Number | Atomic<br>Number | Atomic<br>Type | Coordinates (Angstroms) |           |           |
|------------------|------------------|----------------|-------------------------|-----------|-----------|
|                  |                  |                | X                       | Y         | Z         |
| 1                | 6                | 0              | 1.845073                | -0.836238 | -0.370655 |
| 2                | 7                | 0              | 2.434449                | 0.417532  | 0.081284  |
| 3                | 8                | 0              | -0.445995               | -1.519242 | 0.147909  |
| 4                | 6                | 0              | 0.448265                | -0.644295 | 0.166482  |
| 5                | 6                | 0              | 2.525715                | -2.090835 | 0.194232  |
| 6                | 8                | 0              | 0.351077                | 0.448977  | 0.892751  |
| 7                | 1                | 0              | 1.788766                | -0.873079 | -1.460918 |
| 8                | 1                | 0              | 3.329123                | 0.764742  | -0.237208 |
| 9                | 1                | 0              | 1.984129                | -2.981843 | -0.134641 |
| 10               | 1                | 0              | 3.549198                | -2.146980 | -0.186130 |
| 11               | 1                | 0              | 2.555514                | -2.067692 | 1.287071  |
| 12               | 1                | 0              | -1.462177               | -1.188274 | 0.499978  |
| 13               | 6                | 0              | 1.591447                | 1.213936  | 0.758703  |
| 14               | 8                | 0              | 1.682528                | 2.302687  | 1.242763  |
| 15               | 17               | 0              | -0.397704               | 0.745350  | -2.172173 |
| 16               | 6                | 0              | -3.379643               | -0.030462 | -0.185521 |
| 17               | 6                | 0              | -3.023592               | 0.497104  | 1.132835  |
| 18               | 8                | 0              | -2.712108               | -0.899505 | 0.802799  |
| 19               | 1                | 0              | -4.398886               | -0.346750 | -0.382315 |
| 20               | 1                | 0              | -2.748695               | 0.218605  | -1.037410 |

|    |   |   |           |          |          |
|----|---|---|-----------|----------|----------|
| 21 | 1 | 0 | -3.775193 | 0.575835 | 1.911593 |
| 22 | 1 | 0 | -2.149561 | 1.133168 | 1.231695 |

#####

**TS4a**

Standard orientation:

| Center Number | Atomic Number | Atomic Type | Coordinates (Angstroms) |           |           |
|---------------|---------------|-------------|-------------------------|-----------|-----------|
|               |               |             | X                       | Y         | Z         |
| 1             | 6             | 0           | 0.004605                | -0.747191 | -0.653260 |
| 2             | 7             | 0           | 0.997490                | 0.226220  | -1.104016 |
| 3             | 8             | 0           | -0.335511               | -1.430172 | 1.651491  |
| 4             | 6             | 0           | 0.259449                | -0.675853 | 0.804578  |
| 5             | 6             | 0           | 0.114253                | -2.136135 | -1.286160 |
| 6             | 8             | 0           | 1.108126                | 0.219132  | 1.150754  |
| 7             | 1             | 0           | -1.022789               | -0.311457 | -0.764341 |
| 8             | 1             | 0           | 1.041588                | 0.561209  | -2.059072 |
| 9             | 1             | 0           | -0.631079               | -2.799106 | -0.839569 |
| 10            | 1             | 0           | -0.097779               | -2.056311 | -2.354971 |
| 11            | 1             | 0           | 1.111905                | -2.561303 | -1.149076 |
| 12            | 1             | 0           | -0.098385               | -1.214971 | 2.579682  |
| 13            | 6             | 0           | 1.620171                | 0.896340  | -0.132957 |
| 14            | 8             | 0           | 2.404481                | 1.779793  | -0.038423 |
| 15            | 17            | 0           | -2.629031               | 1.072083  | -0.128725 |

#####

**TS2b**

Standard orientation:

| Center Number | Atomic Number | Atomic Type | Coordinates (Angstroms) |           |           |
|---------------|---------------|-------------|-------------------------|-----------|-----------|
|               |               |             | X                       | Y         | Z         |
| 1             | 6             | 0           | 2.327269                | 0.617069  | 0.181177  |
| 2             | 7             | 0           | 3.488201                | -0.354118 | 0.171274  |
| 3             | 8             | 0           | 1.189183                | -1.421570 | 0.756073  |
| 4             | 6             | 0           | 1.083948                | -0.256303 | 0.437442  |
| 5             | 6             | 0           | 2.287963                | 1.450605  | -1.094656 |
| 6             | 8             | 0           | -0.017750               | 0.467079  | 0.272872  |
| 7             | 6             | 0           | -1.326943               | -0.140570 | 0.533924  |
| 8             | 8             | 0           | -1.518421               | -0.851335 | 1.475479  |
| 9             | 17            | 0           | -2.465552               | 1.337633  | 0.249272  |



|    |    |   |           |           |           |
|----|----|---|-----------|-----------|-----------|
| 10 | 1  | 0 | 2.468182  | 1.257085  | 1.056594  |
| 11 | 1  | 0 | 4.330713  | 0.031412  | 0.607409  |
| 12 | 1  | 0 | 3.184432  | -1.204885 | 0.678211  |
| 13 | 1  | 0 | 1.465196  | 2.164192  | -1.027579 |
| 14 | 1  | 0 | 3.220980  | 2.007784  | -1.216371 |
| 15 | 1  | 0 | 2.124462  | 0.821718  | -1.975278 |
| 16 | 1  | 0 | 3.731998  | -0.641726 | -0.783085 |
| 17 | 17 | 0 | -1.558029 | -1.192631 | -1.362303 |

-----  
#####

## Supplementary References

---

- <sup>1</sup> Sun, Y.; Hou, Y.; Zhou, X.; Yuan, J.; Wang, J.; Lu, H. *ACS Macro Lett.* **2015**, *4*, 1000.
- <sup>2</sup> Gaussian 09, Revision E.01, M. J. Frisch, G. W. Trucks, H. B. Schlegel, G. E. Scuseria, M. A. Robb, J. R. Cheeseman, G. Scalmani, V. Barone, B. Mennucci, G. A. Petersson, H. Nakatsuji, M. Caricato, X. Li, H. P. Hratchian, A. F. Izmaylov, J. Bloino, G. Zheng, J. L. Sonnenberg, M. Hada, M. Ehara, K. Toyota, R. Fukuda, J. Hasegawa, M. Ishida, T. Nakajima, Y. Honda, O. Kitao, H. Nakai, T. Vreven, J. A. Montgomery, Jr., J. E. Peralta, F. Ogliaro, M. Bearpark, J. J. Heyd, E. Brothers, K. N. Kudin, V. N. Staroverov, T. Keith, R. Kobayashi, J. Normand, K. Raghavachari, A. Rendell, J. C. Burant, S. S. Iyengar, J. Tomasi, M. Cossi, N. Rega, J. M. Millam, M. Klene, J. E. Knox, J. B. Cross, V. Bakken, C. Adamo, J. Jaramillo, R. Gomperts, R. E. Stratmann, O. Yazyev, A. J. Austin, R. Cammi, C. Pomelli, J. W. Ochterski, R. L. Martin, K. Morokuma, V. G. Zakrzewski, G. A. Voth, P. Salvador, J. J. Dannenberg, S. Dapprich, A. D. Daniels, O. Farkas, J. B. Foresman, J. V. Ortiz, J. Cioslowski, and D. J. Fox, Gaussian, Inc., Wallingford CT, 2013.
- <sup>3</sup> (a) Becke, A. D. *J. Chem. Phys.* **1993**, *98*, 5648. (b) Lee, C.; Yang, W.; Parr, R. G. *Phys. Rev. B* **1988**, *37*, 785.
- <sup>4</sup> Marenich, A. V.; Cramer, C. J.; Truhlar, D. G. *J. Phys. Chem. B* **2009**, *113*, 6378.
- <sup>5</sup> (a) Rassolov, V. A.; Ratner, M. A.; Pople, J. A.; Redfern, P. C.; Curtiss, L. A. *J. Comp. Chem.* **2001**, *22*, 976. (b) Rassolov, V. A.; Pople, J. A.; Ratner, M. A.; Windus, T. L. *J. Chem. Phys.* **1998**, *109*, 1223.
- <sup>6</sup> Zhao, Y.; Truhlar, D. G. *Theor. Chem. Acc.* **2007**, *120*, 215.
- <sup>7</sup> (a) Weigend, F.; Ahlrichs, R. *Phys. Chem. Chem. Phys.* **2005**, *7*, 3297; (b) Weigend, F. *Phys. Chem. Chem. Phys.* **2006**, *8*, 1057.
